# Supplementary material
Source: publisher figshare collection journal article supplement (https://frontiersin.figshare.com/ndownloader/files/25261484)
Supplement: Supplementary file [file 25261484]

## Supporting Information

### **Eremophilane-type Sesquiterpenoids from the Endophytic Fungus *Rhizopycnis vagum* and Their Antibacterial, Cytotoxic, and Phytotoxic Activities**

*Ali Wang<sup>1</sup>, Ruya Yin<sup>1</sup>, Zhiyao Zhou<sup>1</sup>, Gan Gu<sup>1</sup>, Jungui Dai<sup>2</sup>, Daowan Lai<sup>1\*</sup> and  
Ligang Zhou<sup>1\*</sup>*

*<sup>1</sup> Department of Plant Pathology, College of Plant Protection, China Agricultural University, Beijing 100193, China, <sup>2</sup> State Key Laboratory of Bioactive Substance and Function of Natural Medicines, Institute of Materia Medica, Chinese Academy of Medical Science & Peking Union Medical College, Beijing 100050, China*

#### **\* Corresponding Authors**

Daowan Lai: [dwlai@cau.edu.cn](mailto:dwlai@cau.edu.cn); Ligang Zhou: [lgzhou@cau.edu.cn](mailto:lgzhou@cau.edu.cn)

## Contents

|                                                                                                                                      |     |
|--------------------------------------------------------------------------------------------------------------------------------------|-----|
| <b>Figure S1.</b> Optimized geometries of the predominant conformers of <b>1</b> at the B3LYP/6-31G(d) level in the gas phase.....   | S3  |
| <b>Figure S2.</b> Optimized geometries of the predominant conformers of <b>2</b> at the B3LYP/6-31G(d) level in the gas phase.....   | S3  |
| <b>Figure S3.</b> Optimized geometries of the predominant conformers of <b>4</b> at the B3LYP/6-31G(d) level in the gas phase.....   | S3  |
| <b>Figure S4.</b> The experiment ECD and the calculated spectra of <b>4</b> using three different methods. ...                       | S4  |
| <b>Figure S5.</b> Optimized geometries of the predominant conformers of <b>5</b> at the B3LYP/6-31G(d) level in the gas phase.....   | S4  |
| <b>Figure S6.</b> Comparison of the <sup>1</sup> H NMR spectra of the ( <i>R/S</i> )-MPA esters of <b>5</b> . ....                   | S5  |
| <b>Figure S6-1.</b> Comparison of the <sup>1</sup> H NMR spectra of the ( <i>R/S</i> )-MPA esters of <b>5</b> (Expansion). ....      | S5  |
| <b>Figure S7.</b> Optimized geometries of the predominant conformers of <b>6</b> at the B3LYP/6-31G(d) level in the gas phase.....   | S6  |
| <b>Figure S8.</b> The experiment ECD and the calculated spectra of <b>6</b> using three different methods. ...                       | S6  |
| <b>Figure S9.</b> Optimized geometries of the predominant conformers of <b>7</b> at the B3LYP/6-31G(d) level in the gas phase.....   | S7  |
| <b>Figure S10.</b> Optimized geometries of the predominant conformers of <b>8</b> at the B3LYP/6-31G(d) level in the gas phase.....  | S8  |
| <b>Figure S11.</b> The experiment ECD and the calculated spectra of <b>8</b> using three different methods. ...                      | S9  |
| <b>Figure S12.</b> Optimized geometries of the predominant conformers of <b>9</b> at the B3LYP/6-31G(d) level in the gas phase.....  | S9  |
| <b>Figure S13.</b> Optimized geometries of the predominant conformers of <b>10</b> at the B3LYP/6-31G(d) level in the gas phase..... | S9  |
| <b>Figure S14.</b> The experiment ECD and the calculated spectra of <b>10</b> using three different methods. ....                    | S10 |
| <b>Figure S15.</b> Comparison of the <sup>1</sup> H NMR spectra of the ( <i>R/S</i> )-MPA esters of <b>10</b> . ....                 | S10 |
| <b>Figure S15-1.</b> Comparison of the <sup>1</sup> H NMR spectra of the ( <i>R/S</i> )-MPA esters of <b>10</b> (Expansion). ...     | S11 |
| <b>Figure S16.</b> Optimized geometries of the predominant conformers of <b>11</b> at the B3LYP/6-31G(d) level in the gas phase..... | S11 |
| <b>Figure S17.</b> The experiment ECD and the calculated spectra of <b>11</b> using three different methods. ....                    | S12 |
| <b>Figure S18.</b> Optimized geometries of the predominant conformers of <b>12</b> at the B3LYP/6-31G(d) level in the gas phase..... | S12 |
| <b>Figure S19.</b> Optimized geometries of the predominant conformers of <b>13</b> at the B3LYP/6-31G(d) level in the gas phase..... | S12 |
| <b>Figure S20.</b> The experiment ECD and the calculated spectra of <b>13</b> using three different methods. ....                    | S13 |
| <b>Figure S21.</b> Optimized geometries of the predominant conformers of <b>14</b> at the B3LYP/6-31G(d) level in the gas phase..... | S13 |
| <b>NMR, HRMS spectra of the compounds</b> .....                                                                                      | S14 |

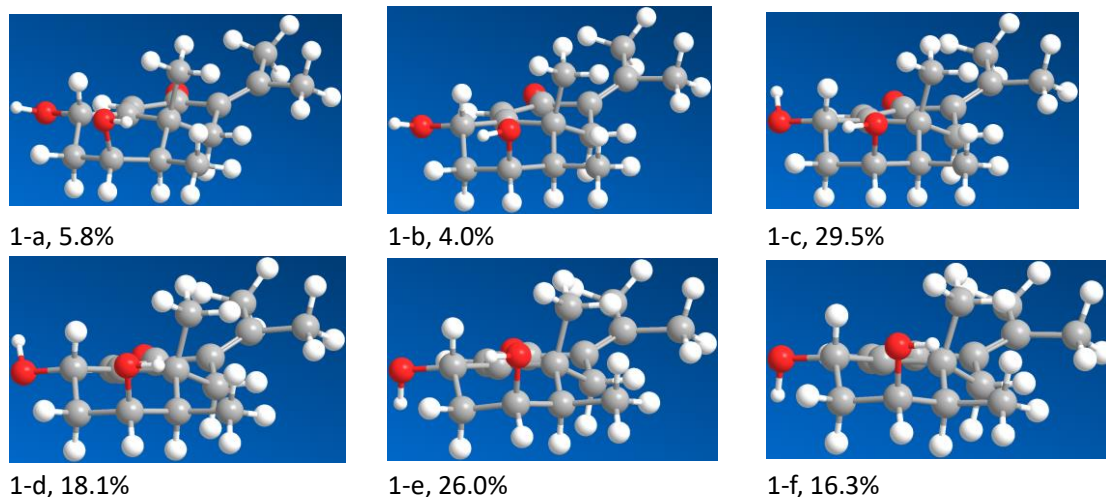

**Figure S1.** Optimized geometries of the predominant conformers of **1** at the B3LYP/6-31G(d) level in the gas phase.

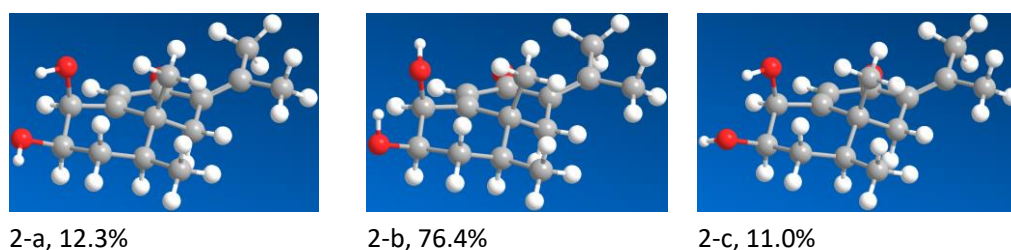

**Figure S2.** Optimized geometries of the predominant conformers of **2** at the B3LYP/6-31G(d) level in the gas phase.

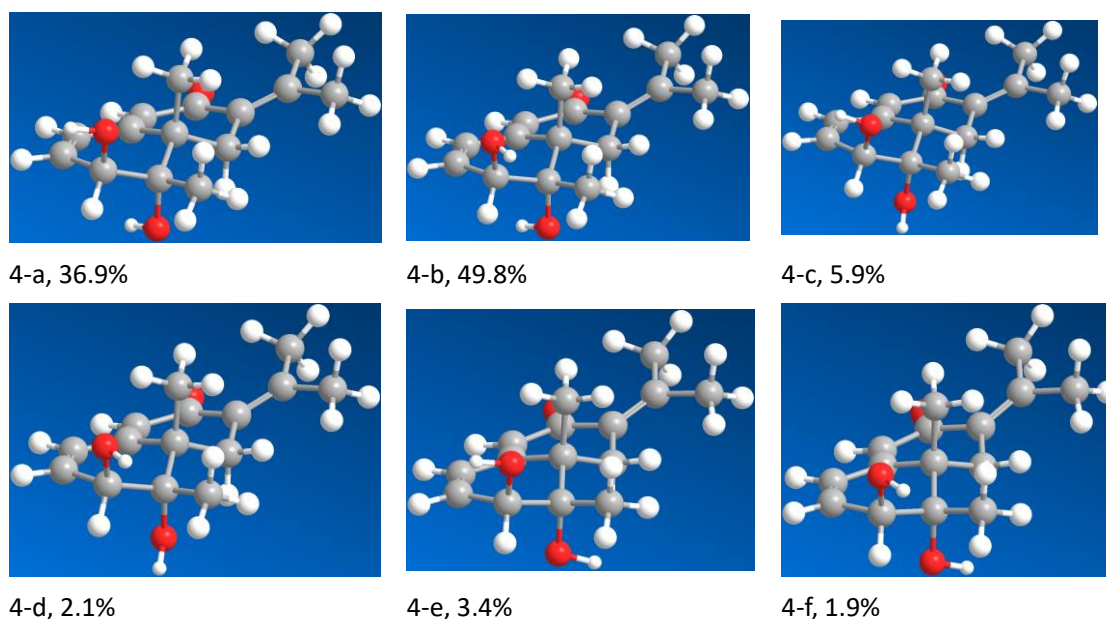

**Figure S3.** Optimized geometries of the predominant conformers of **4** at the B3LYP/6-31G(d) level in the gas phase.

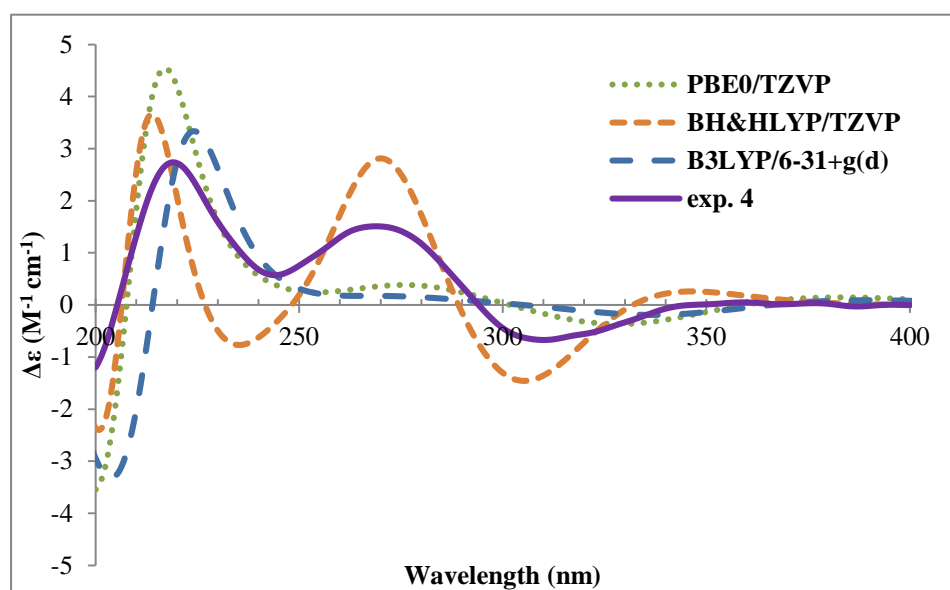

**Figure S4.** The experiment ECD and the calculated spectra of **4** using three different methods.

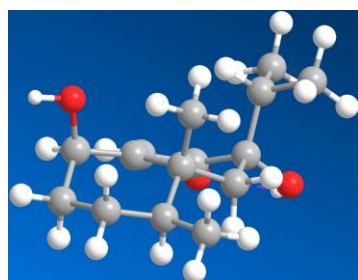

5-a, 9.9%

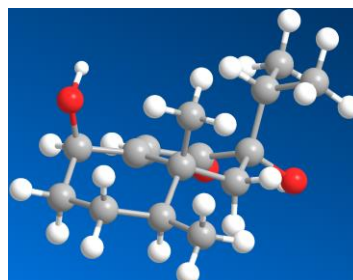

5-b, 90.1%

**Figure S5.** Optimized geometries of the predominant conformers of **5** at the B3LYP/6-31G(d) level in the gas phase.



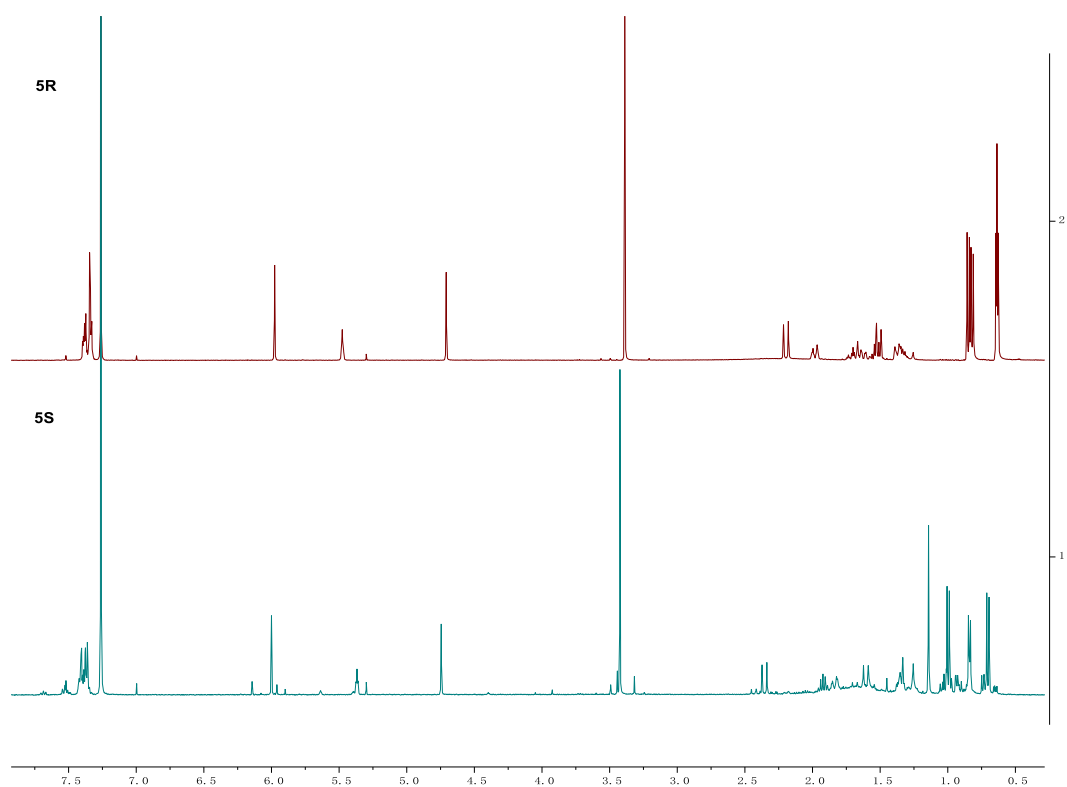

**Figure S6.** Comparison of the  $^1\text{H}$  NMR spectra of the (*R/S*)-MPA esters of **5**.

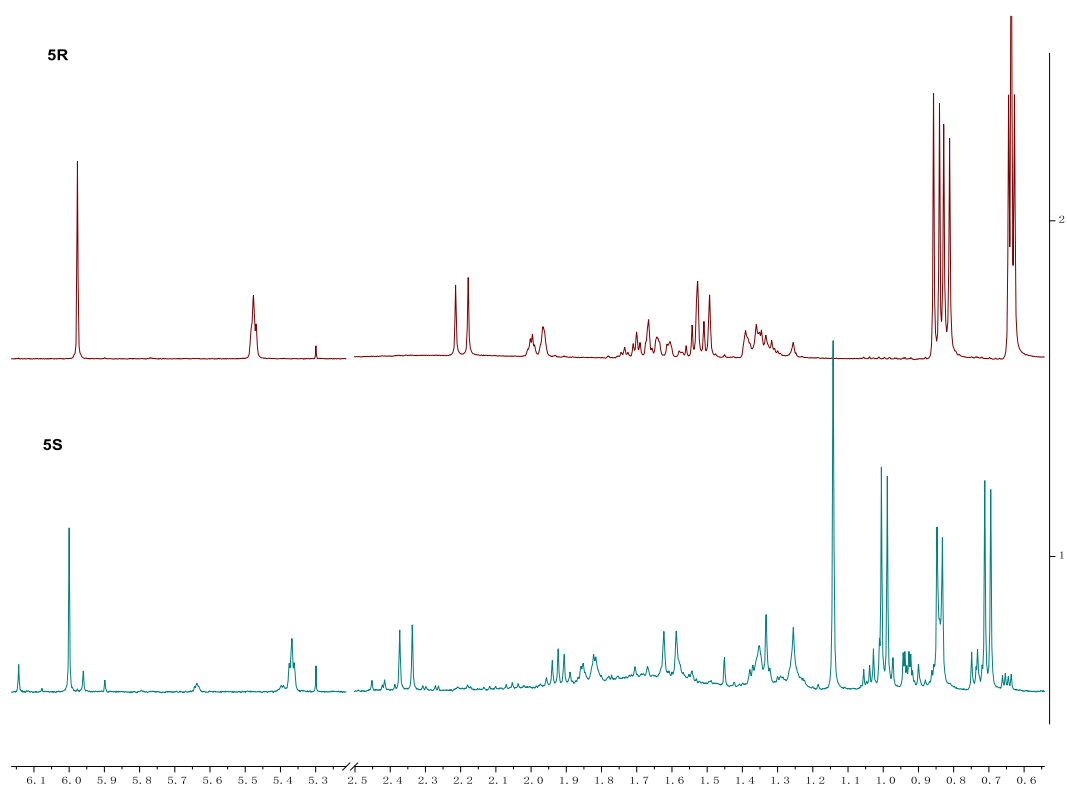

**Figure S6-1.** Comparison of the  $^1\text{H}$  NMR spectra of the (*R/S*)-MPA esters of **5** (Expansion).

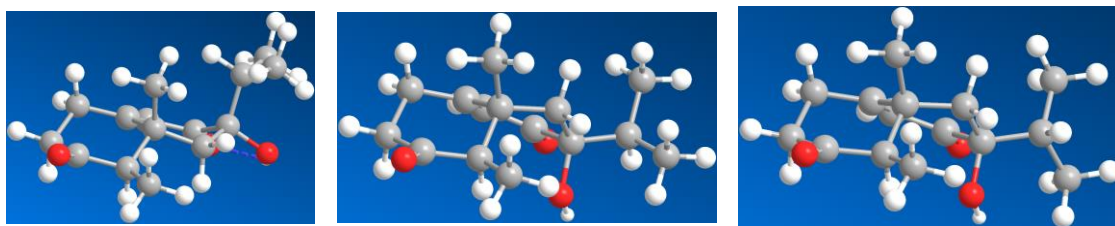

6-a, 75.2%

6-b, 23.4%

6-c, 1.1%

**Figure S7.** Optimized geometries of the predominant conformers of **6** at the B3LYP/6-31G(d) level in the gas phase.

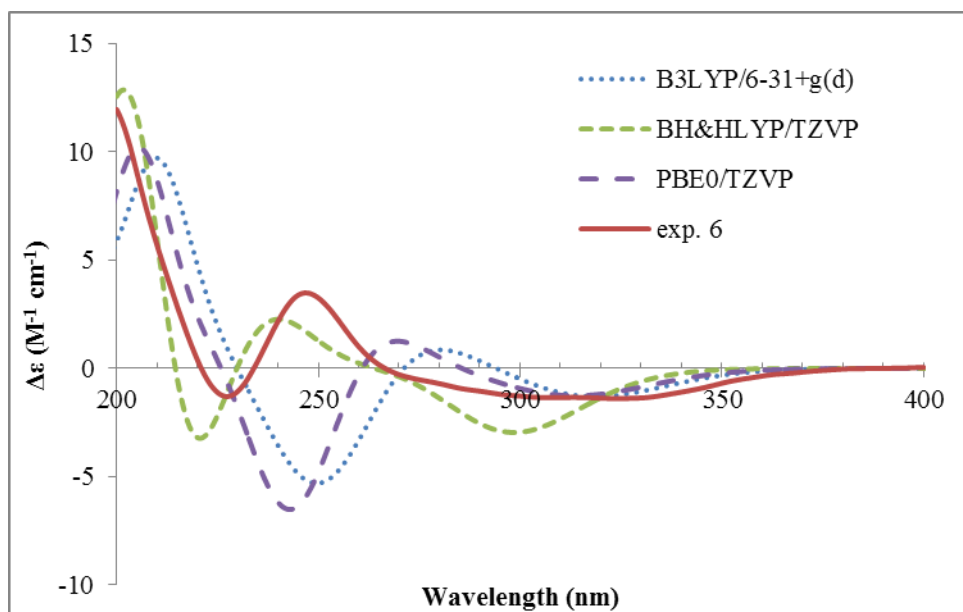

**Figure S8.** The experiment ECD and the calculated spectra of **6** using three different methods.

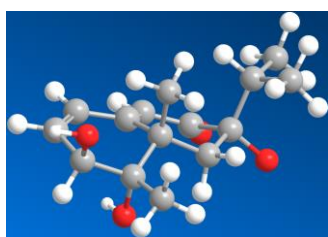

7-a, 12.0%

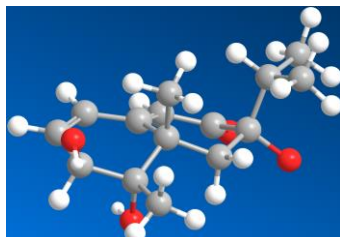

7-b, 32.4%

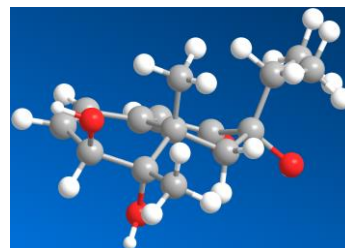

7-c, 2.6%

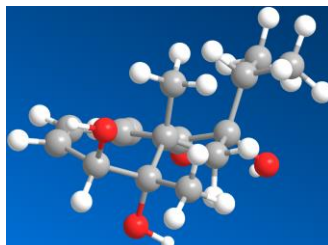

7-d, 2.4%

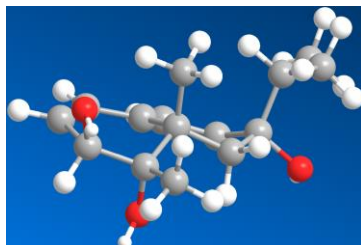

7-e, 2.1%

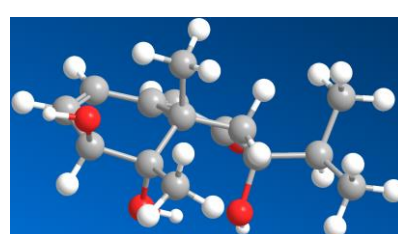

7-f, 11.5%

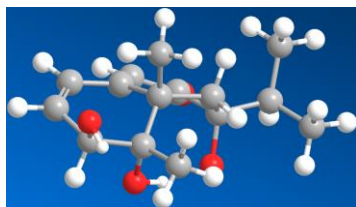

7-g, 32.4%

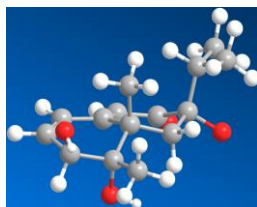

7-h, 4.3%

**Figure S9.** Optimized geometries of the predominant conformers of **7** at the B3LYP/6-31G(d) level in the gas phase.

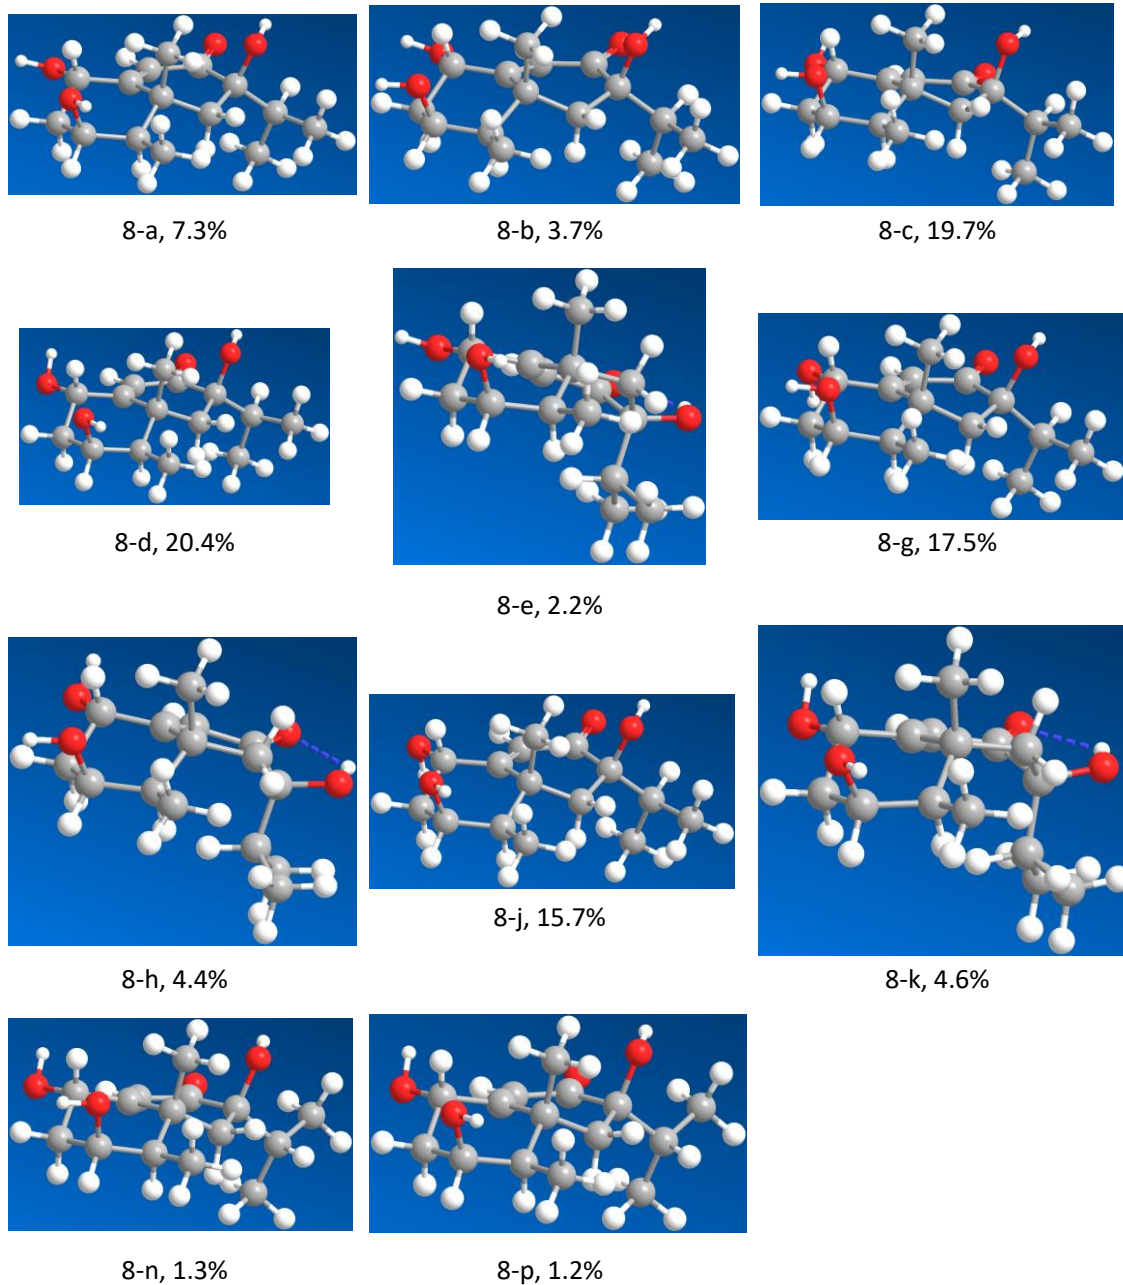

**Figure S10.** Optimized geometries of the predominant conformers of **8** at the B3LYP/6-31G(d) level in the gas phase.

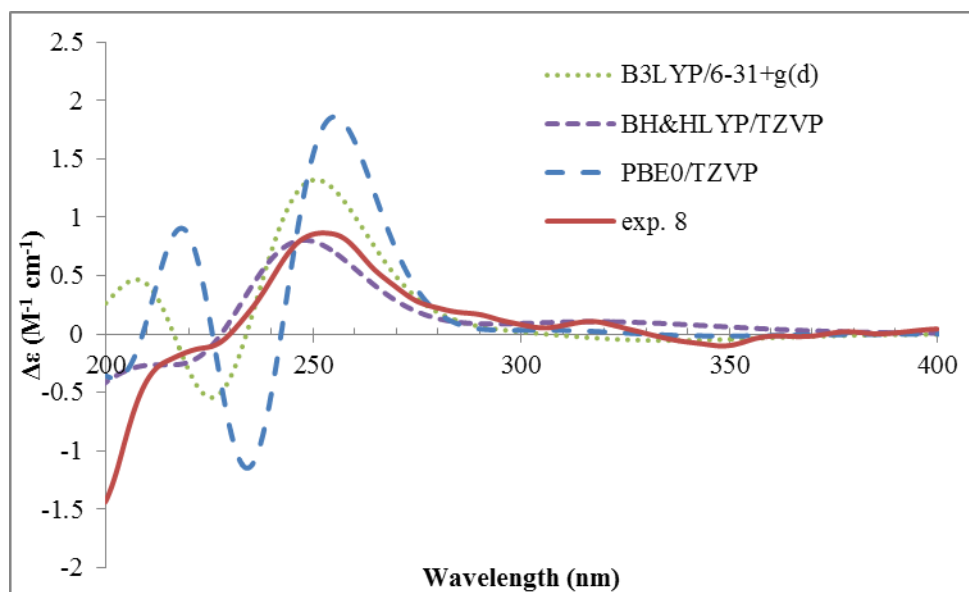

**Figure S11.** The experiment ECD and the calculated spectra of **8** using three different methods.

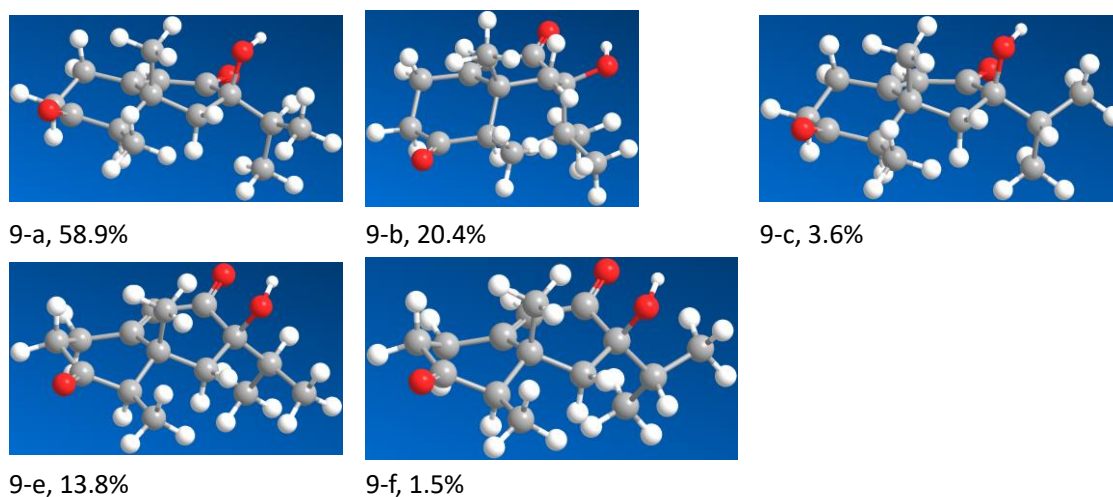

**Figure S12.** Optimized geometries of the predominant conformers of **9** at the B3LYP/6-31G(d) level in the gas phase.

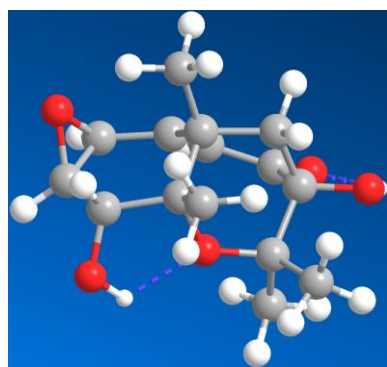

10-a, 100%

**Figure S13.** Optimized geometries of the predominant conformers of **10** at the B3LYP/6-31G(d) level in the gas phase.

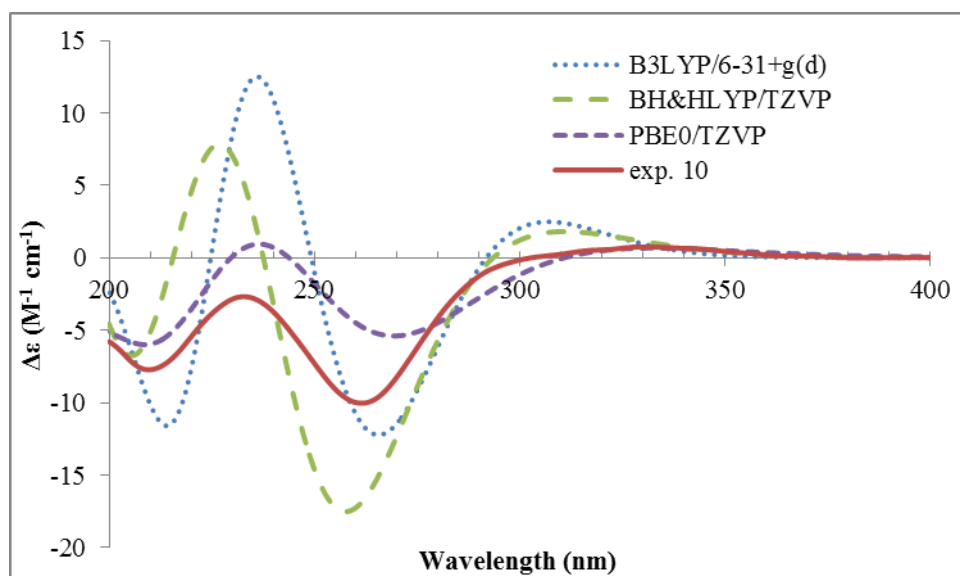

**Figure S14.** The experiment ECD and the calculated spectra of **10** using three different methods.

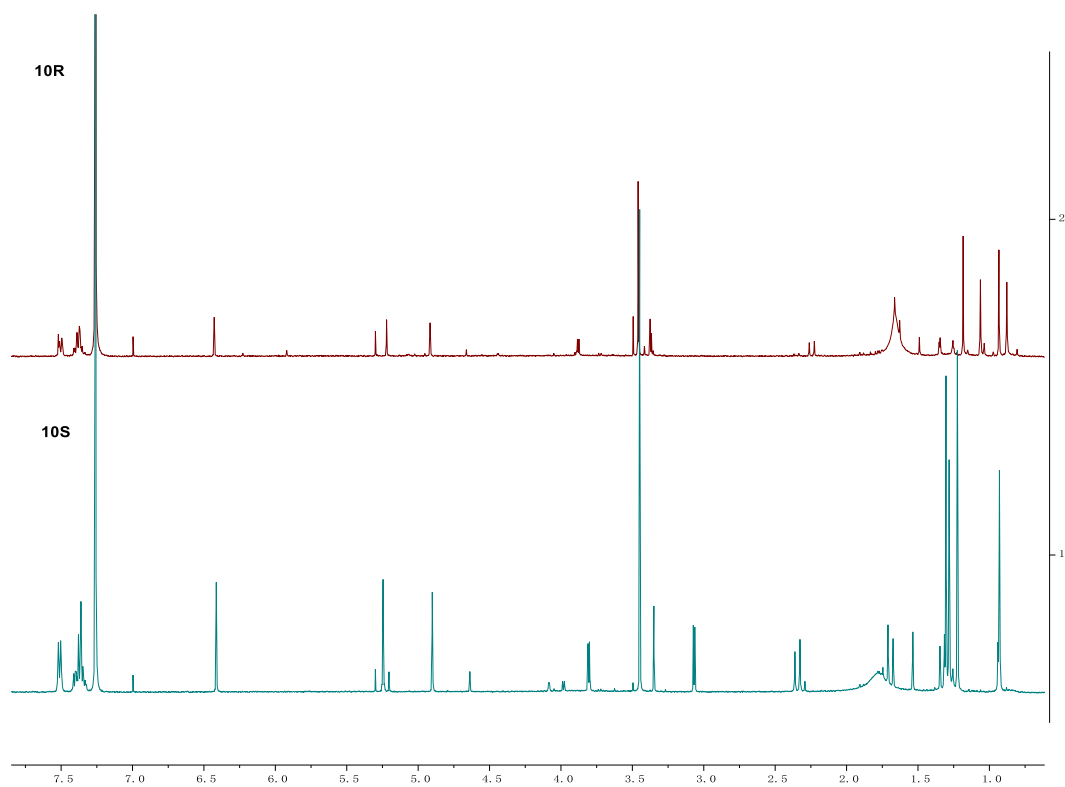

**Figure S15.** Comparison of the  $^1\text{H}$  NMR spectra of the (*R/S*)-MPA esters of **10**.

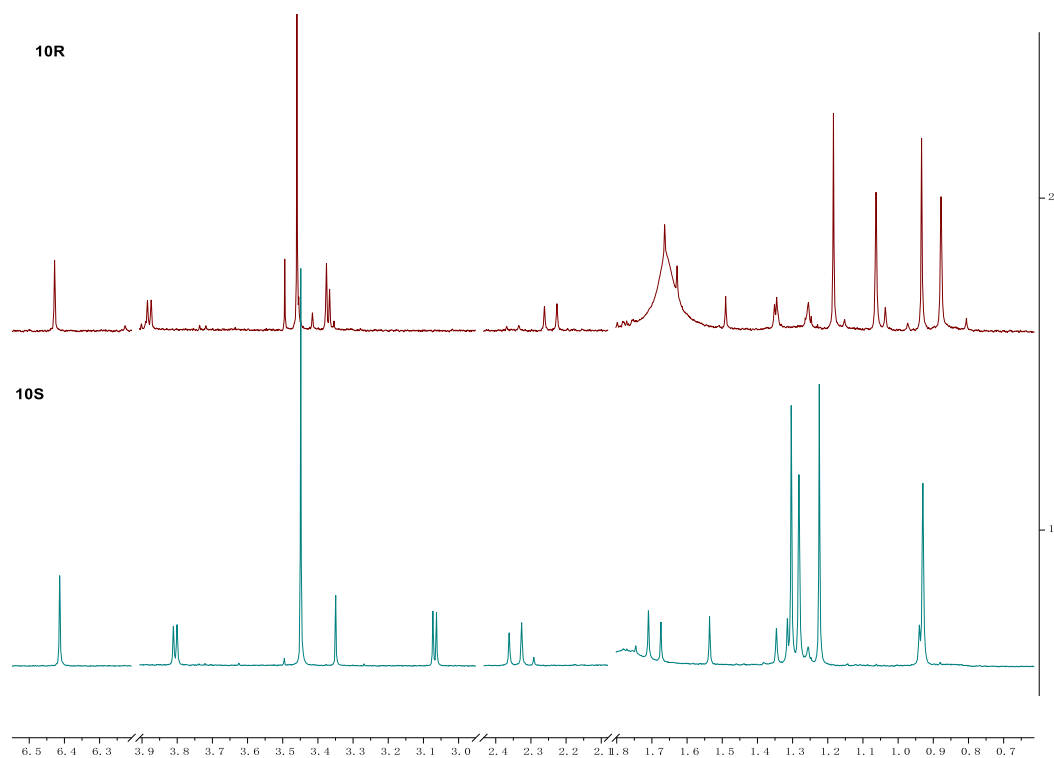

**Figure S15-1.** Comparison of the  $^1\text{H}$  NMR spectra of the (*R/S*)-MPA esters of **10** (Expansion).

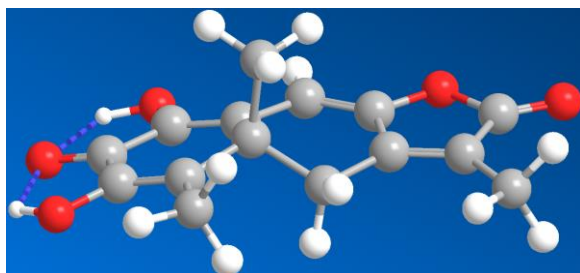

**11-a**, 100%.

**Figure S16.** Optimized geometries of the predominant conformers of **11** at the B3LYP/6-31G(d) level in the gas phase.

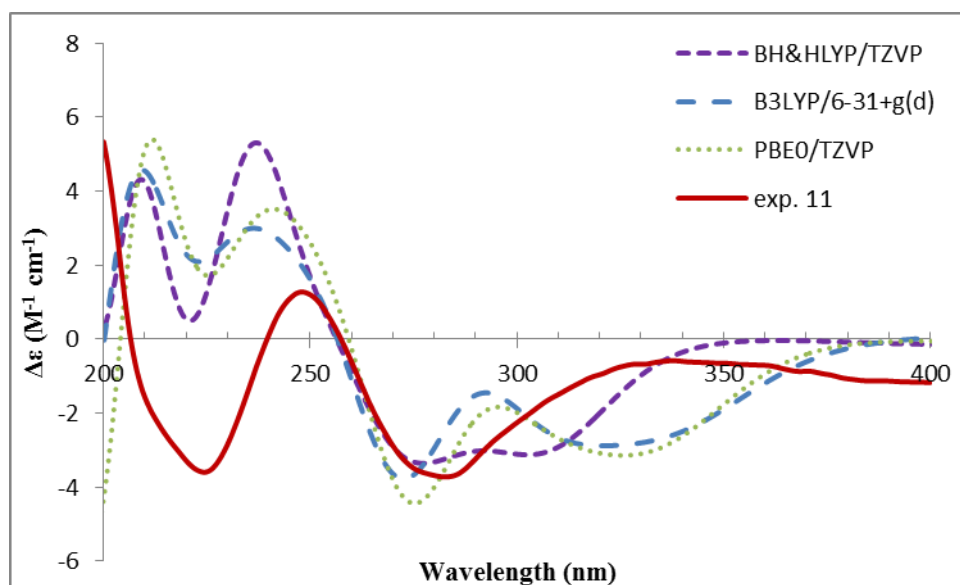

**Figure S17.** The experiment ECD and the calculated spectra of **11** using three different methods.

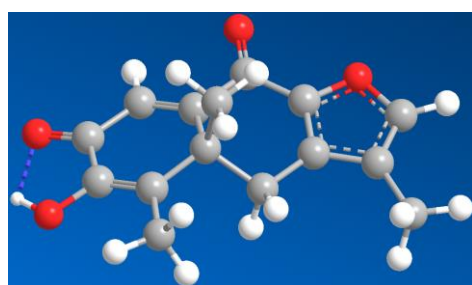

12-a, 100%

**Figure S18.** Optimized geometries of the predominant conformers of **12** at the B3LYP/6-31G(d) level in the gas phase.

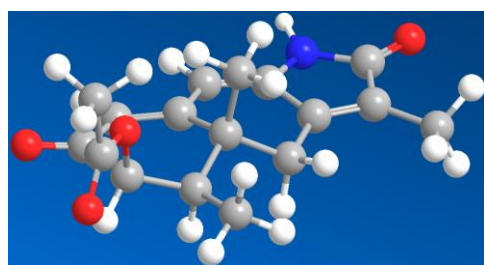

13-a, 100%

**Figure S19.** Optimized geometries of the predominant conformers of **13** at the B3LYP/6-31G(d) level in the gas phase.



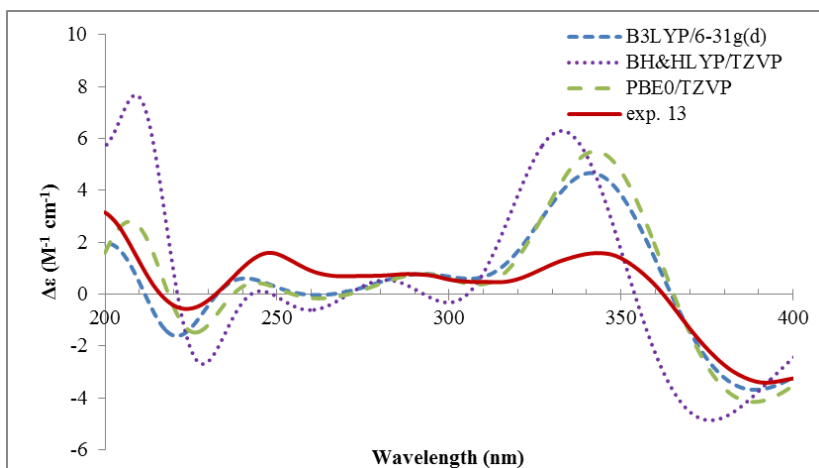

**Figure S20.** The experiment ECD and the calculated spectra of **13** using three different methods.

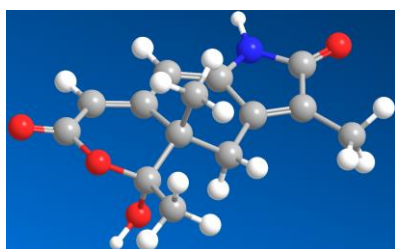

14-a, 85.3%

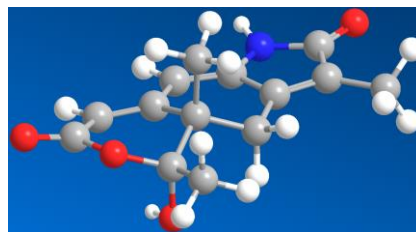

14-b, 14.7%

**Figure S21.** Optimized geometries of the predominant conformers of **14** at the B3LYP/6-31G(d) level in the gas phase.

## NMR, HRMS spectra of the compounds

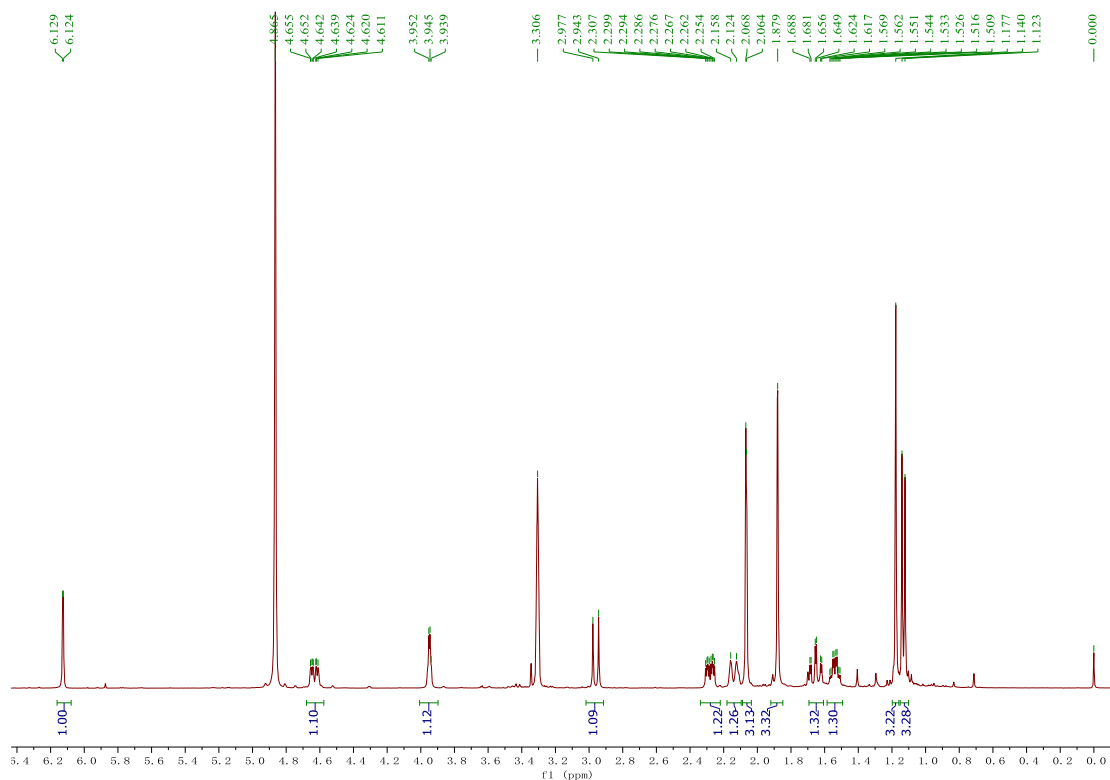

## <sup>1</sup>H NMR spectrum of **1**

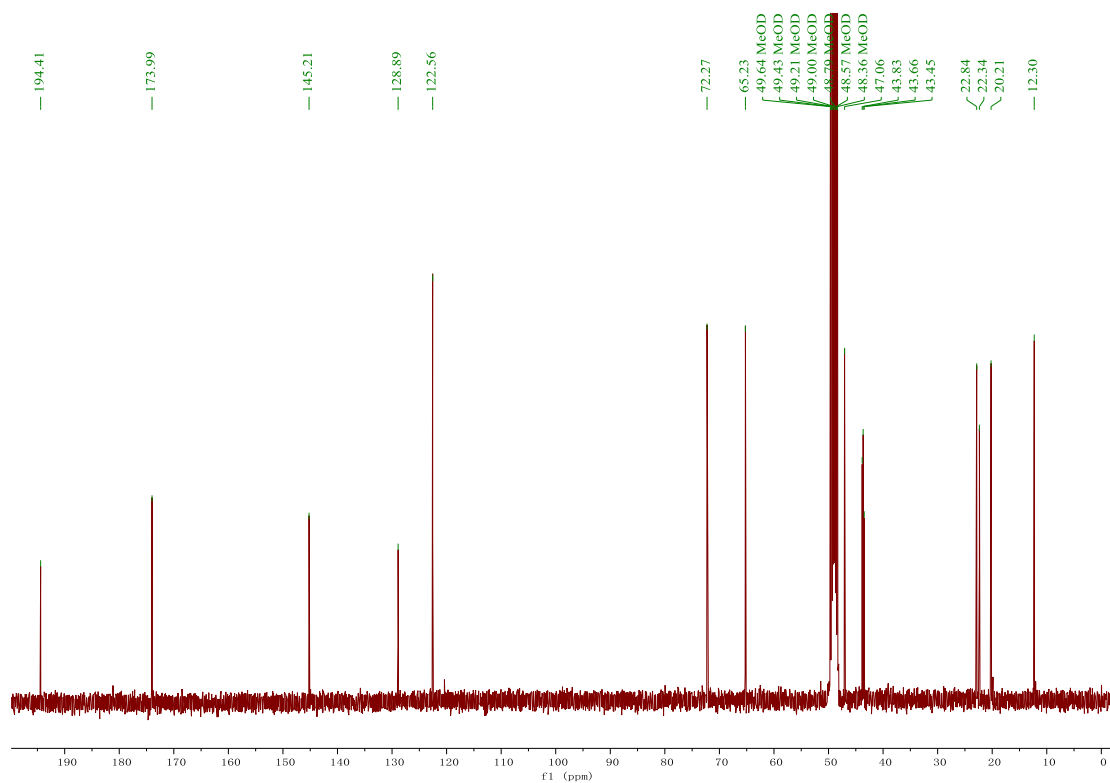

## <sup>13</sup>C NMR spectrum of **1**

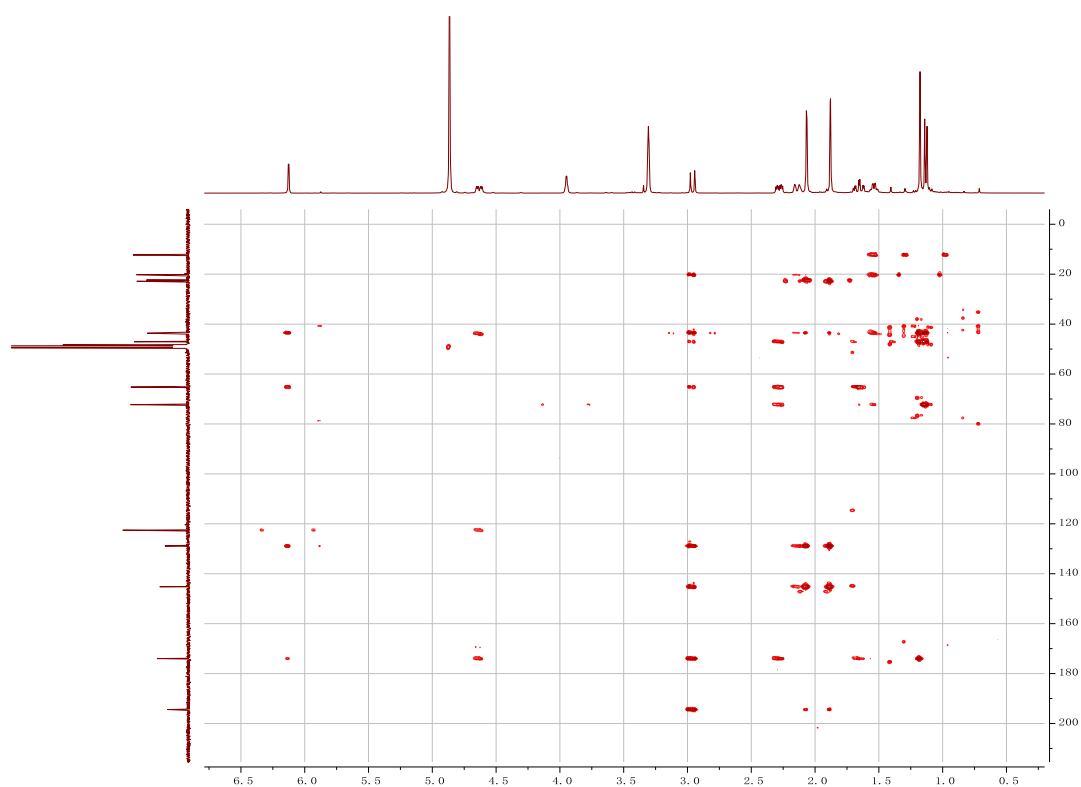

HMBC spectrum of **1**

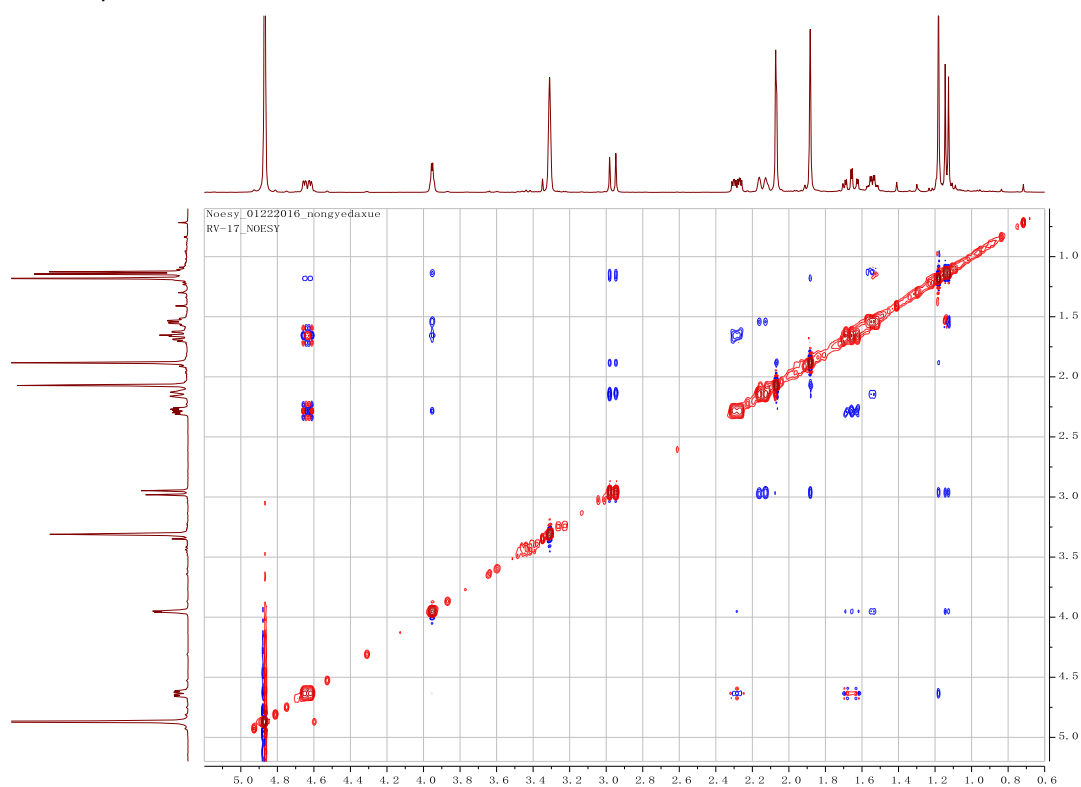

NOESY spectrum of **1**

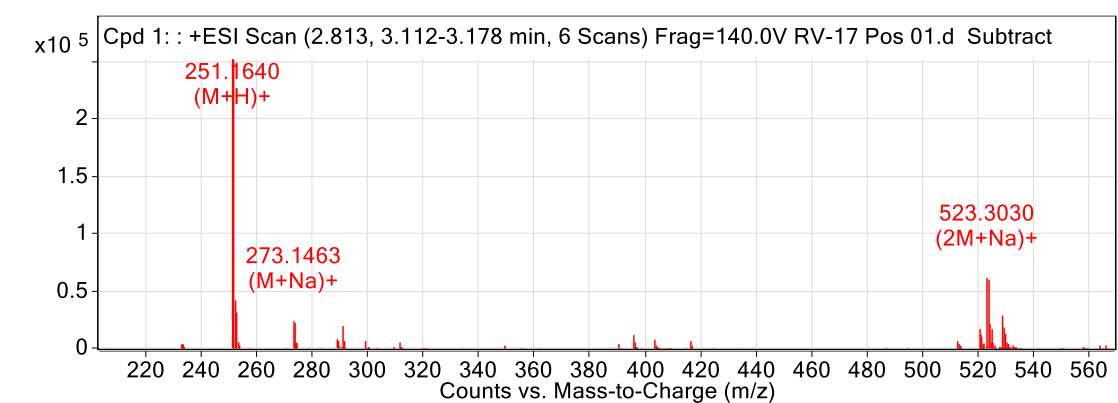

| $m/z$    | Calc $m/z$ | Diff(ppm) | $z$ | Abund    | Formula             | Ion         |
|----------|------------|-----------|-----|----------|---------------------|-------------|
| 251.1640 | 251.1642   | -0.8      | 1   | 252280.2 | $C_{15}H_{23}O_3$   | $(M+H)^+$   |
| 273.1463 | 273.1461   | 0.51      | 1   | 23876.4  | $C_{15}H_{22}NaO_3$ | $(M+Na)^+$  |
| 523.3030 | 523.303    | 0.01      | 1   | 61058.6  | $C_{30}H_{44}NaO_6$ | $(2M+Na)^+$ |

HRMS spectrum of **1**

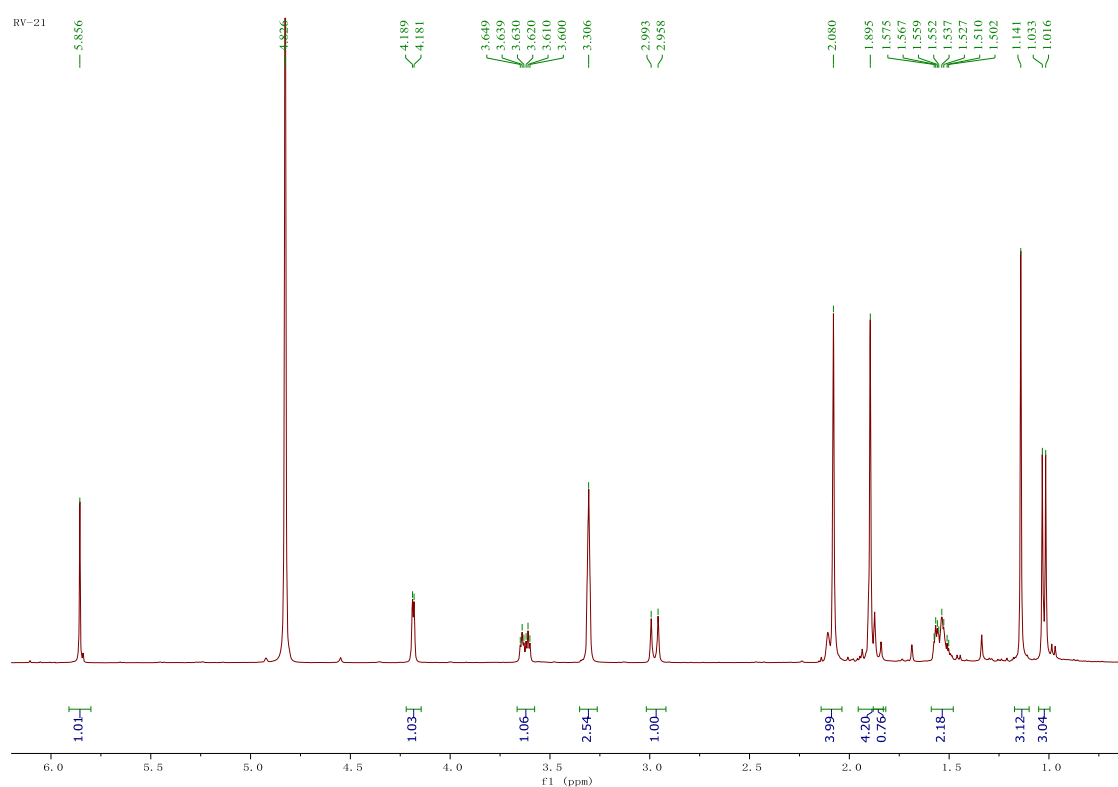

$^1H$  NMR spectrum of **2**

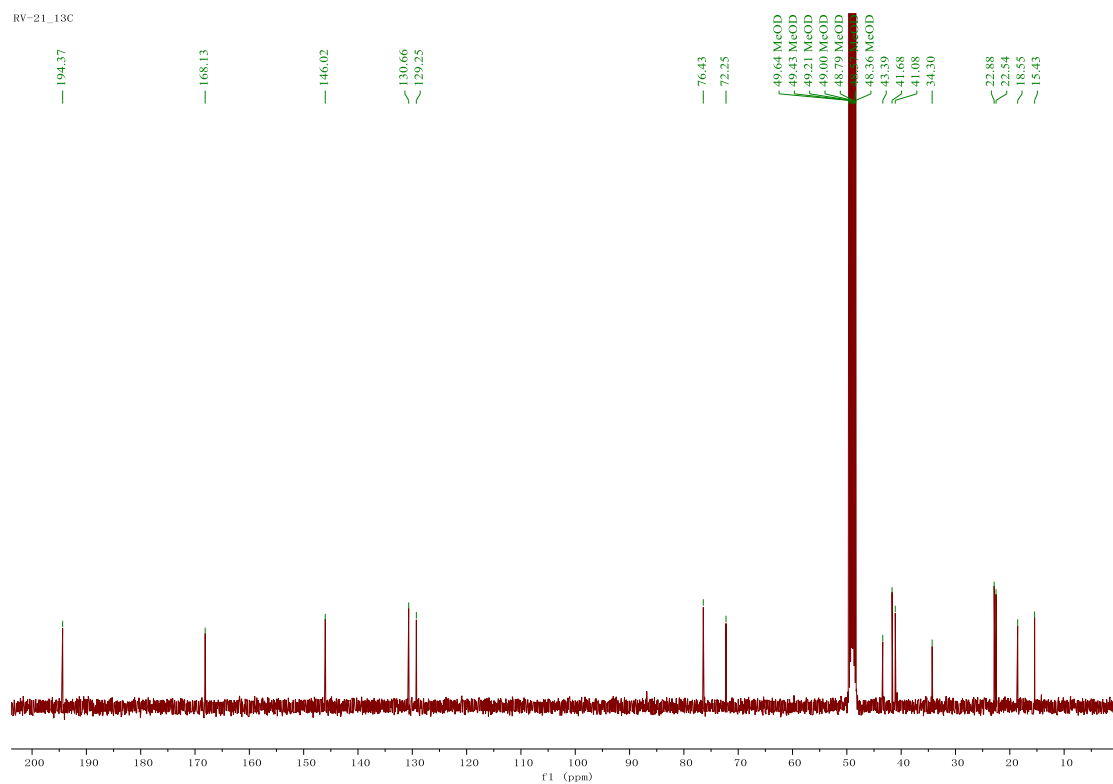

$^{13}\text{C}$  NMR spectrum of **2**

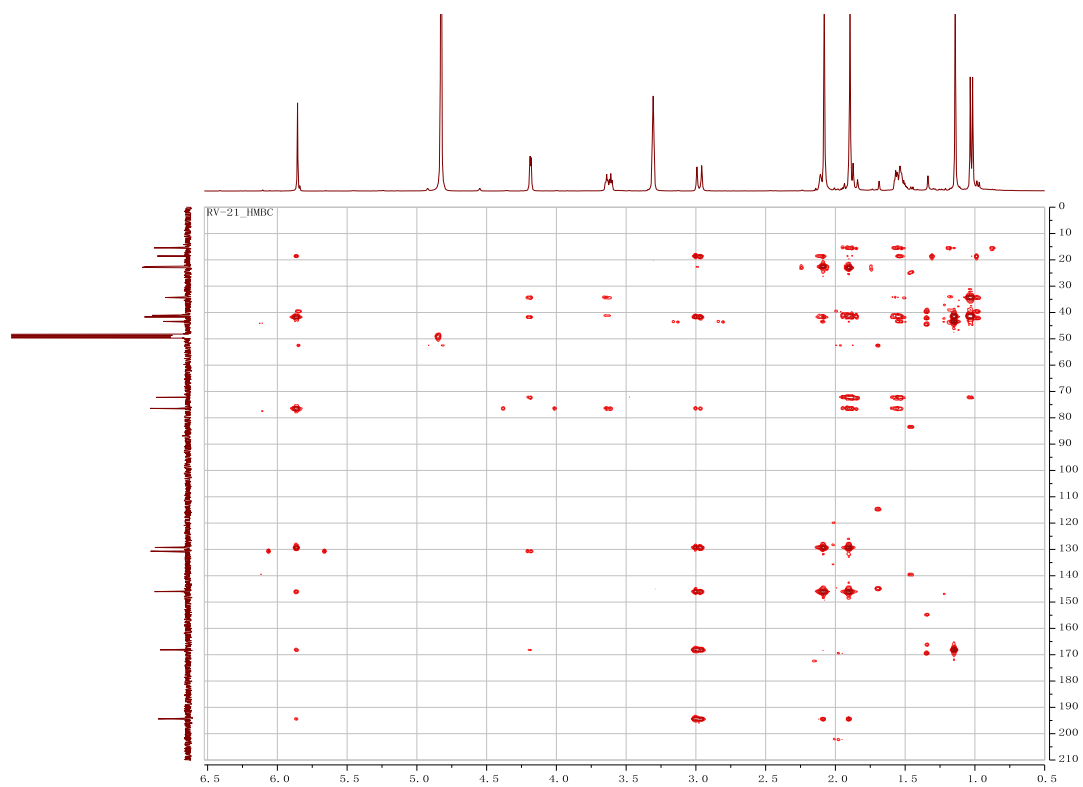

HMBC spectrum of **2**

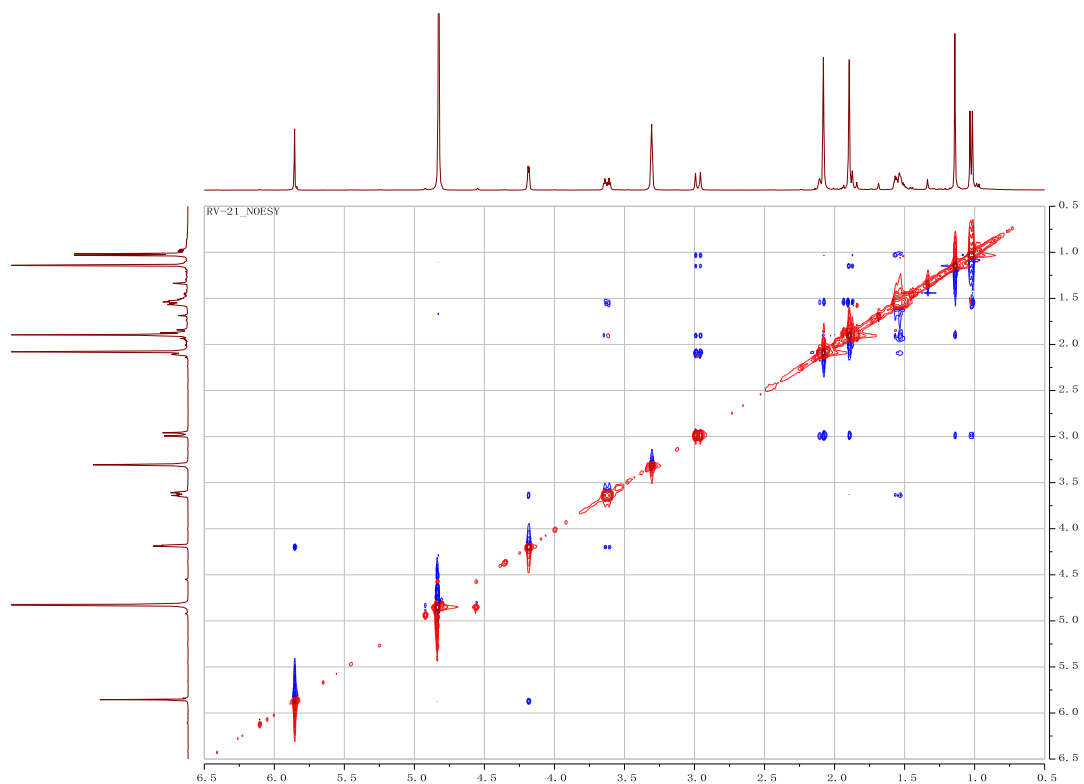

NOESY spectrum of **2**

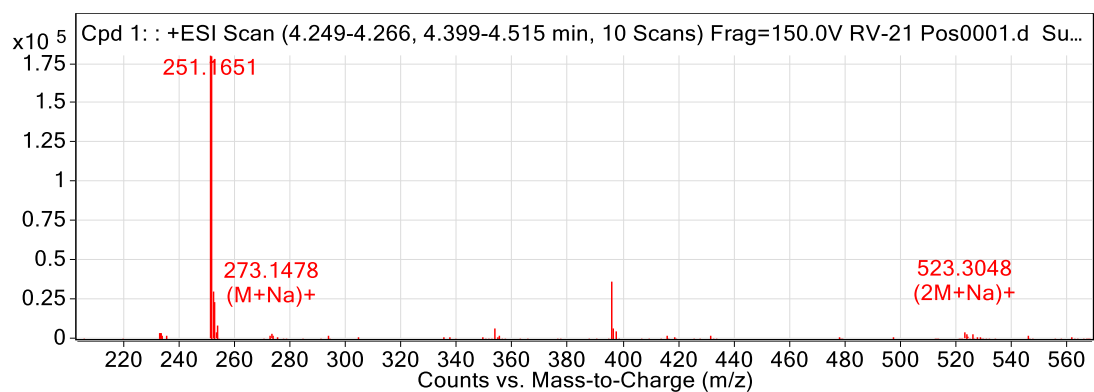

| <i>m/z</i> | <i>Calc m/z</i> | Diff(ppm) | <i>z</i> | Abund    | Formula                                        | Ion                |
|------------|-----------------|-----------|----------|----------|------------------------------------------------|--------------------|
| 251.1651   | 251.1642        | 3.76      | 1        | 180122.1 | C <sub>15</sub> H <sub>23</sub> O <sub>3</sub> | (M+H) <sup>+</sup> |

HRESIMS spectrum of **2**

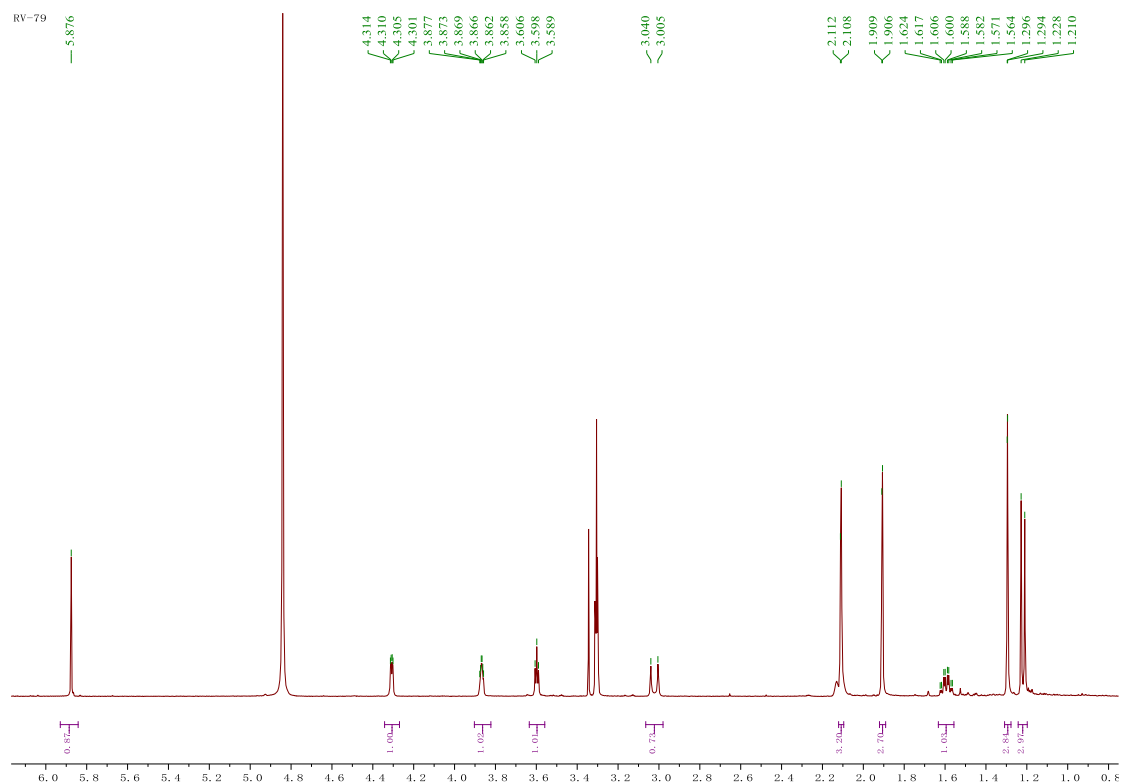

**$^1\text{H}$  NMR spectrum of **3****

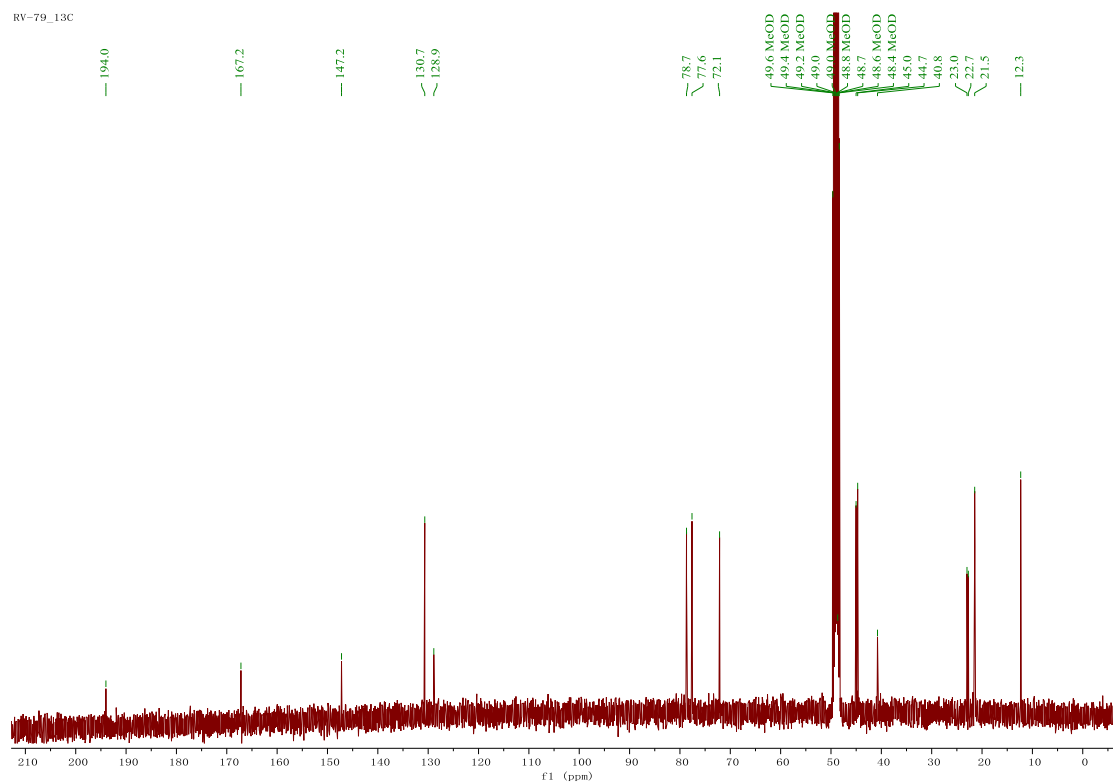

**$^{13}\text{C}$  NMR spectrum of **3****

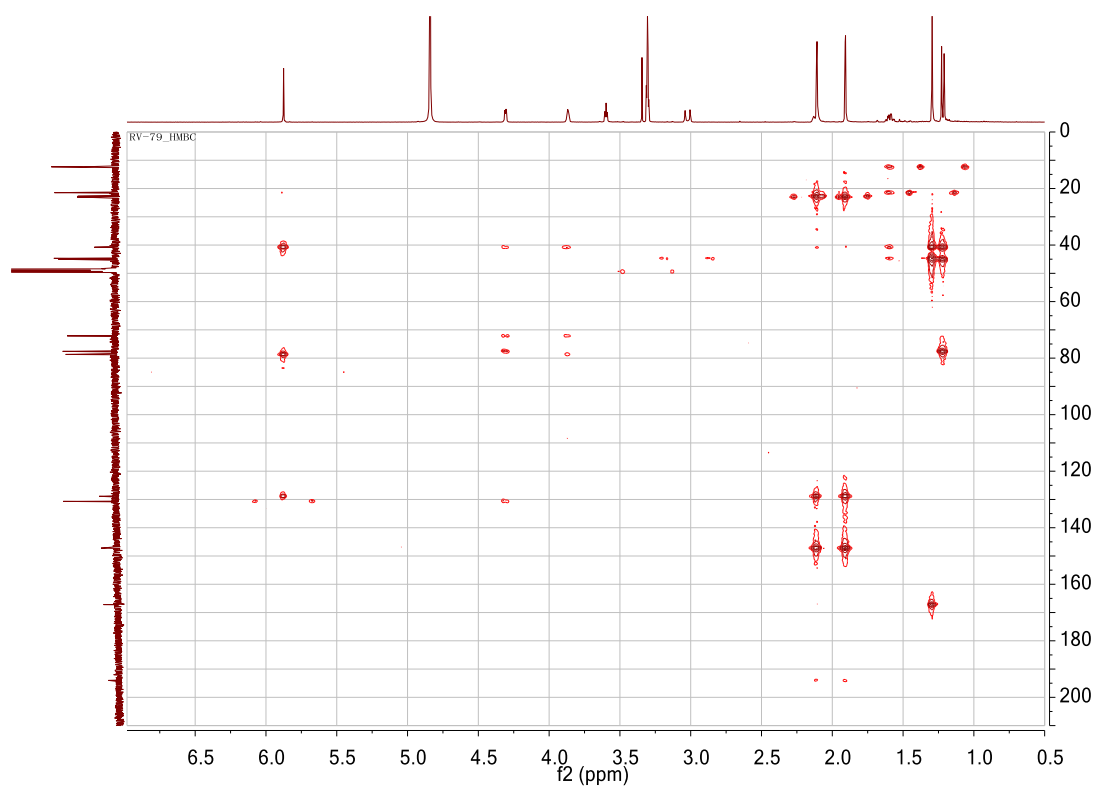

HMBC spectrum of **3**

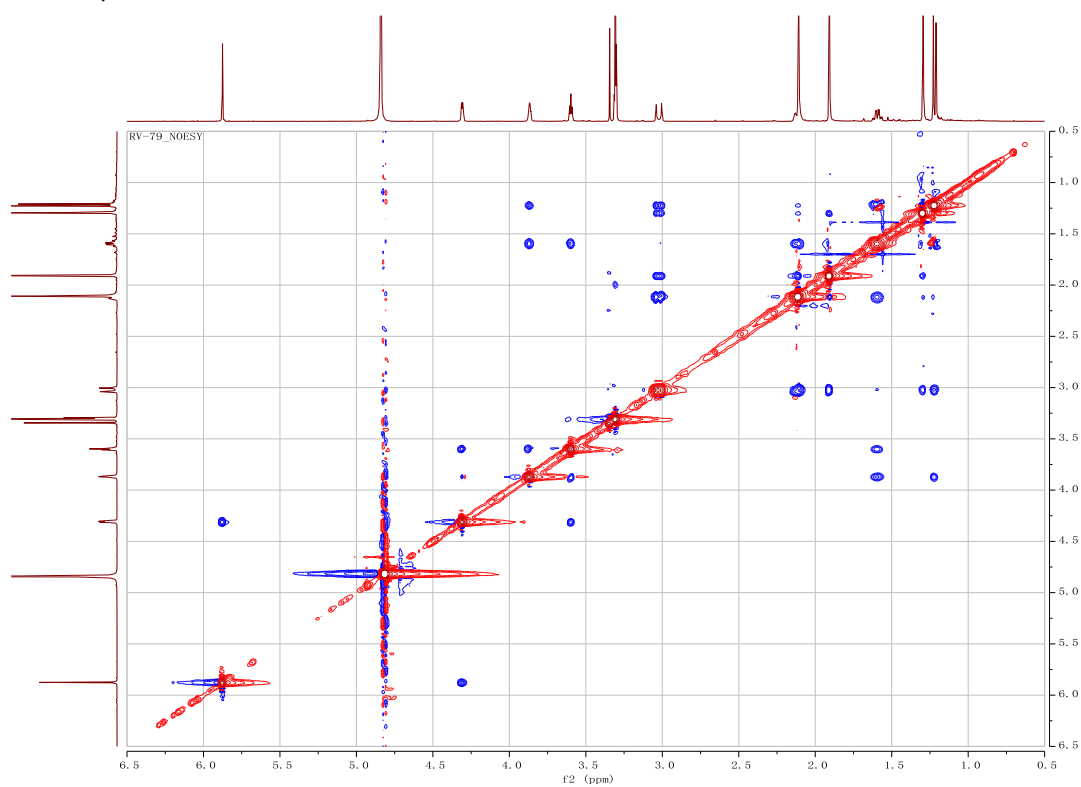

NOESY spectrum of **3**



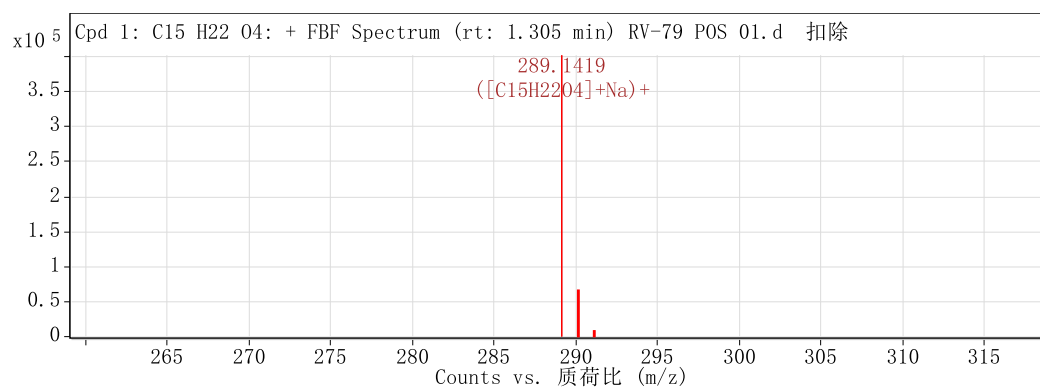

| <i>m/z</i> | <i>Calc m/z</i> | Diff(ppm) | <i>z</i> | Abund     | Formula                                           | Ion                  |
|------------|-----------------|-----------|----------|-----------|---------------------------------------------------|----------------------|
| 289.1419   | 289.1410        | 3.11      | 1        | 402304.38 | C <sub>15</sub> H <sub>22</sub> O <sub>4</sub> Na | (M+ Na) <sup>+</sup> |

### HRESIMS spectrum of **3**

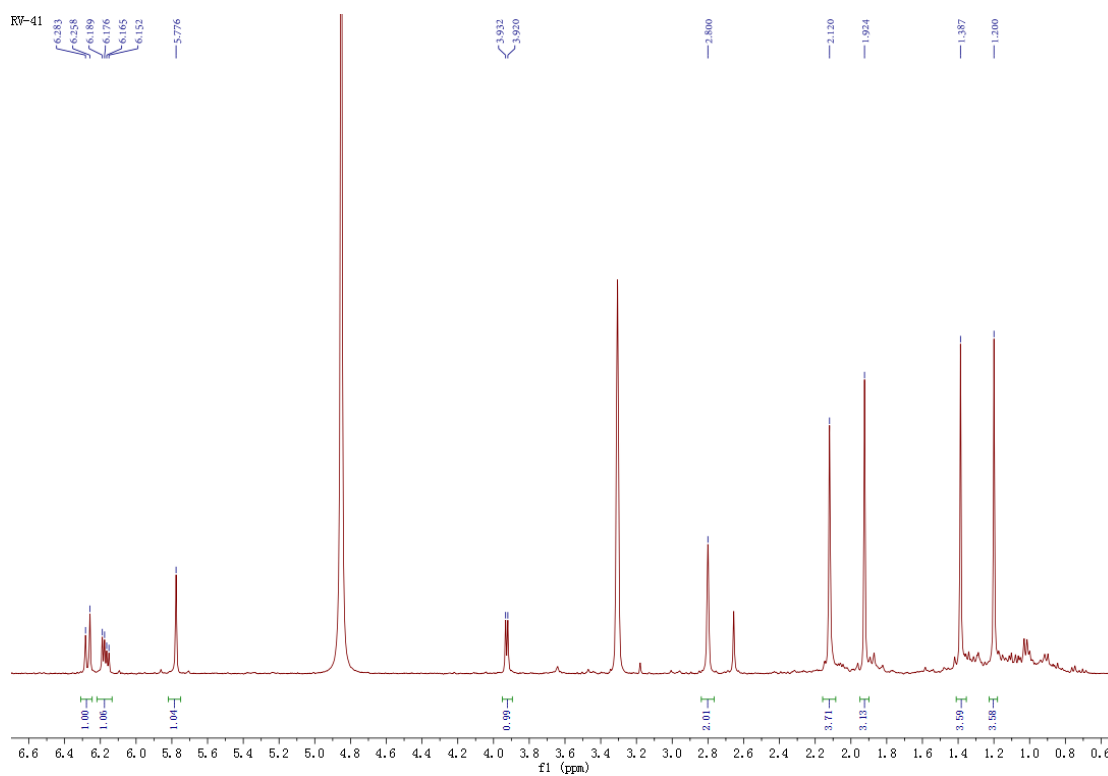

### <sup>1</sup>H NMR spectrum of **4**

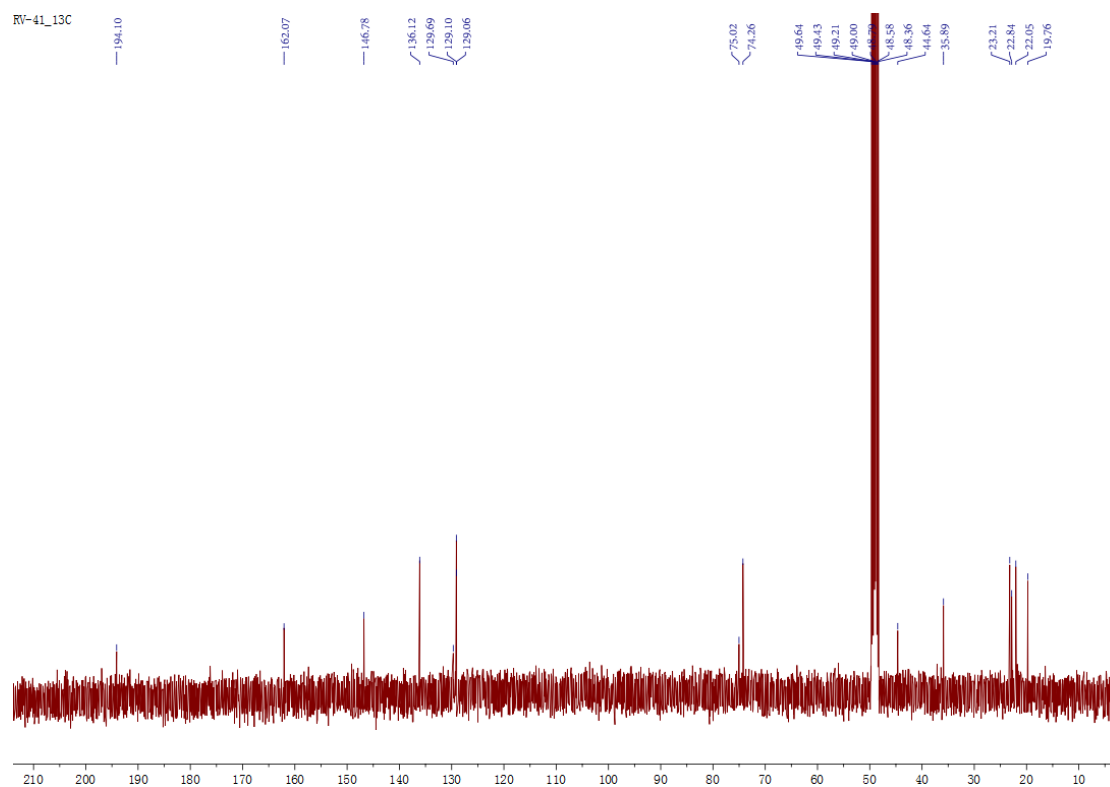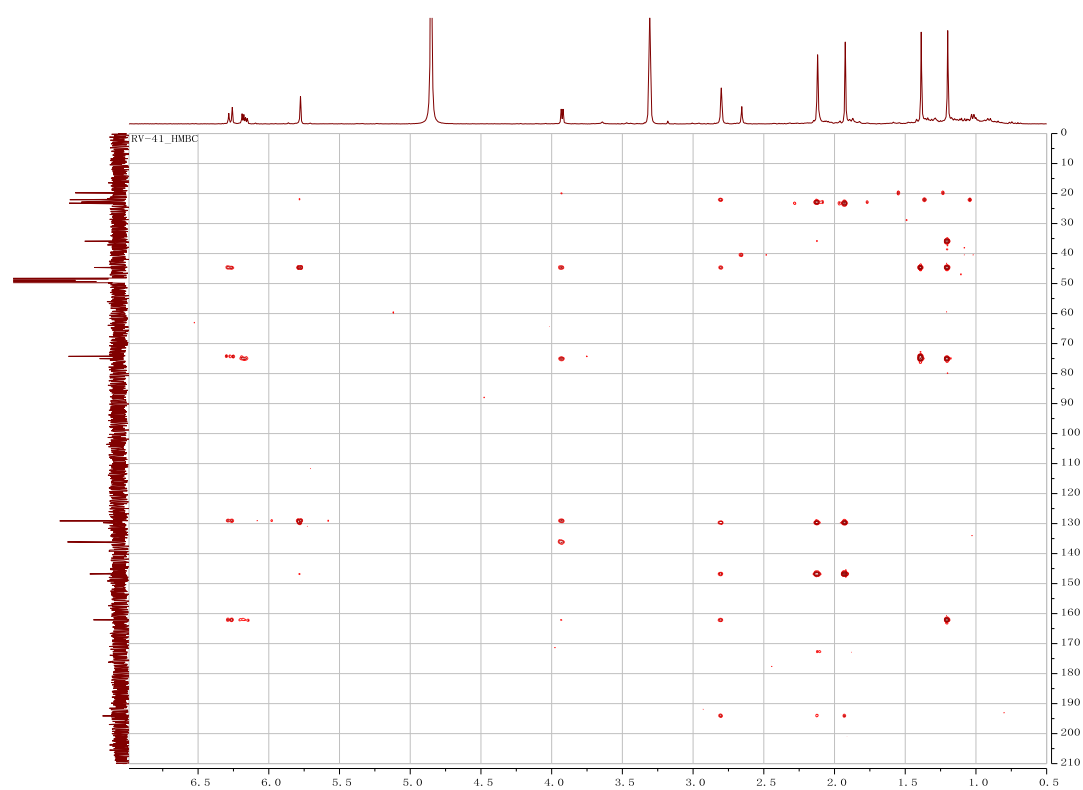

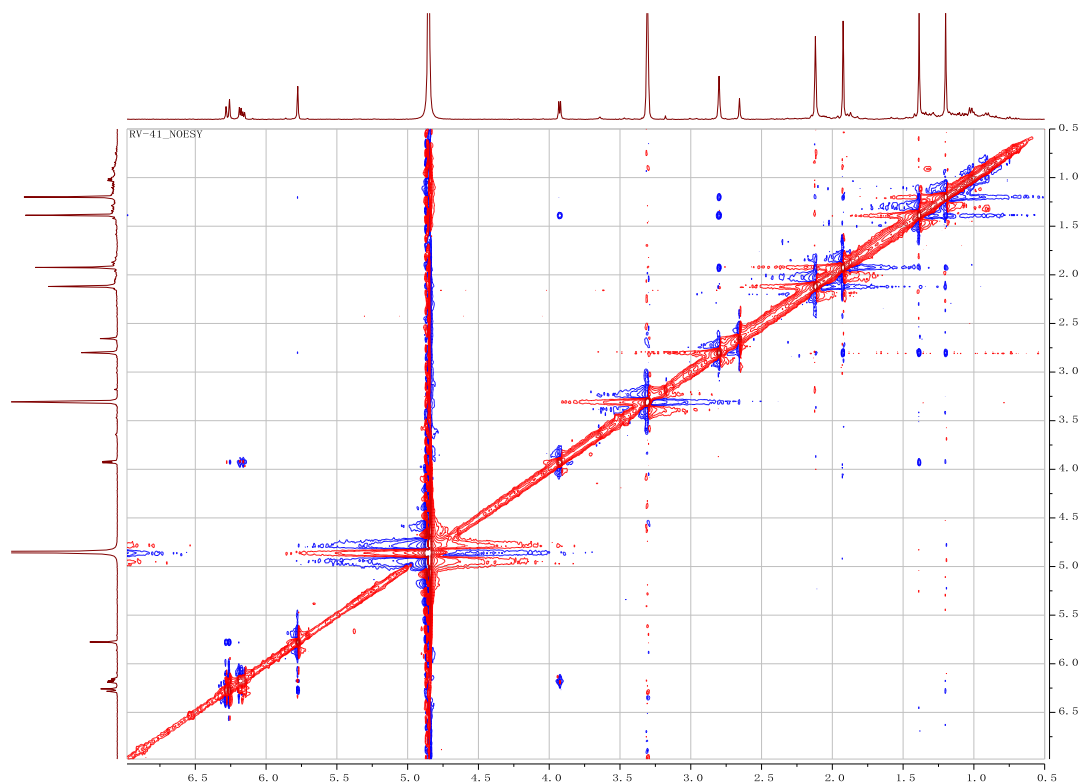

NOESY spectrum of **4**

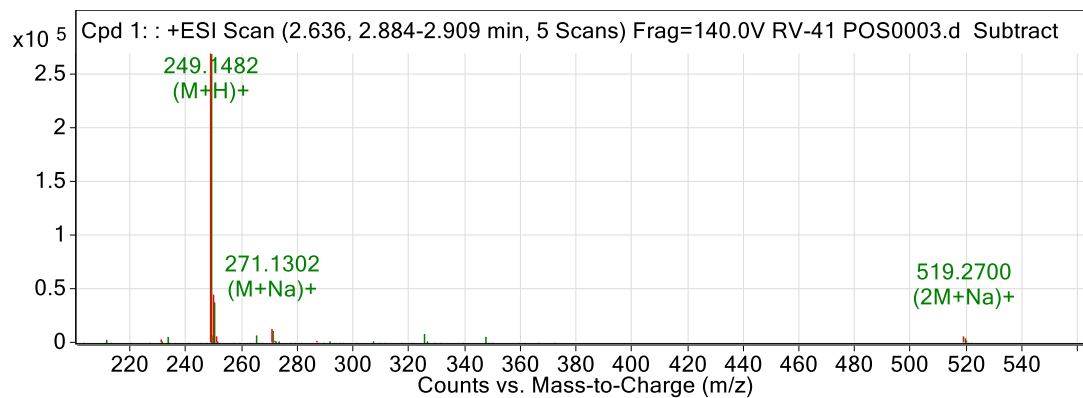

| <i>m/z</i> | <i>Calc m/z</i> | Diff(ppm) | <i>z</i> | Abund    | Formula                                          | Ion                 |
|------------|-----------------|-----------|----------|----------|--------------------------------------------------|---------------------|
| 249.1482   | 249.1485        | -1.33     |          | 270074.8 | C <sub>15</sub> H <sub>21</sub> O <sub>3</sub>   | (M+H) <sup>+</sup>  |
| 271.1302   | 271.1305        | -0.95     | 1        | 12518.7  | C <sub>15</sub> H <sub>20</sub> NaO <sub>3</sub> | (M+Na) <sup>+</sup> |

HRESIMS spectrum of **4**

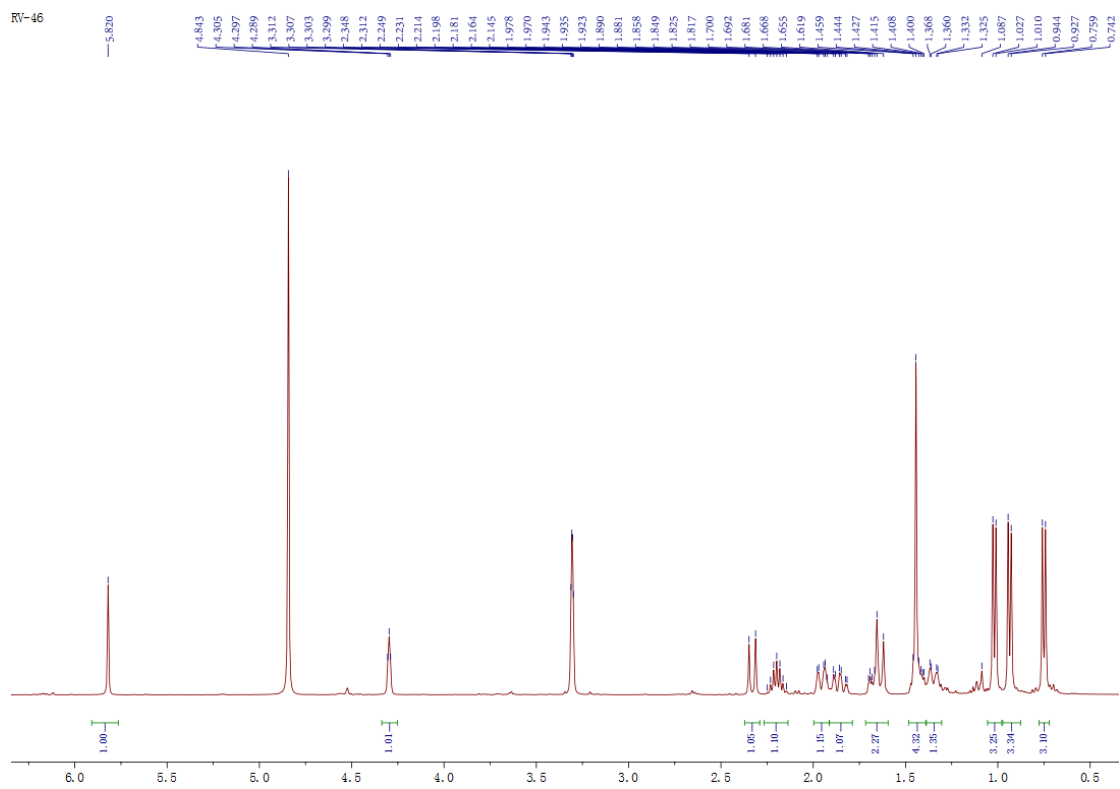

$^1\text{H}$  NMR spectrum of **5**

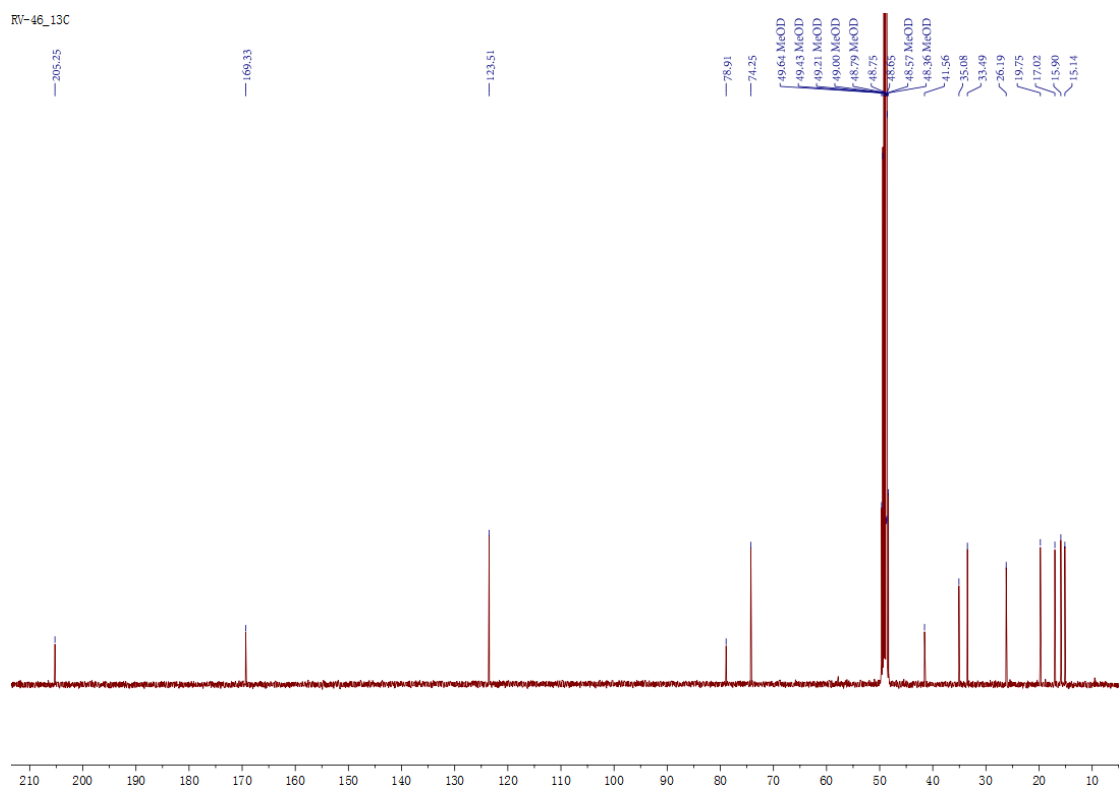

$^{13}\text{C}$  NMR spectrum of **5**

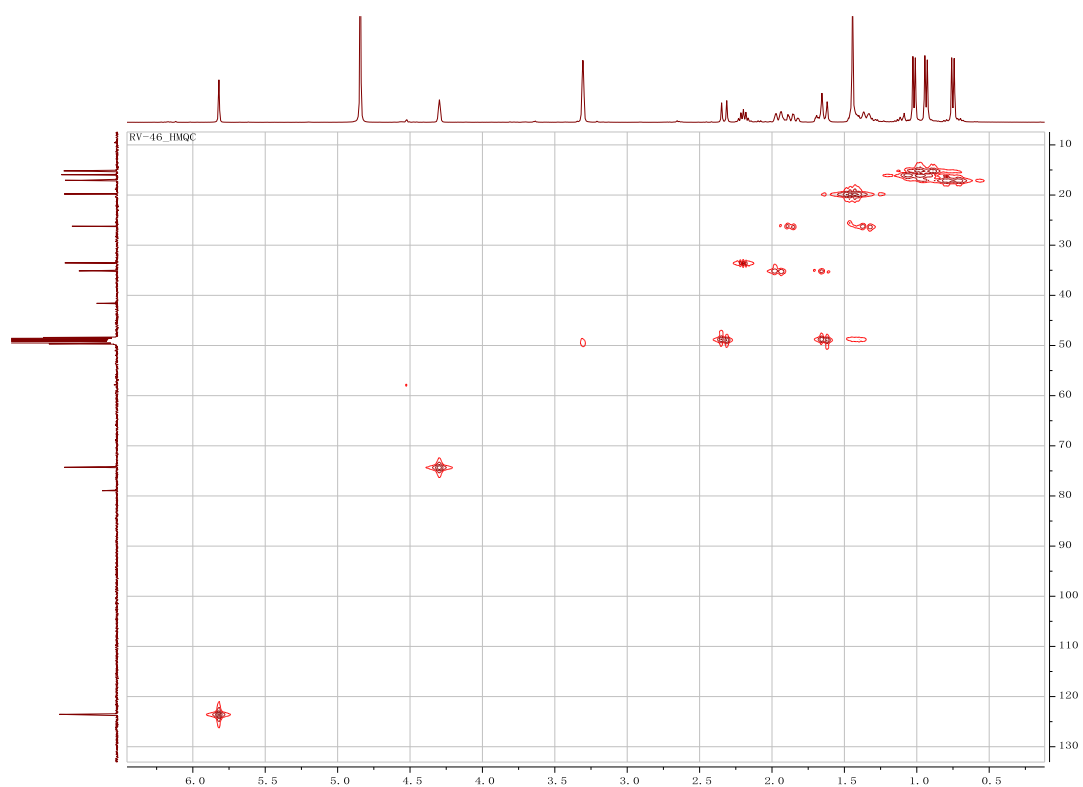

HMQC spectrum of **5**

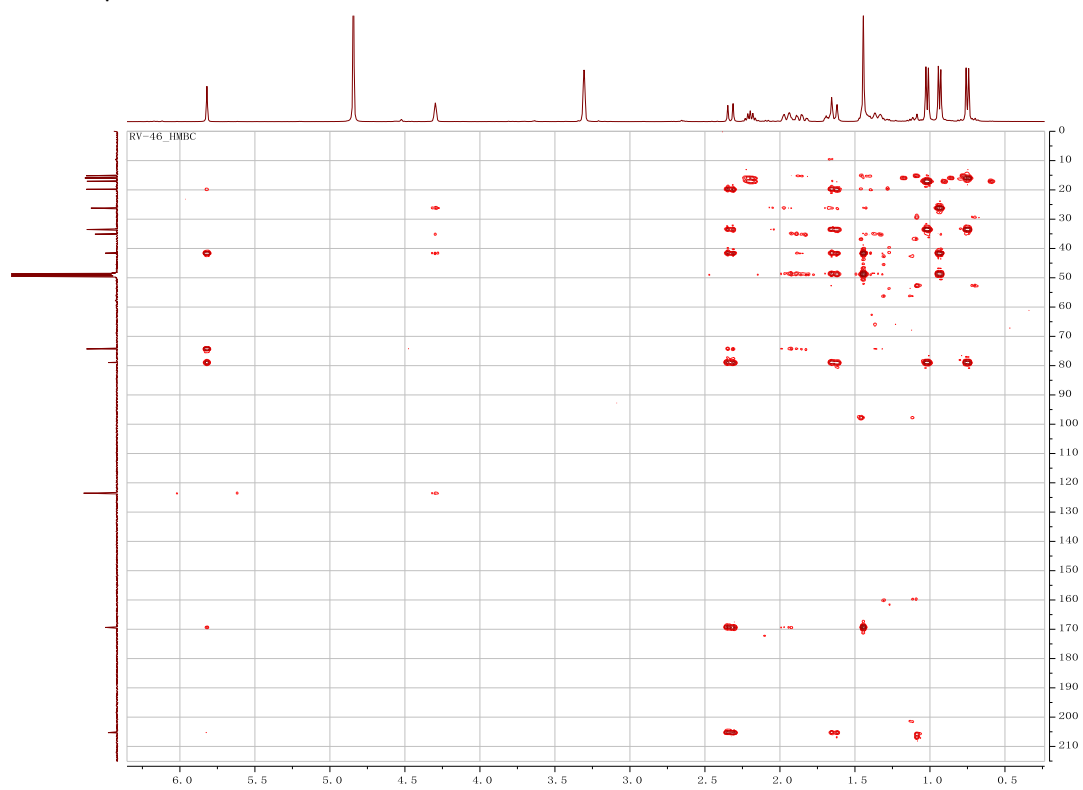

HMBC spectrum of **5**

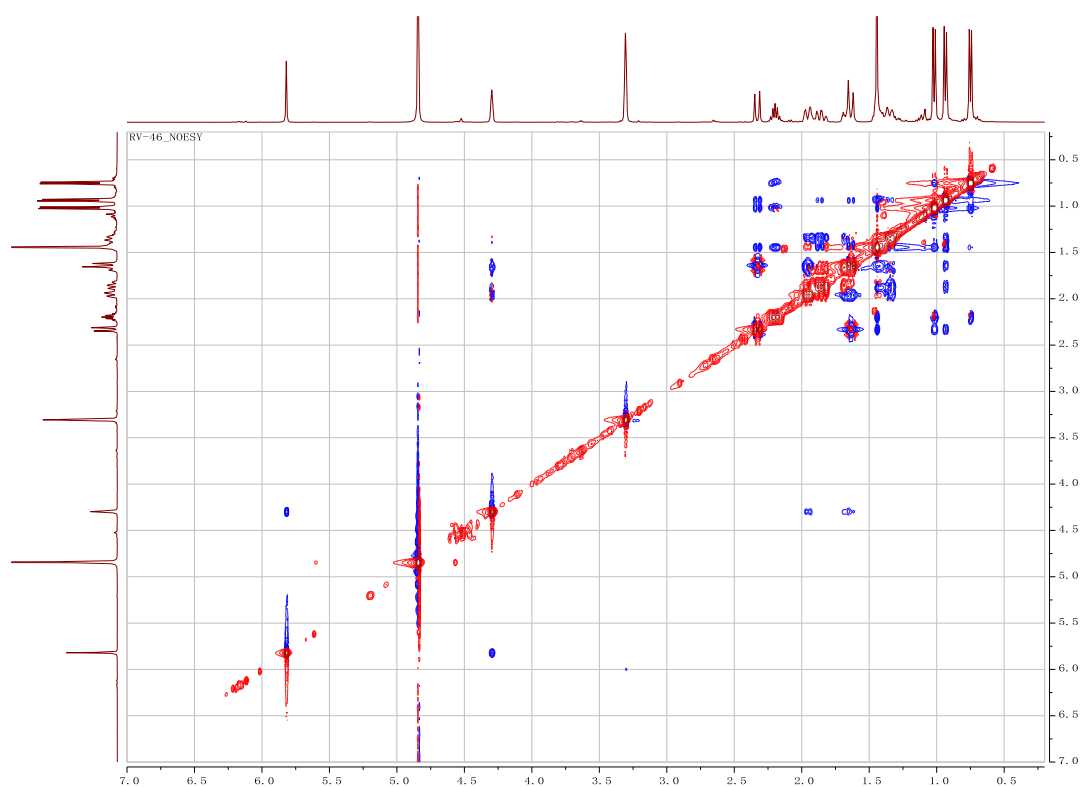

NOESY spectrum of **5**

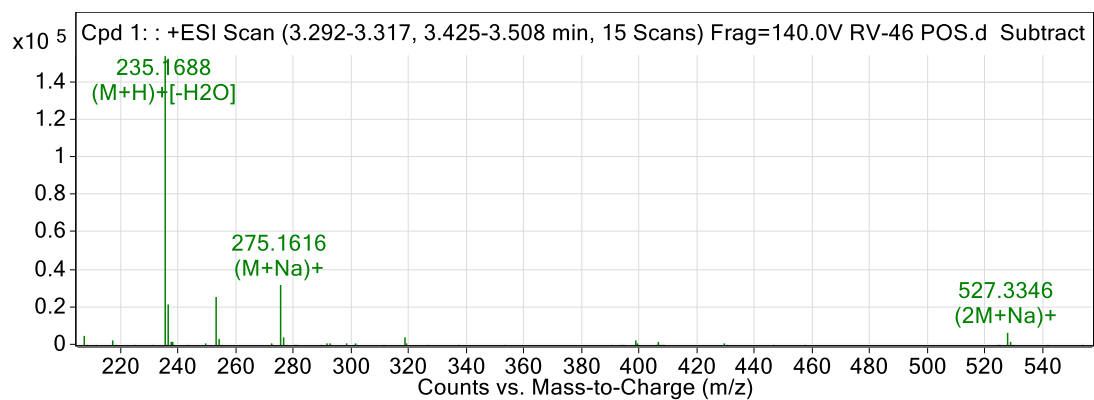

| <i>m/z</i> | <i>Calc m/z</i> | Diff(ppm) | <i>z</i> | Abund    | Formula                                          | Ion                                    |
|------------|-----------------|-----------|----------|----------|--------------------------------------------------|----------------------------------------|
| 235.1688   | 235.1693        | -2.02     | 1        | 153907.2 | C <sub>15</sub> H <sub>23</sub> O <sub>2</sub>   | (M+H) <sup>+</sup> [-H <sub>2</sub> O] |
| 253.1798   | 253.1798        | -0.08     | 1        | 25897.4  | C <sub>15</sub> H <sub>25</sub> O <sub>3</sub>   | (M+H) <sup>+</sup>                     |
| 275.1616   | 275.1618        | -0.76     | 1        | 32605.2  | C <sub>15</sub> H <sub>24</sub> NaO <sub>3</sub> | (M+Na) <sup>+</sup>                    |
| 527.3346   | 527.3343        | 0.47      | 1        | 7395.4   | C <sub>30</sub> H <sub>48</sub> NaO <sub>6</sub> | (2M+Na) <sup>+</sup>                   |

HRESIMS spectrum of **5**

RV-42

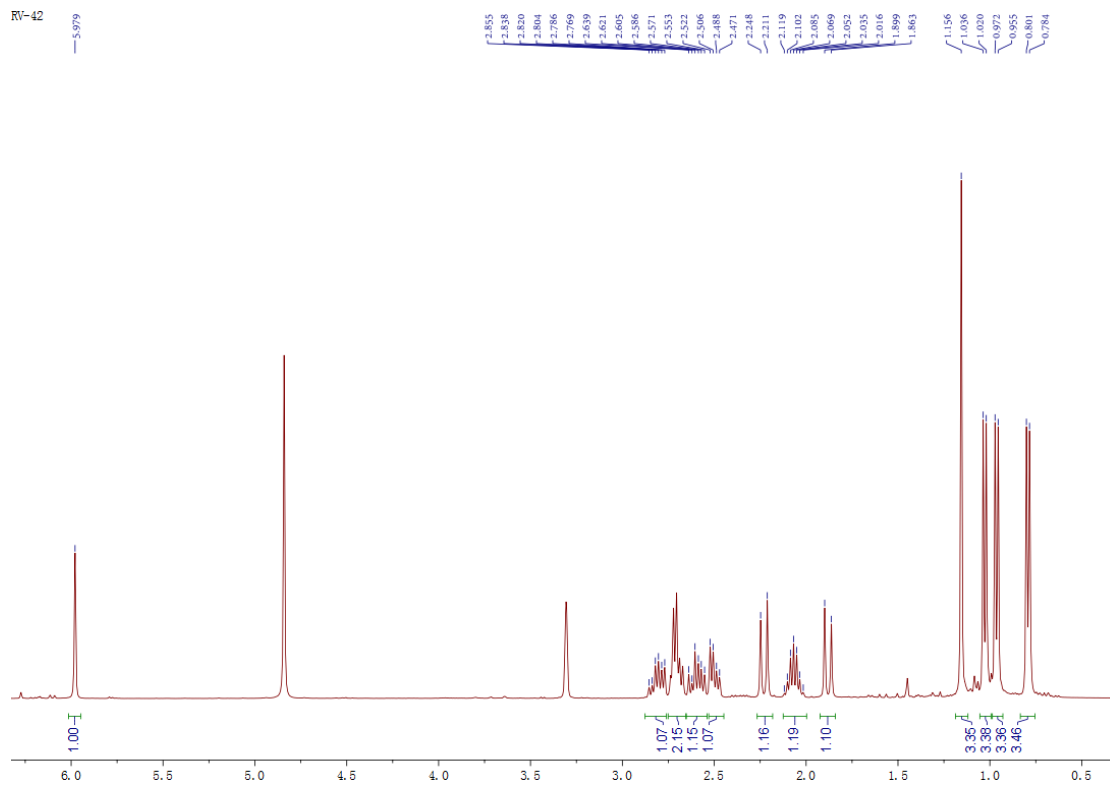<sup>1</sup>H NMR spectrum of **6**

RV-42\_13C

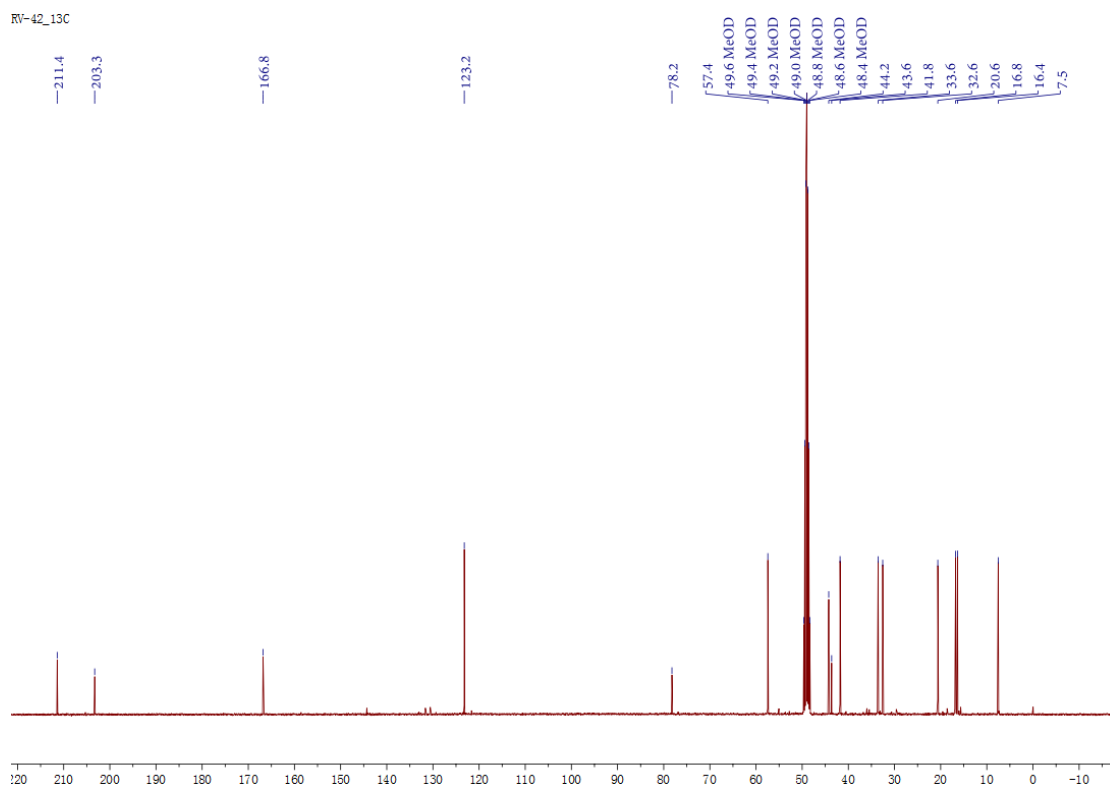<sup>13</sup>C NMR spectrum of **6**

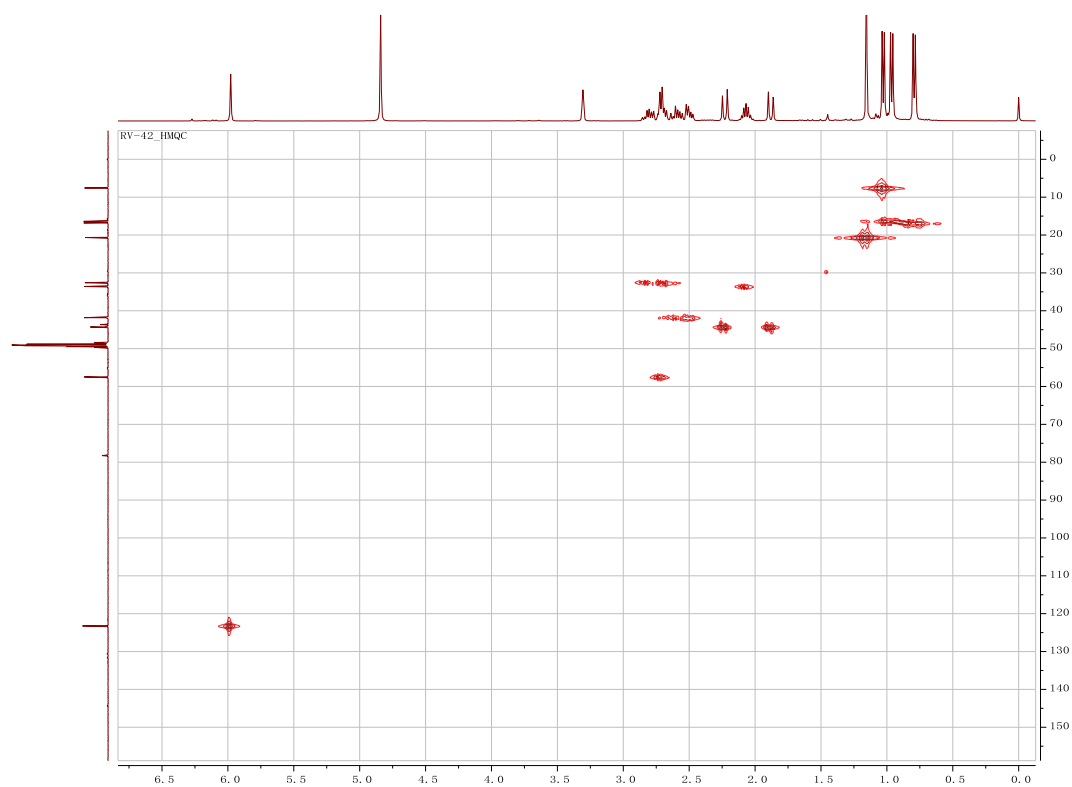

HMQC of **6**

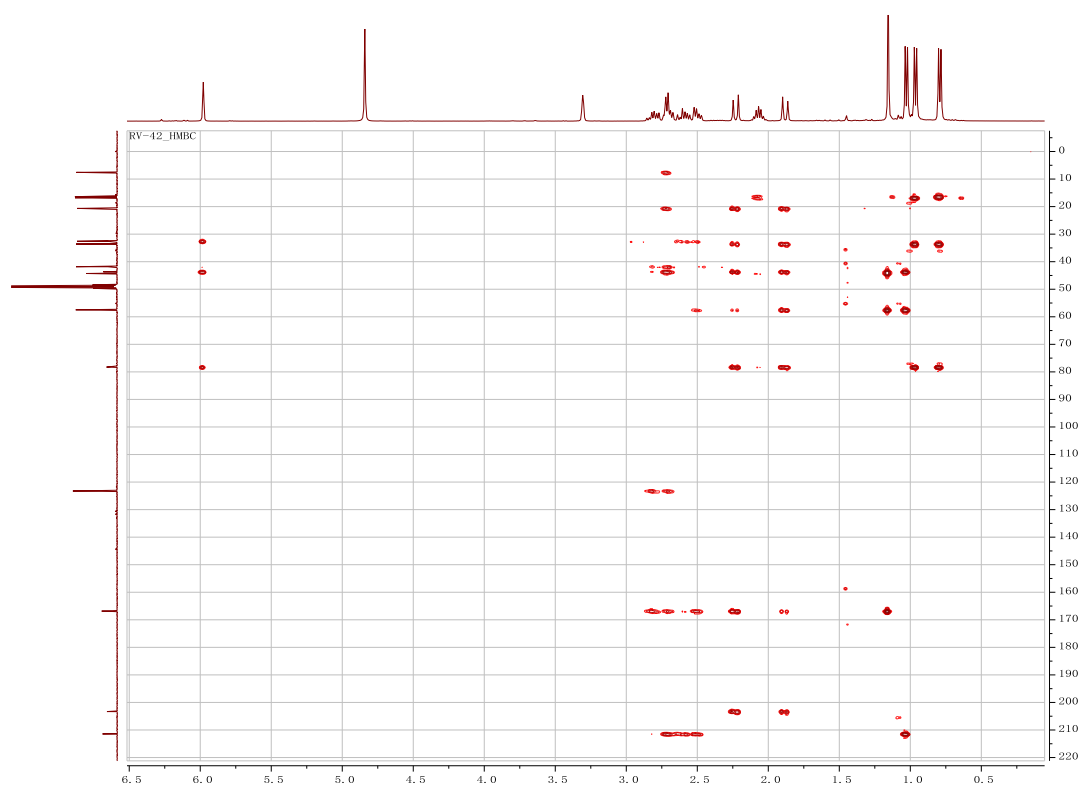

HMBC spectrum of **6**



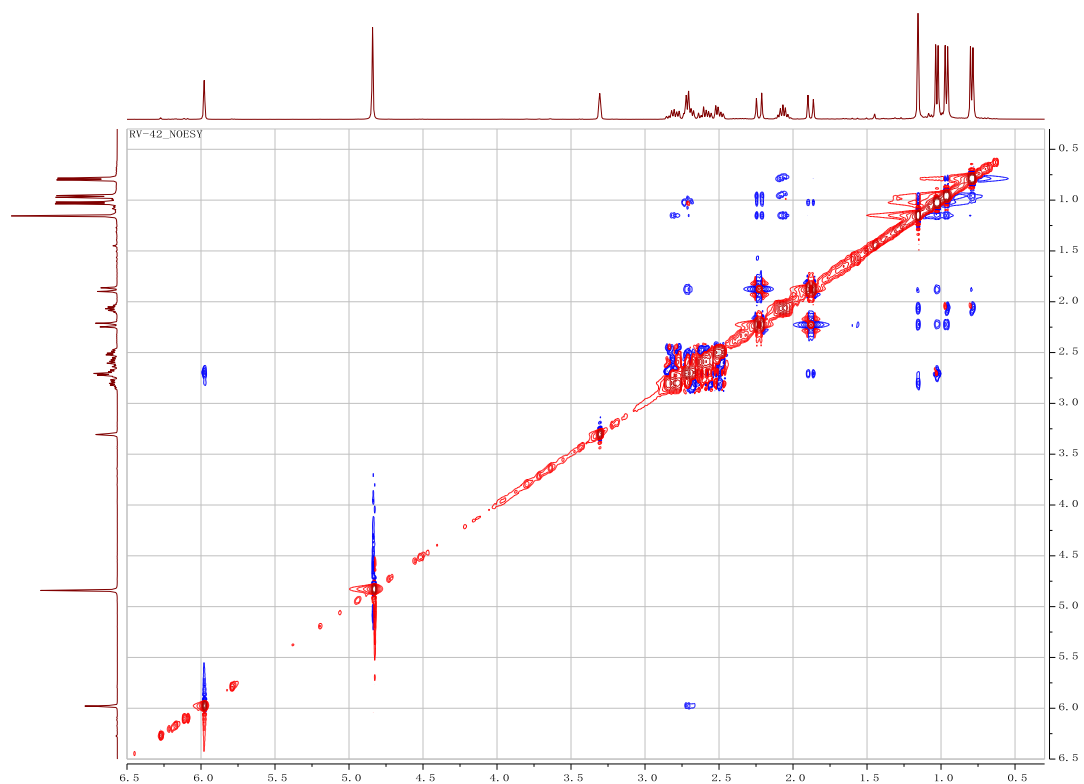

NOESY spectrum of **6**

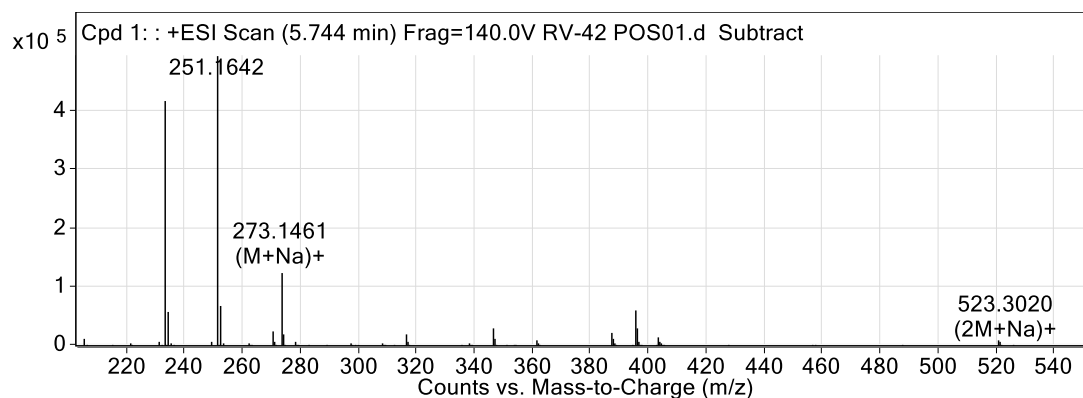

| <i>m/z</i> | <i>Calc m/z</i> | Diff(ppm) | <i>Z</i> | Abund    | Formula                                          | Ion                                    |
|------------|-----------------|-----------|----------|----------|--------------------------------------------------|----------------------------------------|
| 233.1535   | 233.1536        | -0.58     | 1        | 419769.5 | C <sub>15</sub> H <sub>21</sub> O <sub>2</sub>   | (M+H) <sup>+</sup> [-H <sub>2</sub> O] |
| 251.1642   | 251.1642        | 0.06      |          | 495166.2 | C <sub>15</sub> H <sub>23</sub> O <sub>3</sub>   | (M+H) <sup>+</sup>                     |
| 273.1461   | 273.1461        | -0.19     | 1        | 125710.6 | C <sub>15</sub> H <sub>22</sub> NaO <sub>3</sub> | (M+Na) <sup>+</sup>                    |
| 523.3020   | 523.3030        | -1.94     | 1        | 695.4    | C <sub>30</sub> H <sub>44</sub> NaO <sub>6</sub> | (2M+Na) <sup>+</sup>                   |

HRESIMS spectrum of **6**

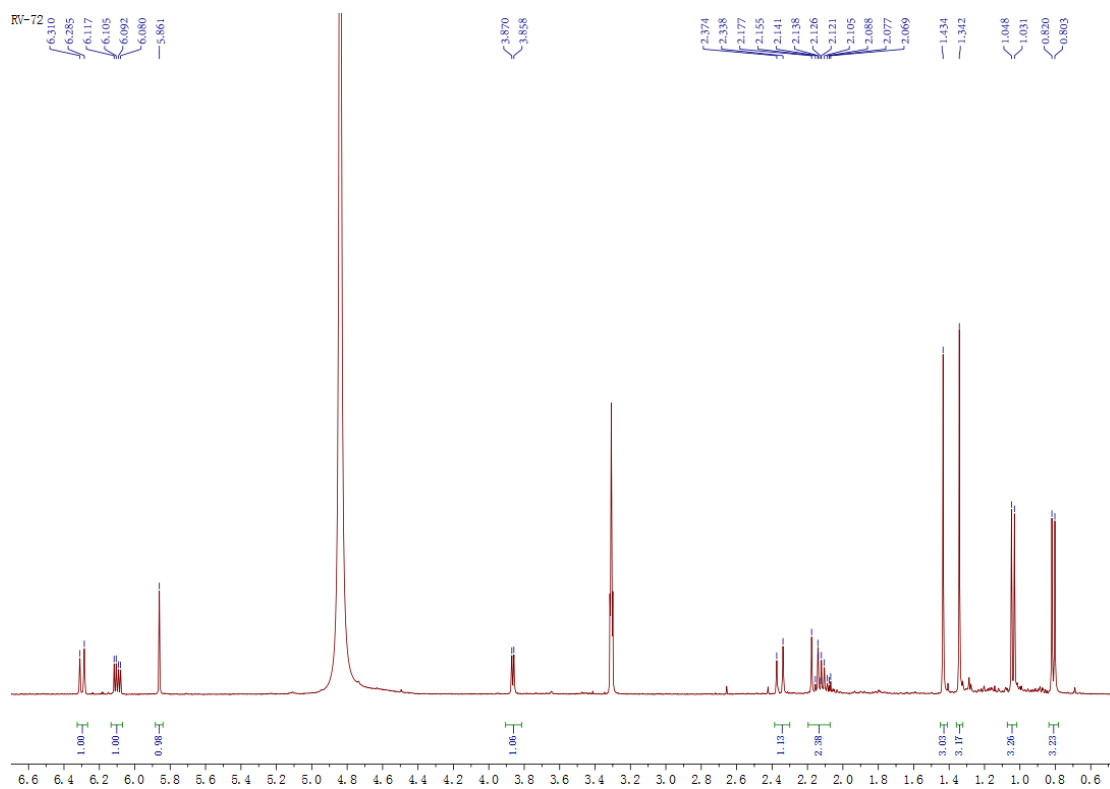

$^1\text{H}$  NMR spectrum of **7**

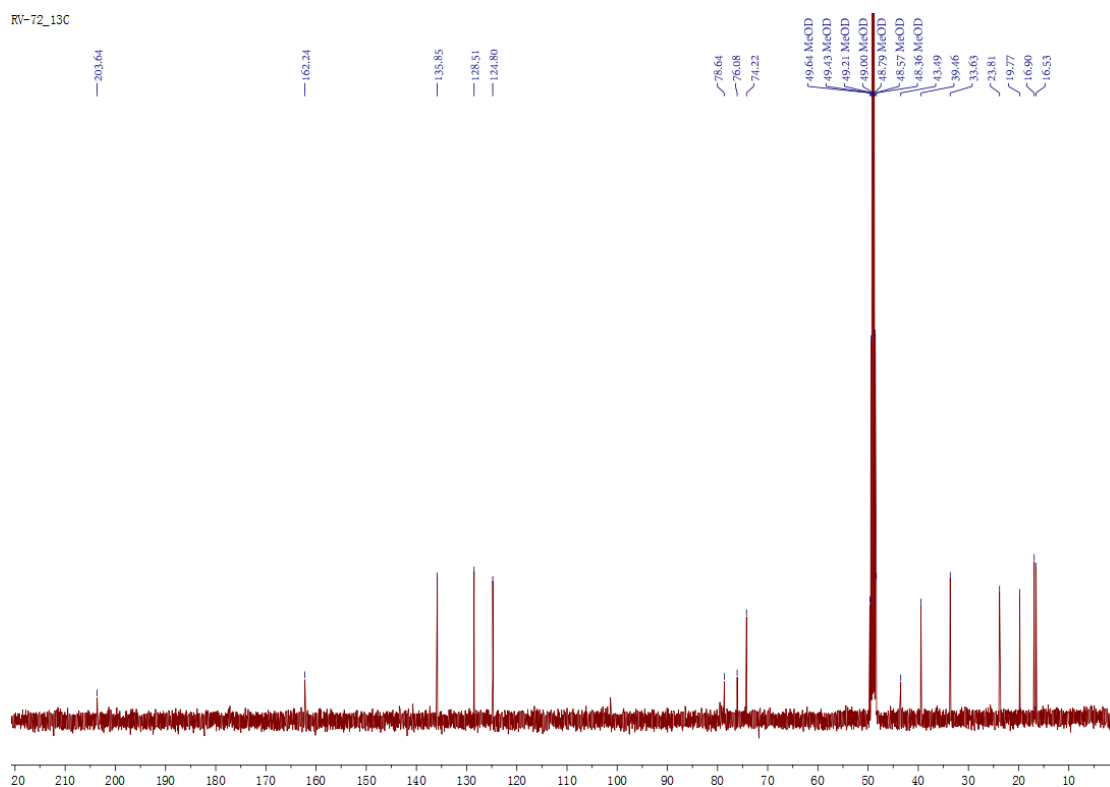

$^{13}\text{C}$  NMR spectrum of **7**

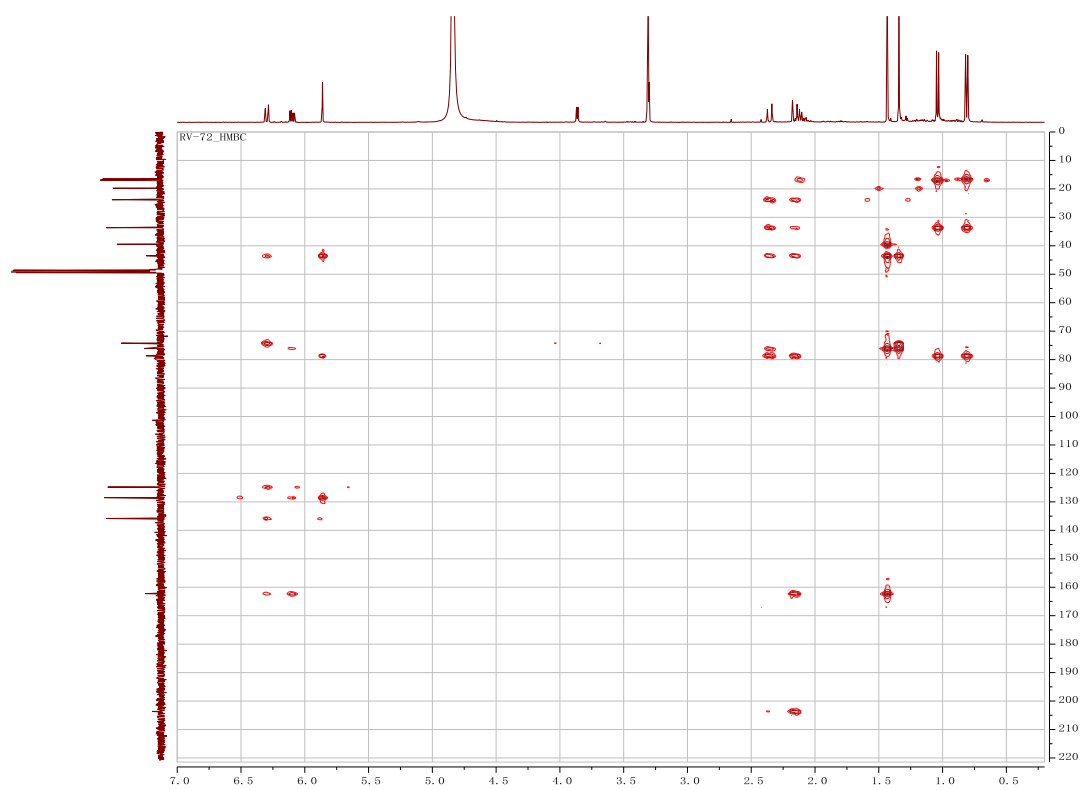

HMBC spectrum of **7**

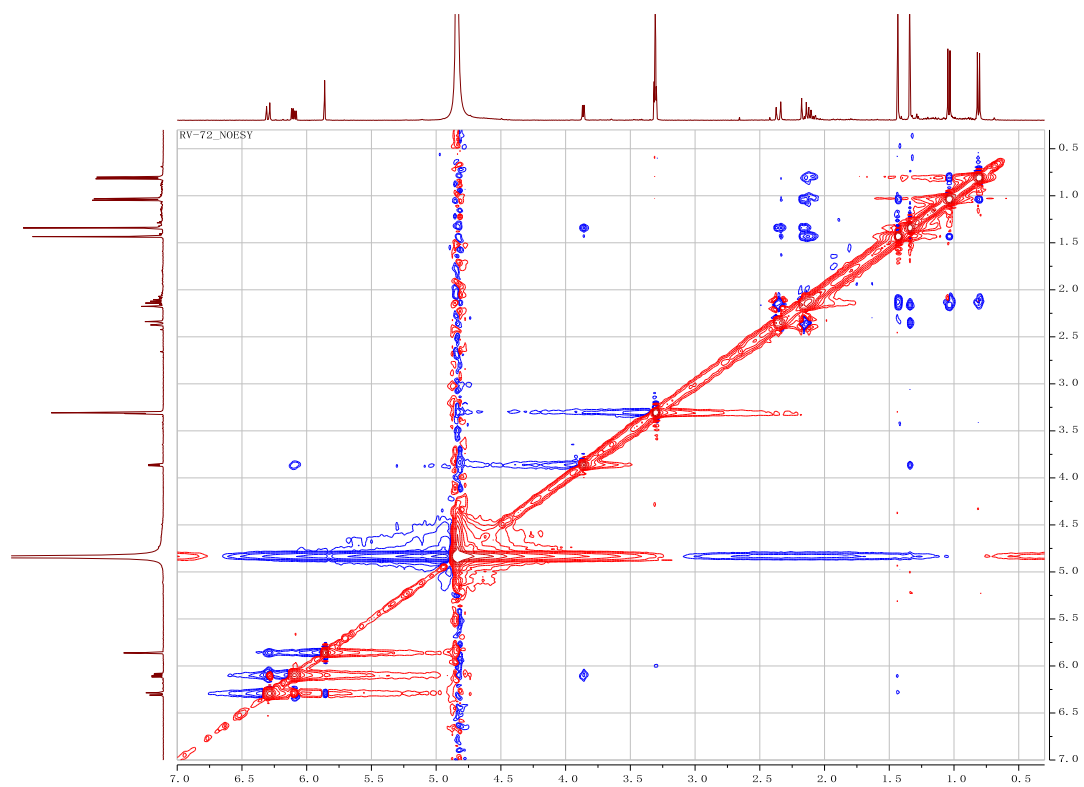

NOESY spectrum of **7**

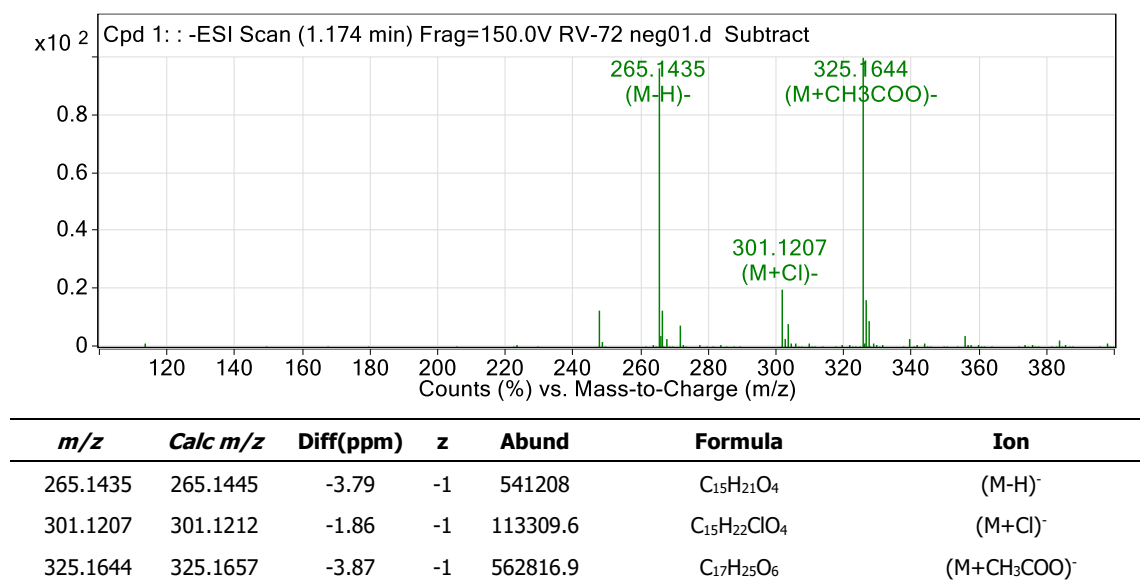

### HRESIMS spectrum of **7**

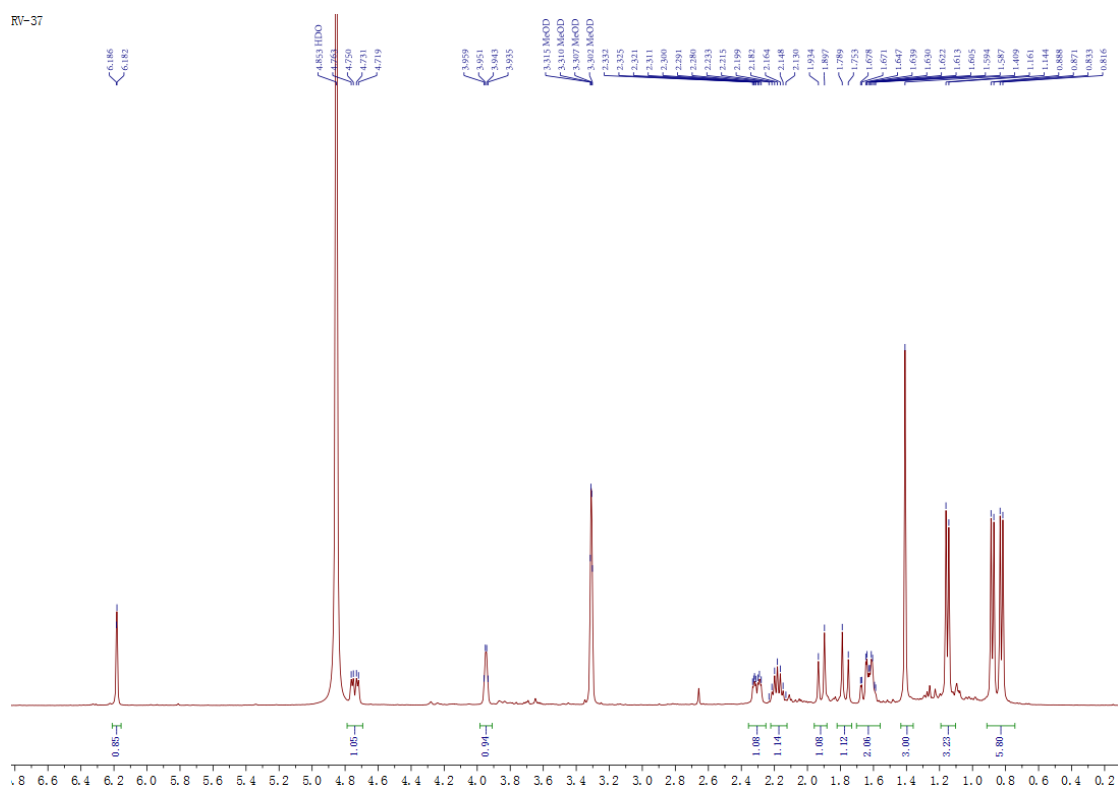

### <sup>1</sup>H NMR spectrum of **8**

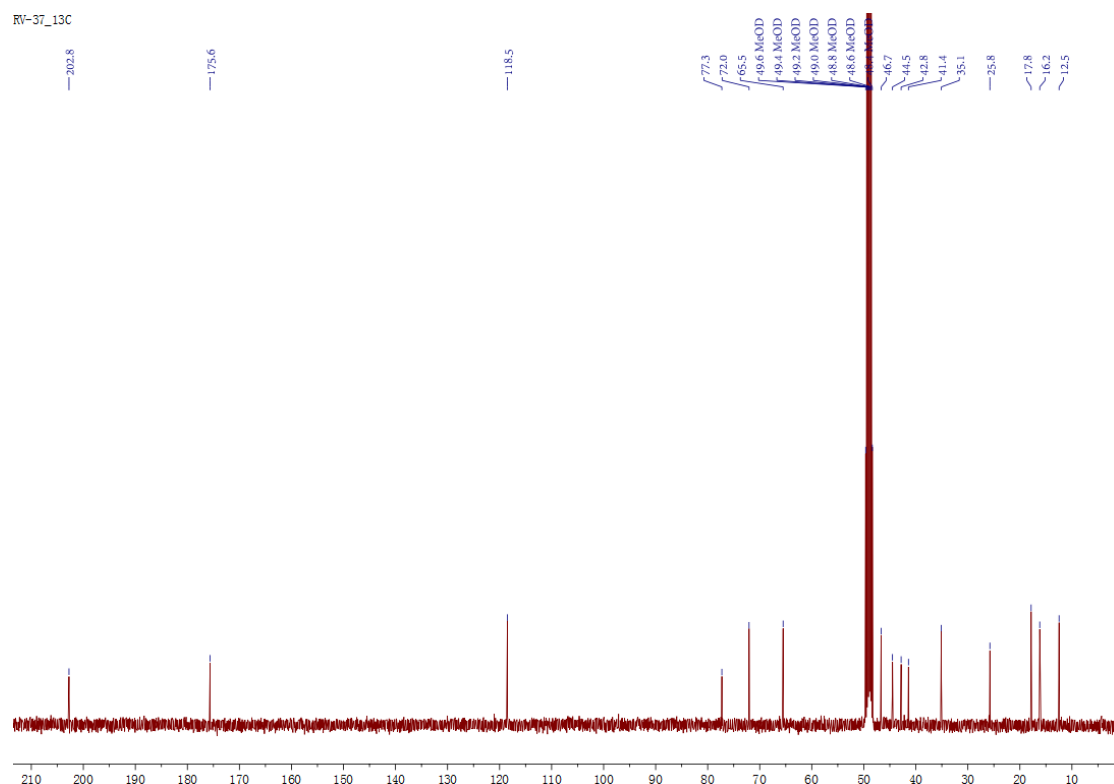

$^{13}\text{C}$  NMR spectrum of **8**

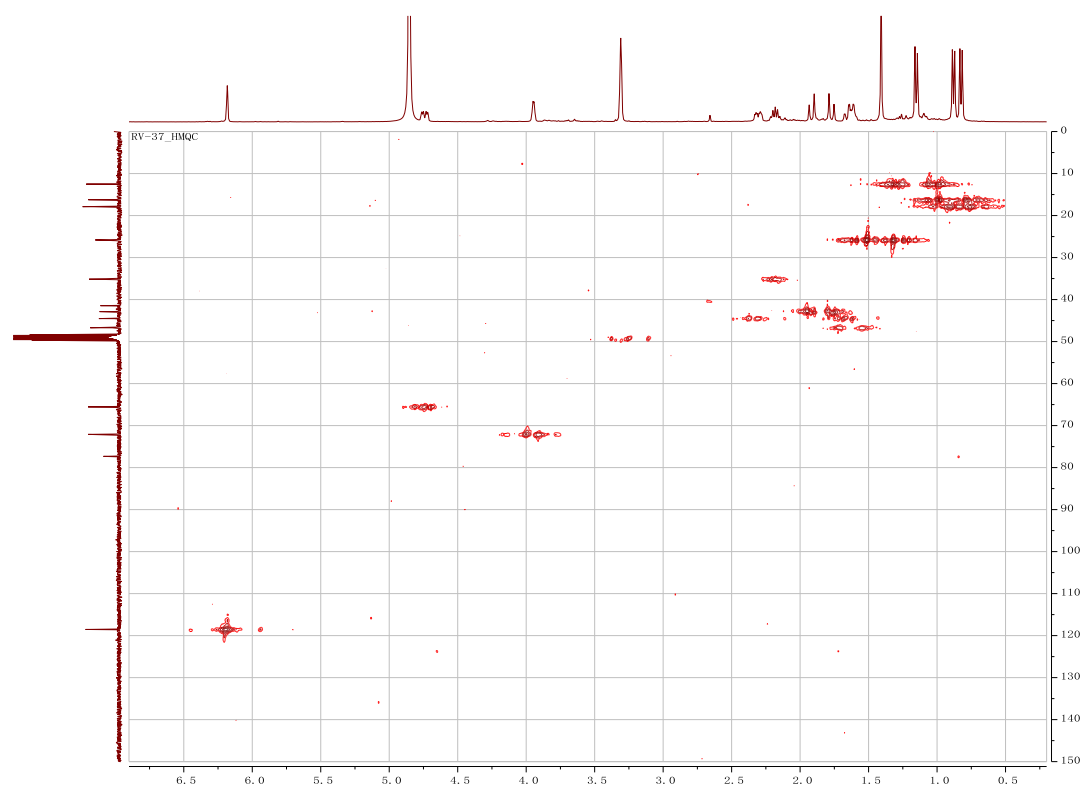

HMQC spectrum of **8**

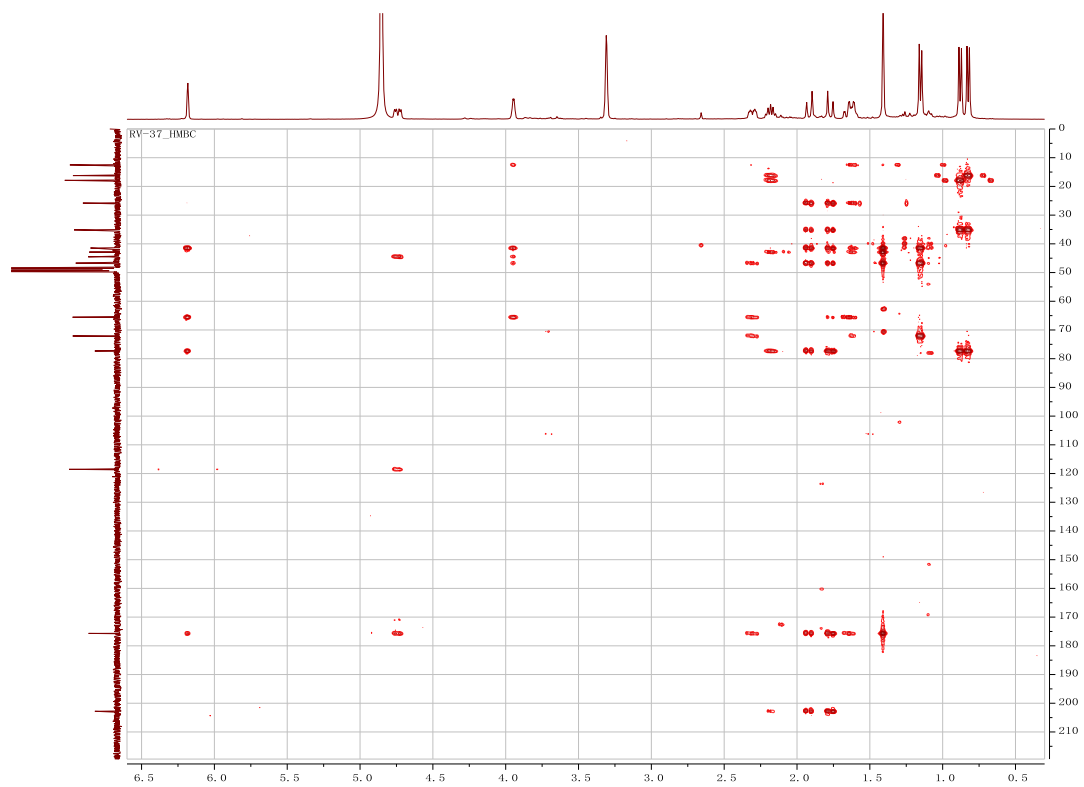

HMBC spectrum of **8**

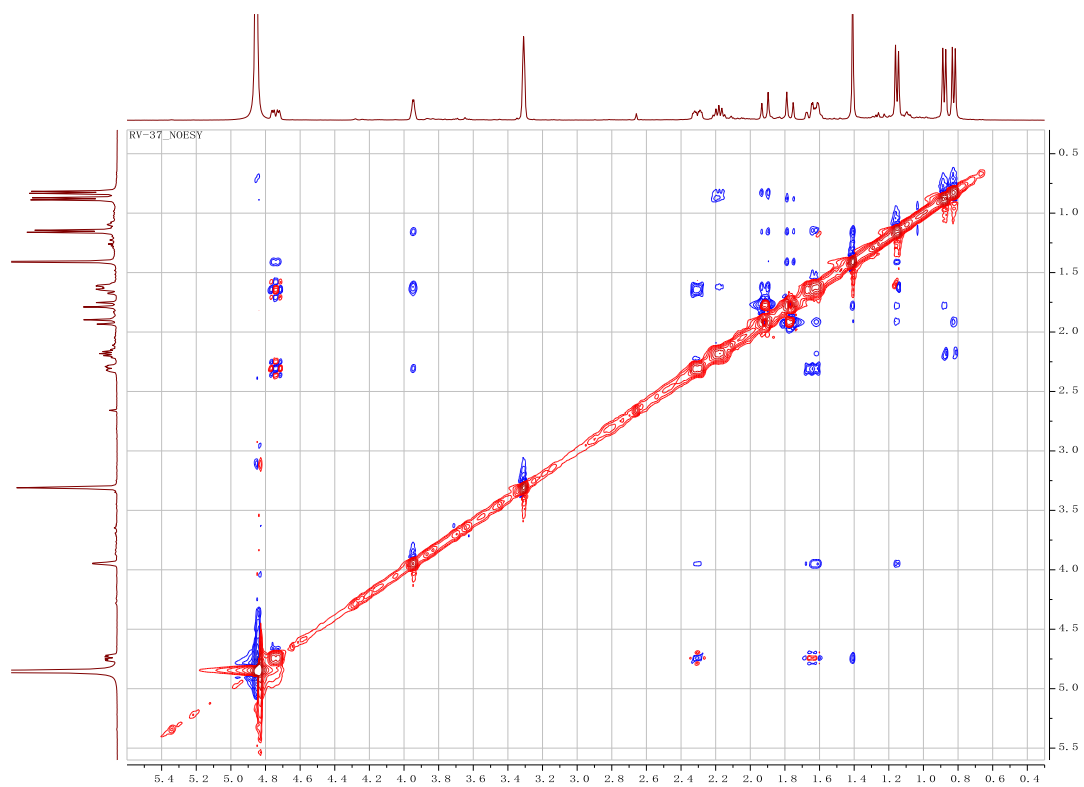

NOESY spectrum of **8**

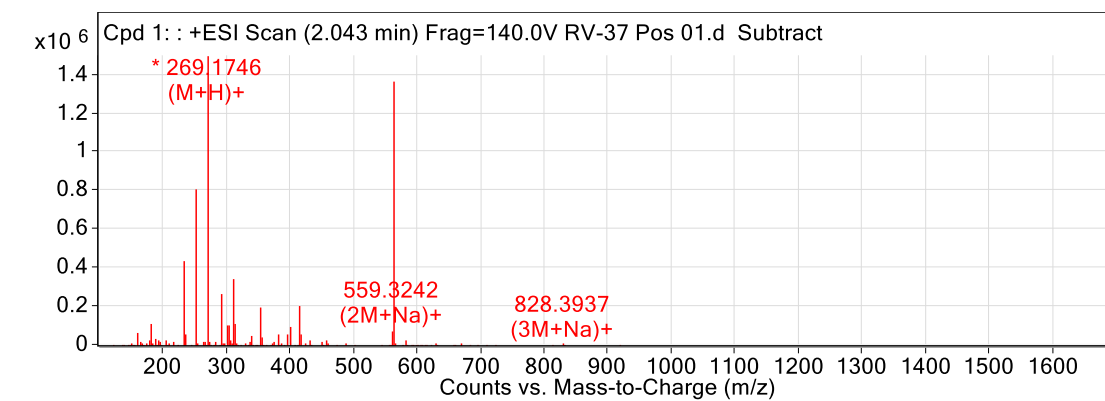

| <i>m/z</i> | <i>Calc m/z</i> | Diff(ppm) | <i>z</i> | Abund    | Formula                                          | Ion                  |
|------------|-----------------|-----------|----------|----------|--------------------------------------------------|----------------------|
| 269.1746   | 269.1747        | -0.57     |          | 1497296  | C <sub>15</sub> H <sub>25</sub> O <sub>4</sub>   | (M+H) <sup>+</sup>   |
| 291.1563   | 291.1567        | -1.24     | 1        | 269051.4 | C <sub>15</sub> H <sub>24</sub> NaO <sub>4</sub> | (M+Na) <sup>+</sup>  |
| 559.3242   | 559.3241        | 0.07      | 1        | 74474.2  | C <sub>30</sub> H <sub>48</sub> NaO <sub>8</sub> | (2M+Na) <sup>+</sup> |

### HRESIMS spectrum of **8**

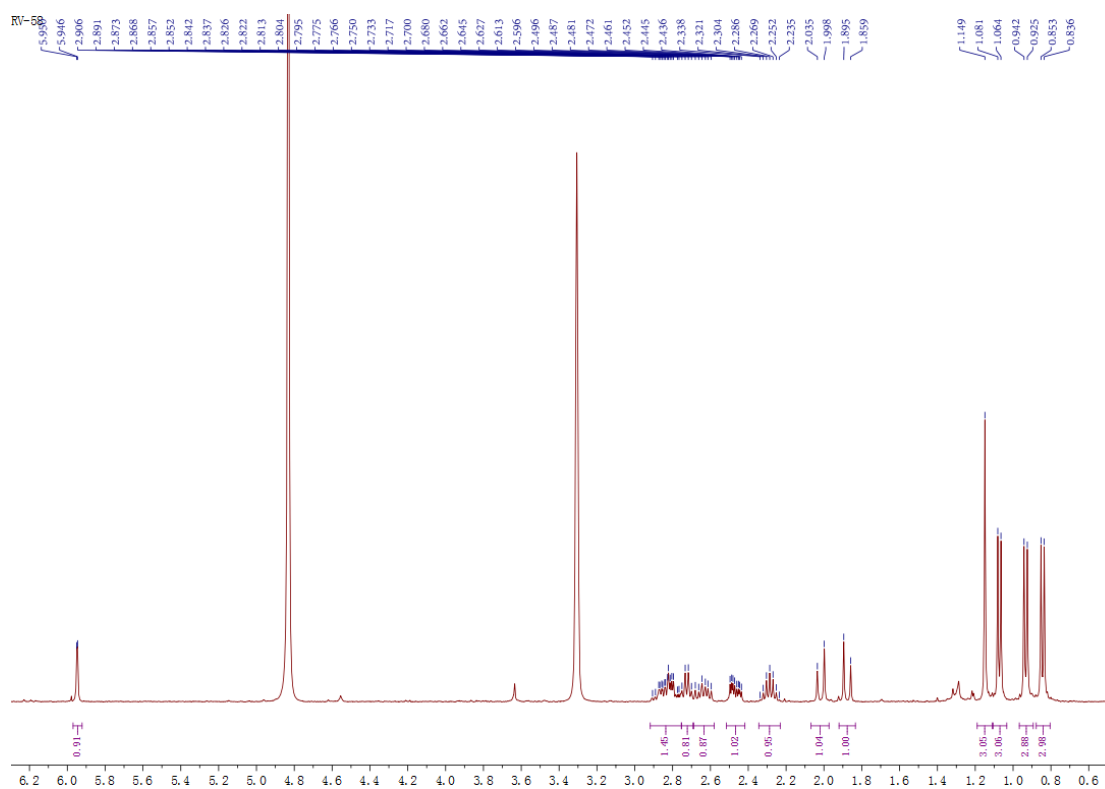

### <sup>1</sup>H NMR spectrum of **9**

RV-58\_13C

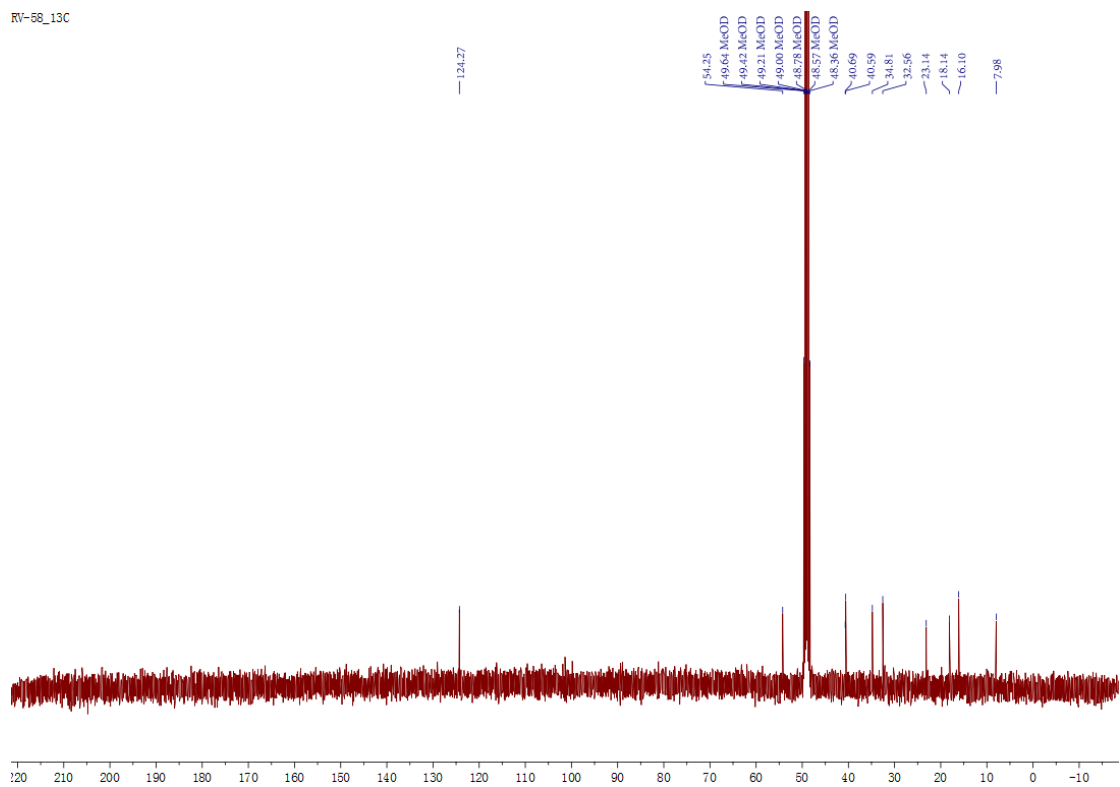

$^{13}\text{C}$  NMR spectrum of **9**

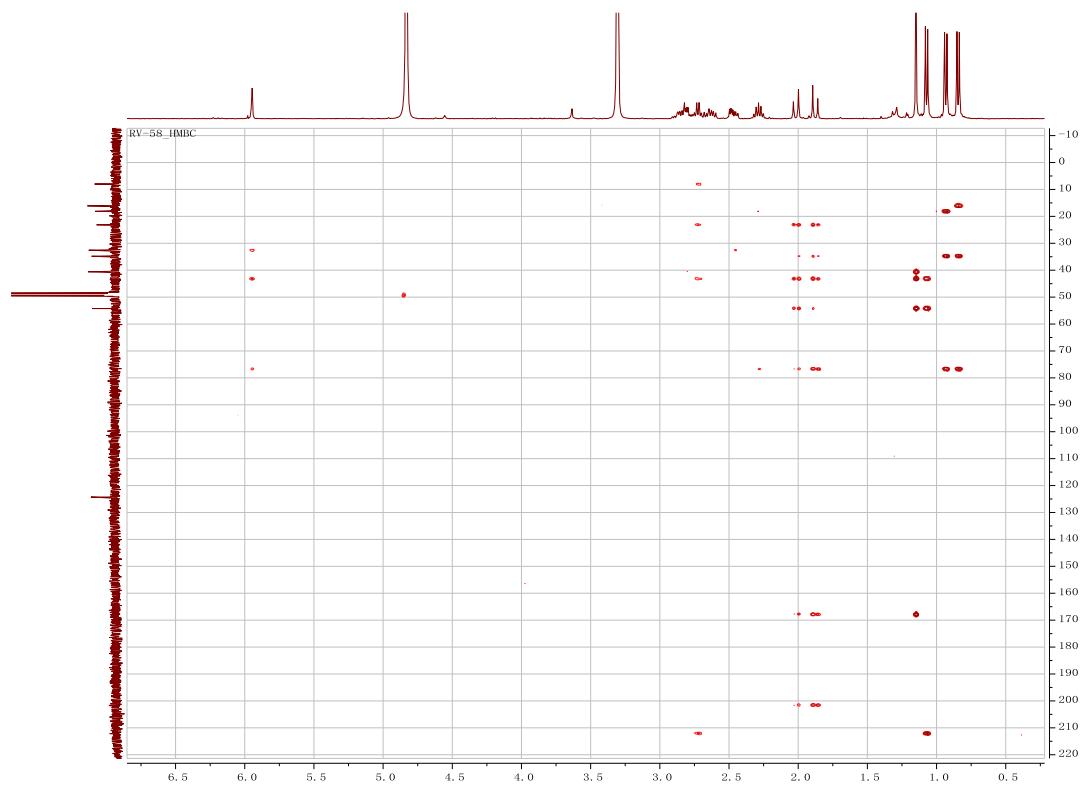

HMBC spectrum of **9**



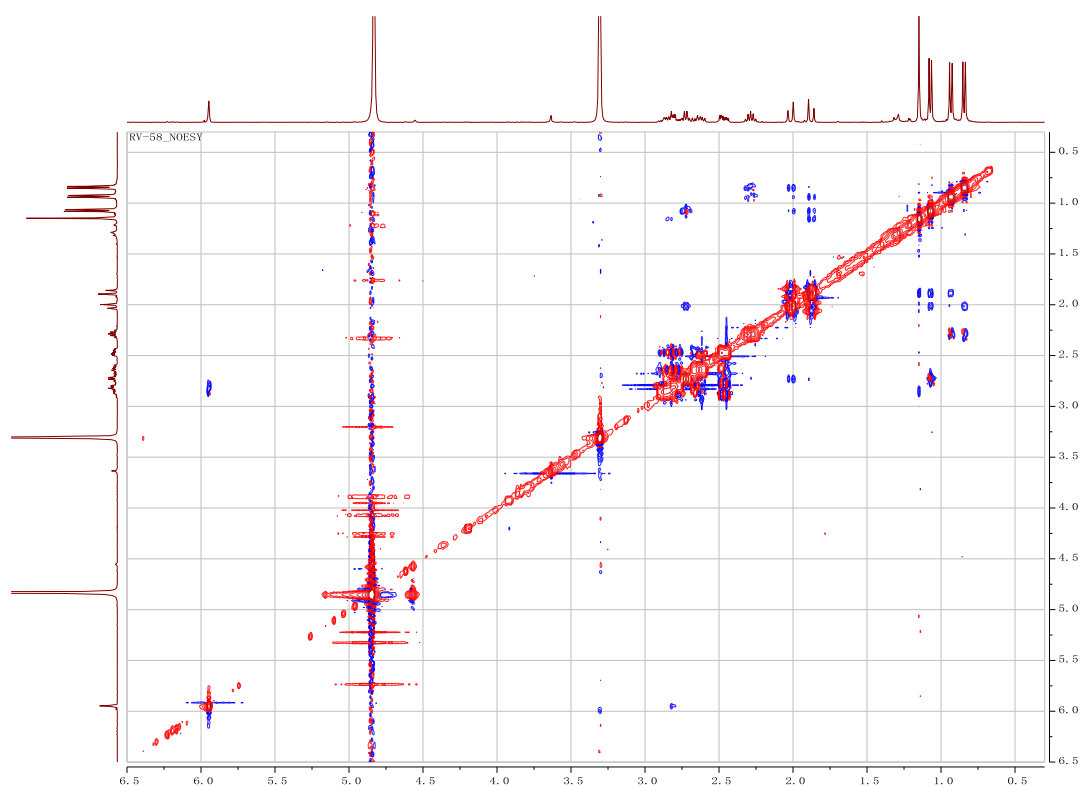

NOESY spectrum of **9**

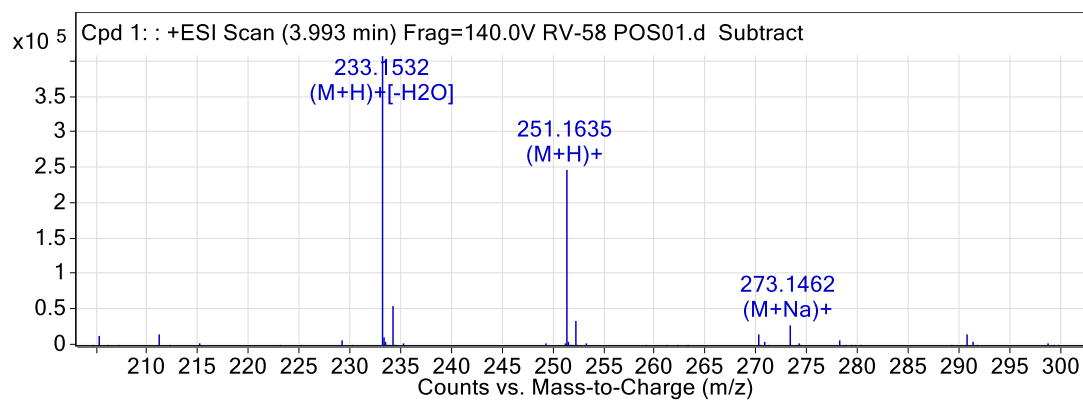

| <i>m/z</i> | <i>Calc m/z</i> | Diff(ppm) | <i>z</i> | Abund    | Formula                                          | Ion                                    |
|------------|-----------------|-----------|----------|----------|--------------------------------------------------|----------------------------------------|
| 233.1532   | 233.1536        | -1.89     | 1        | 408255.1 | C <sub>15</sub> H <sub>21</sub> O <sub>2</sub>   | (M+H) <sup>+</sup> [-H <sub>2</sub> O] |
| 251.1635   | 251.1642        | -2.65     | 1        | 247640.1 | C <sub>15</sub> H <sub>23</sub> O <sub>3</sub>   | (M+H) <sup>+</sup>                     |
| 273.1462   | 273.1461        | 0.25      | 1        | 28448.9  | C <sub>15</sub> H <sub>22</sub> NaO <sub>3</sub> | (M+Na) <sup>+</sup>                    |

HRESIMS spectrum of **9**

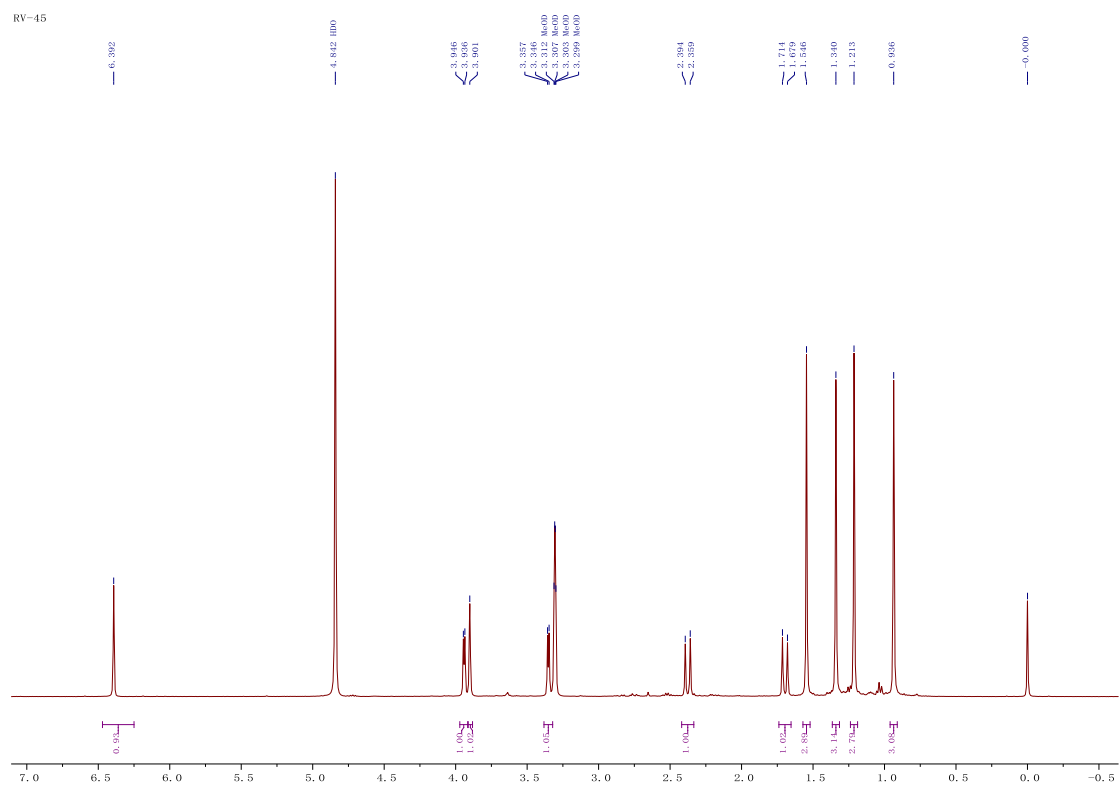

<sup>1</sup>H NMR spectrum of **10**

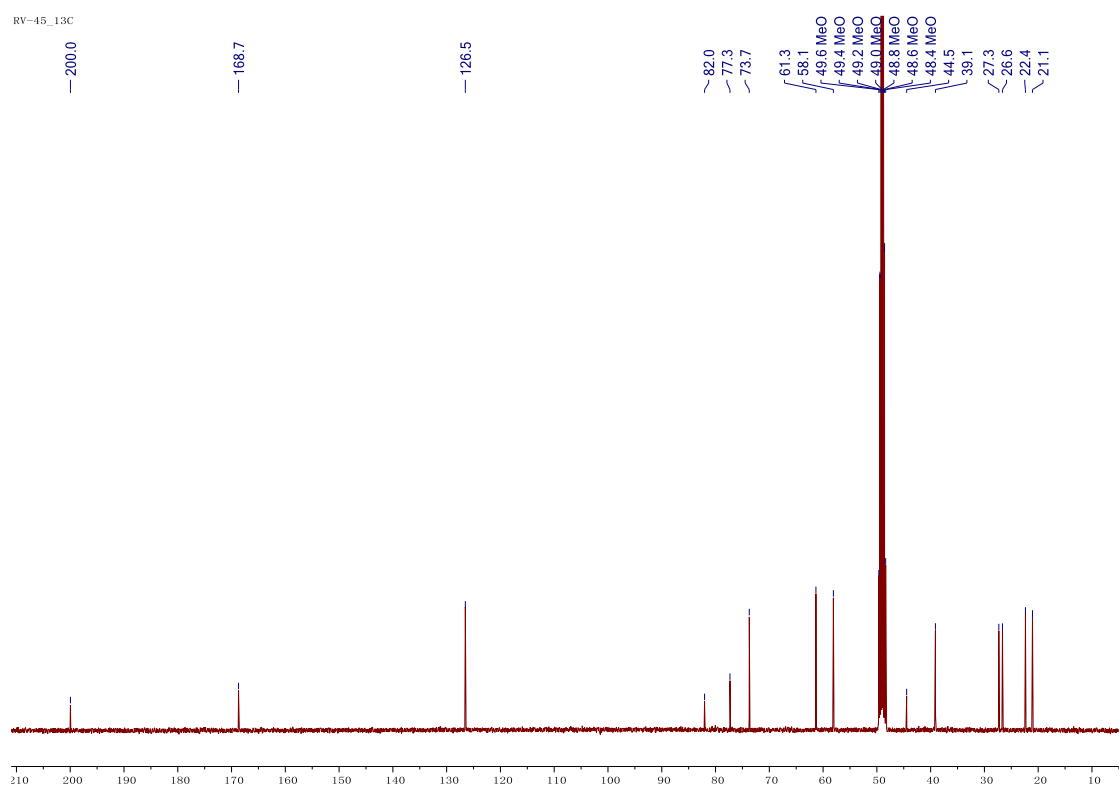

<sup>13</sup>C NMR spectrum of **10**

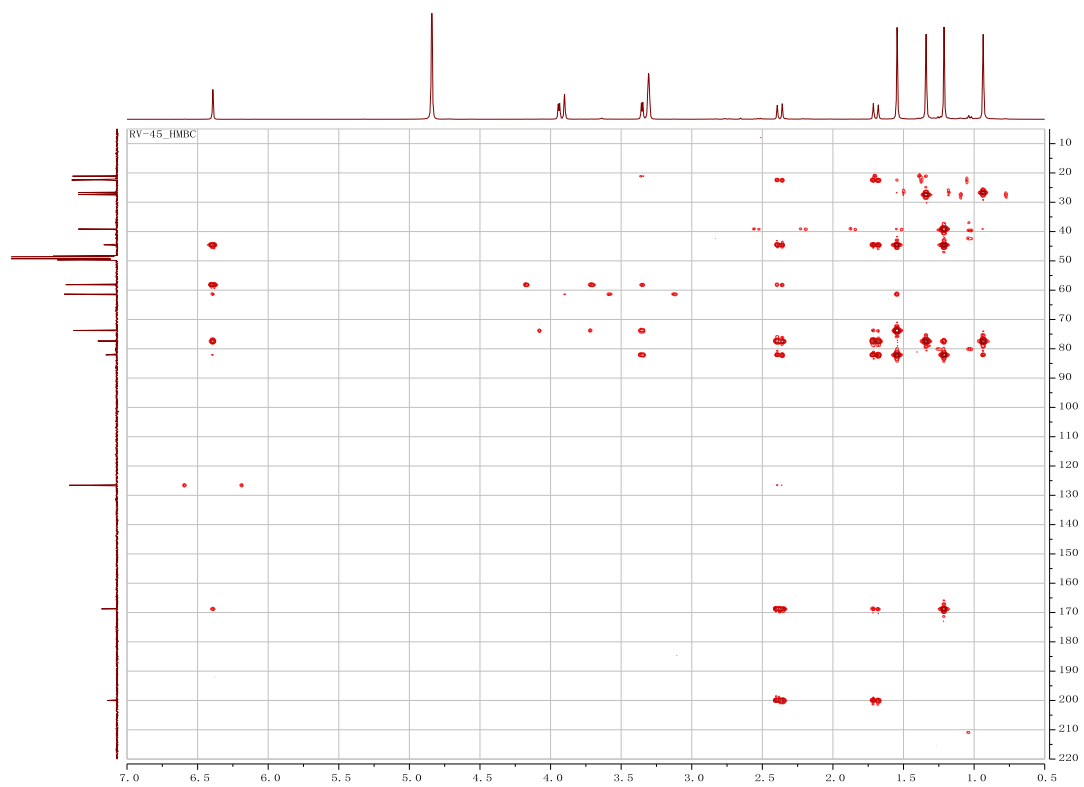

HMBC spectrum of **10**

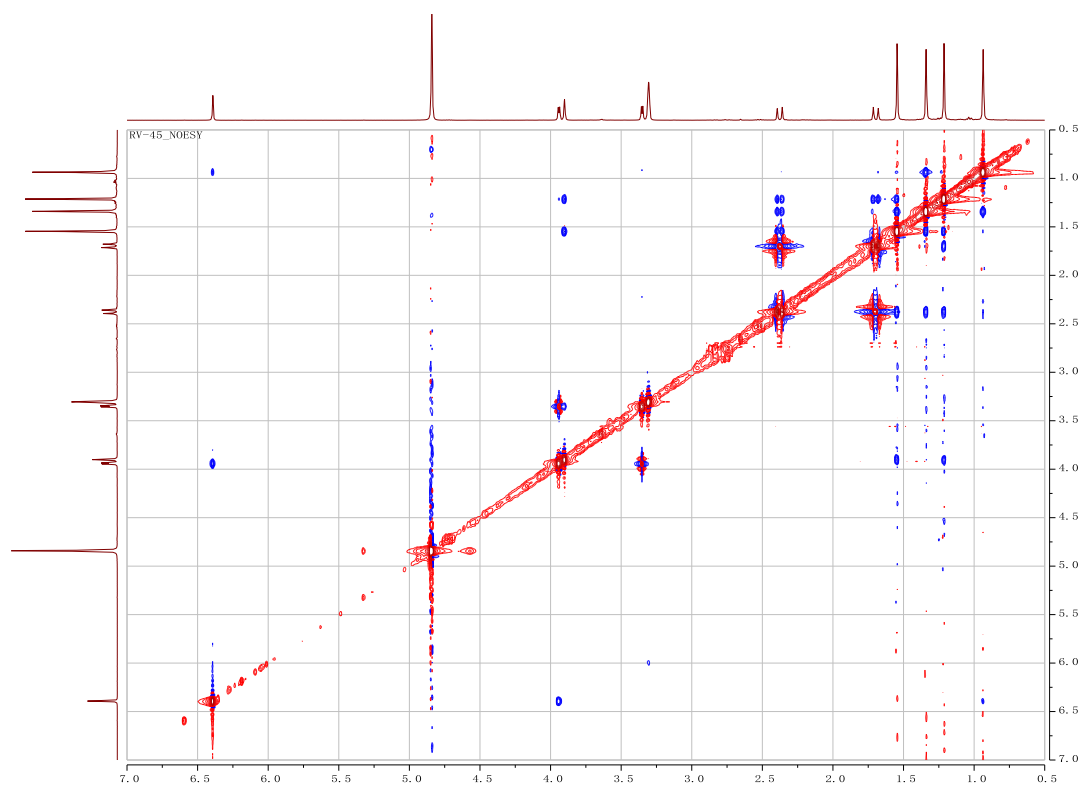

NOESY spectrum of **10**

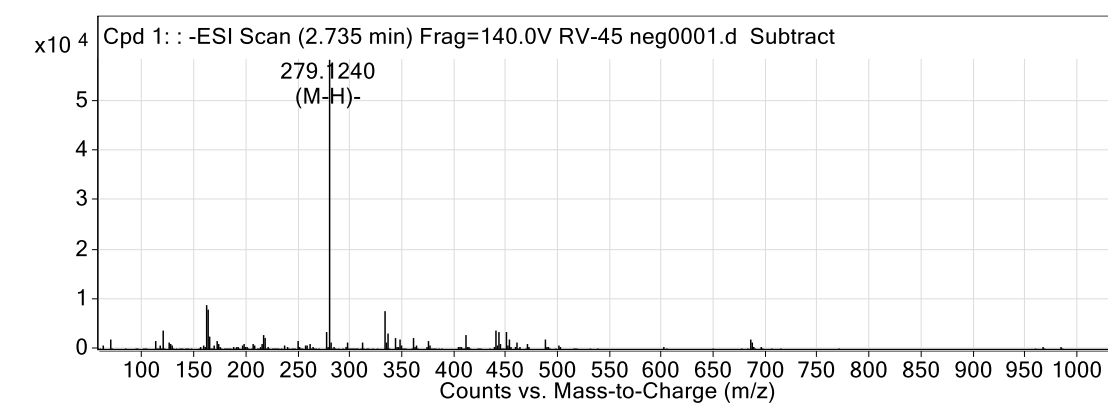

| <i>m/z</i> | <i>Calc m/z</i> | Diff(ppm) | <i>z</i> | Abund | Formula                                        | Ion                |
|------------|-----------------|-----------|----------|-------|------------------------------------------------|--------------------|
| 279.124    | 279.1238        | 0.72      | -1       | 58422 | C <sub>15</sub> H <sub>19</sub> O <sub>5</sub> | (M-H) <sup>-</sup> |

HRESIMS spectrum of **10**

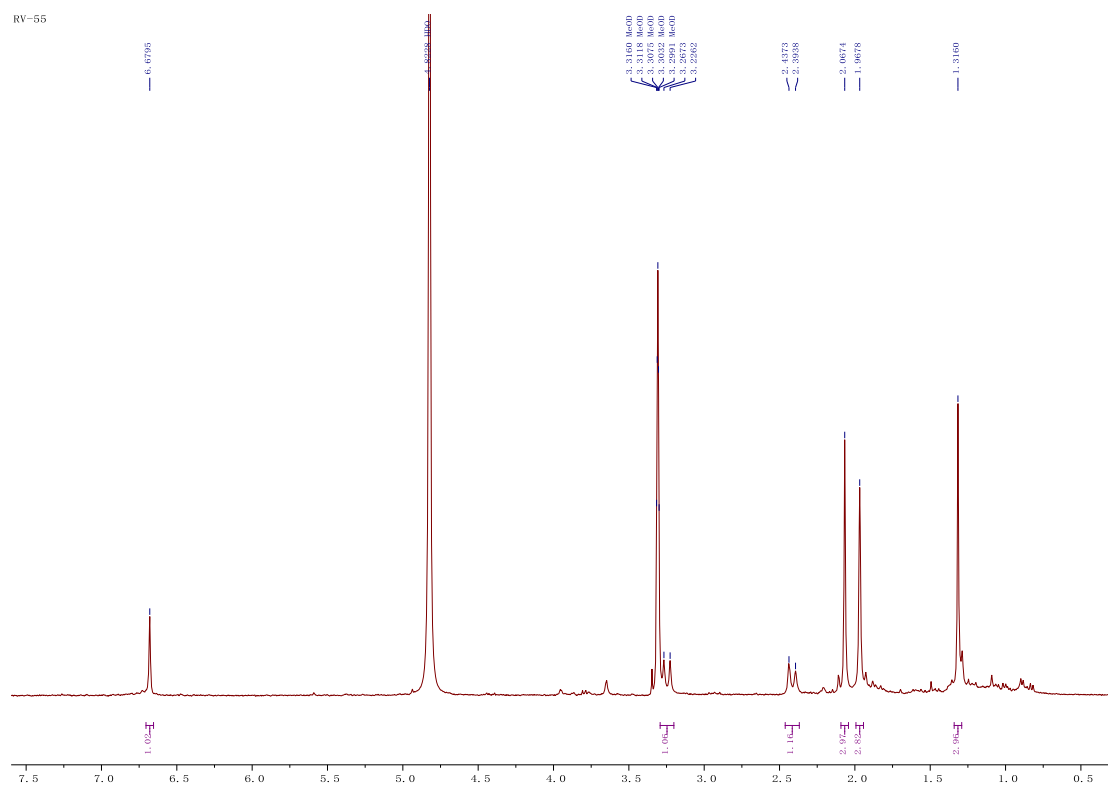

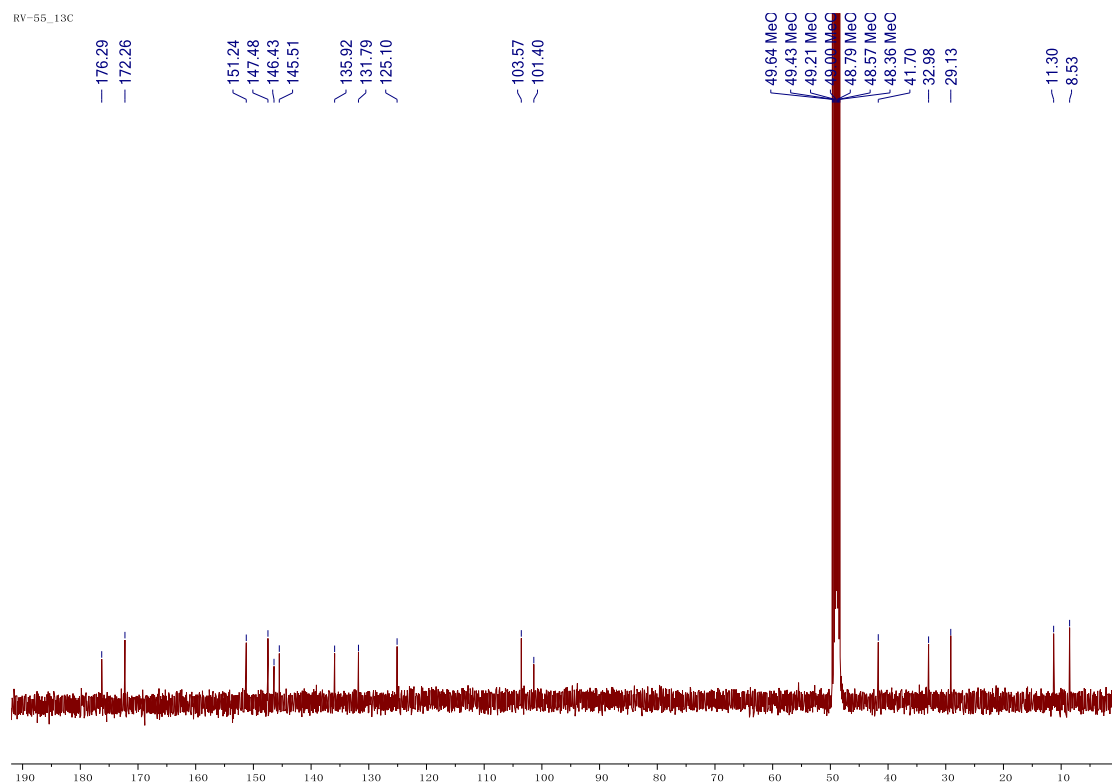

$^{13}\text{C}$  NMR spectrum of **11**

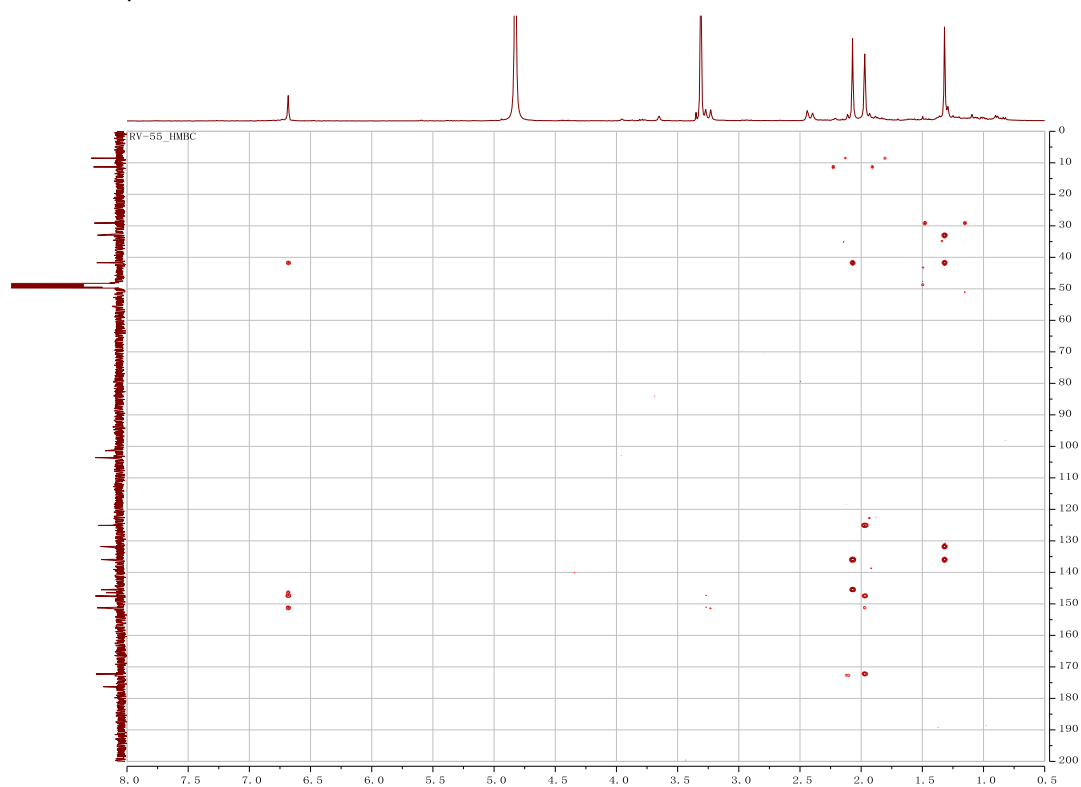

HMBC spectrum of **11**

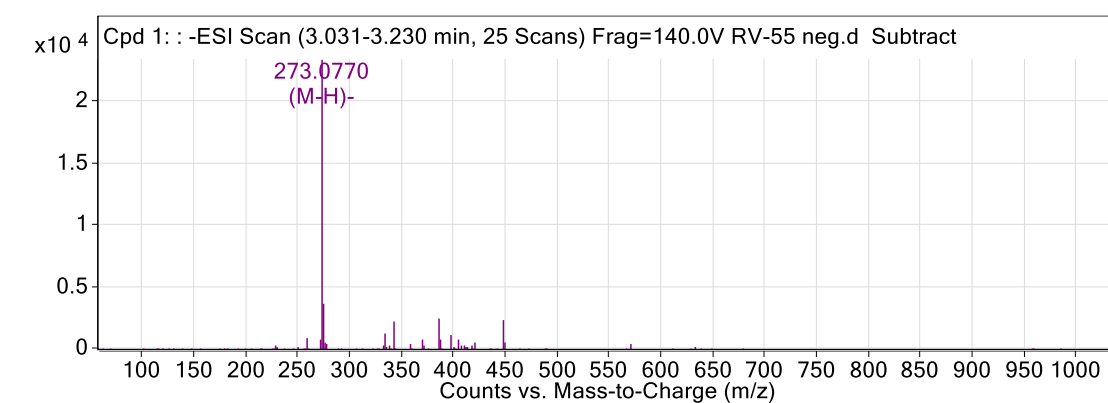

| <i>m/z</i> | <i>Calc m/z</i> | Diff(ppm) | <i>z</i> | Abund | Formula                                        | Ion                |
|------------|-----------------|-----------|----------|-------|------------------------------------------------|--------------------|
| 273.0770   | 273.0768        | 0.43      | -1       | 23393 | C <sub>15</sub> H <sub>13</sub> O <sub>5</sub> | (M-H) <sup>-</sup> |

### HRESIMS spectrum of **11**

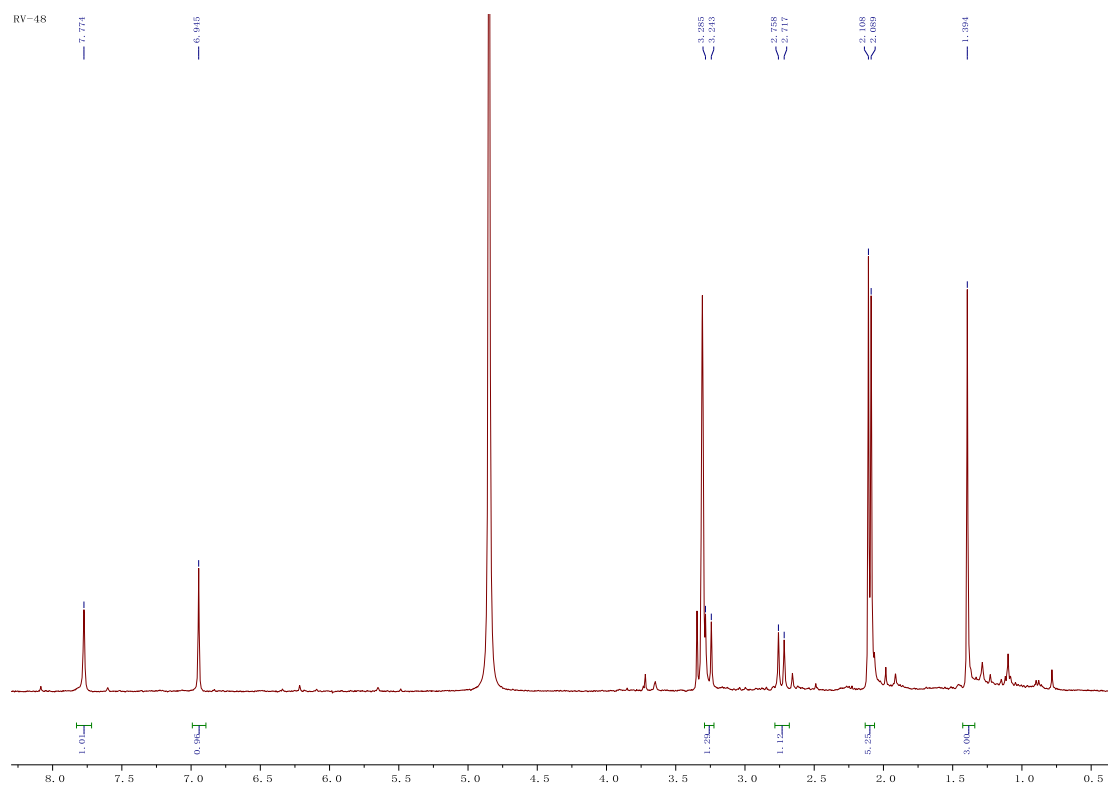

### <sup>1</sup>H NMR spectrum of **12**

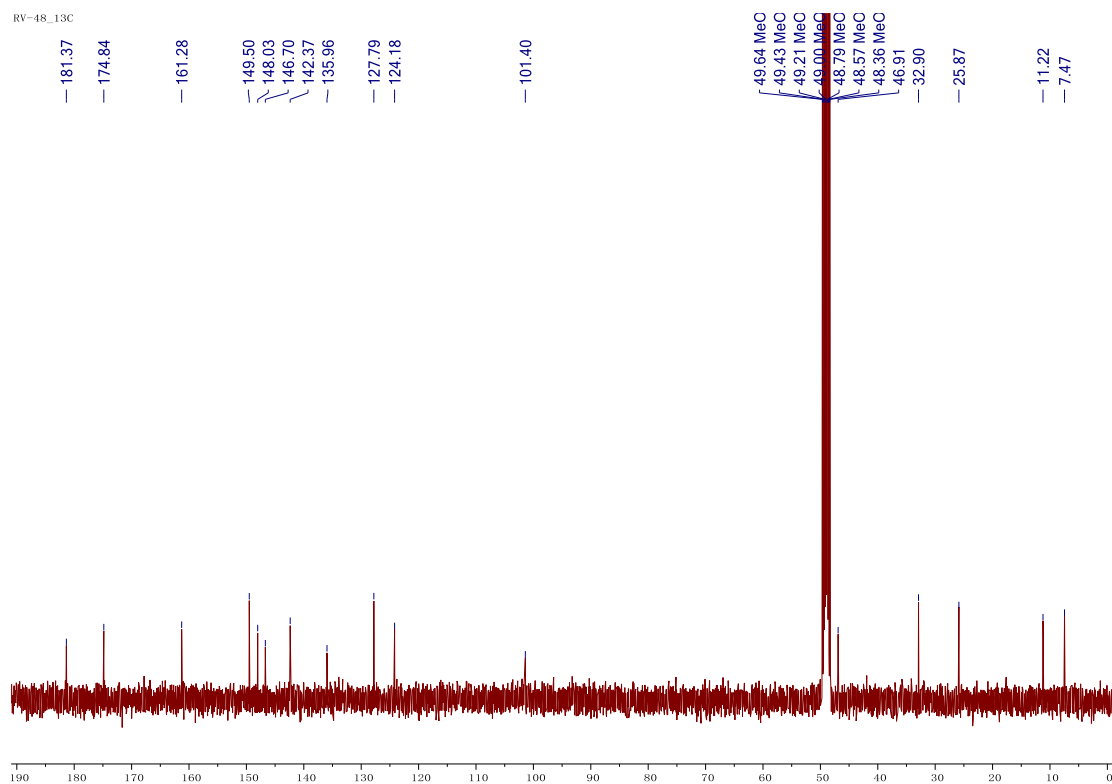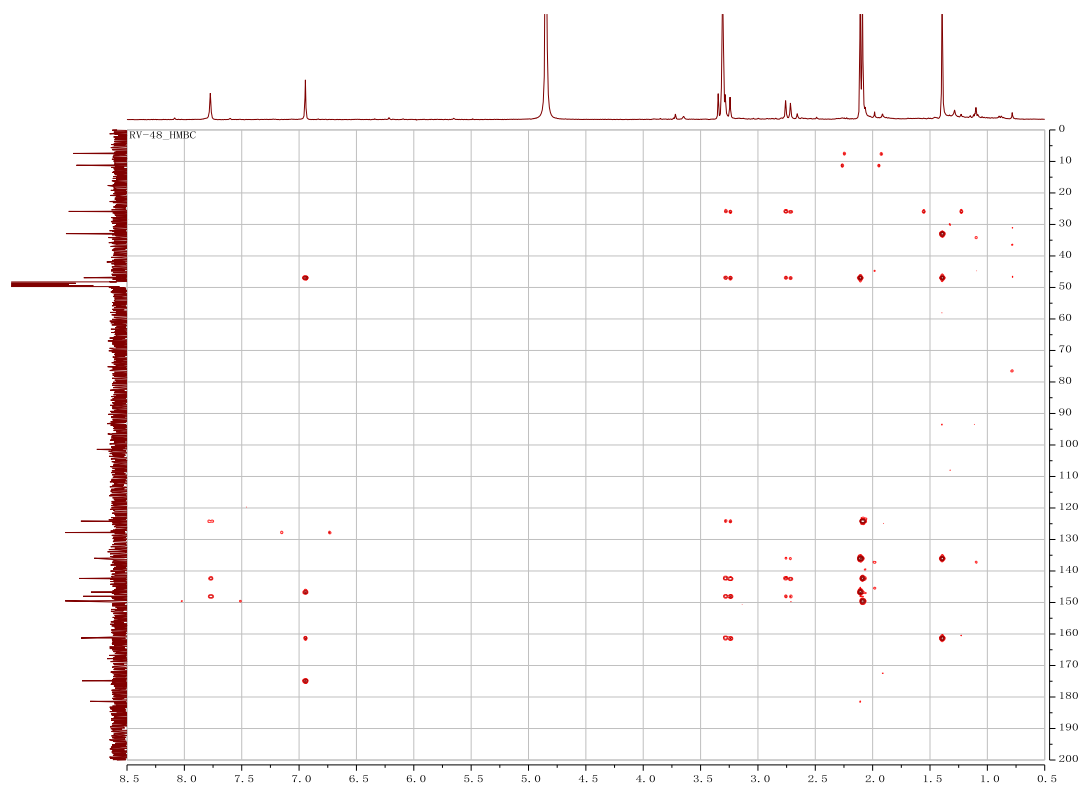

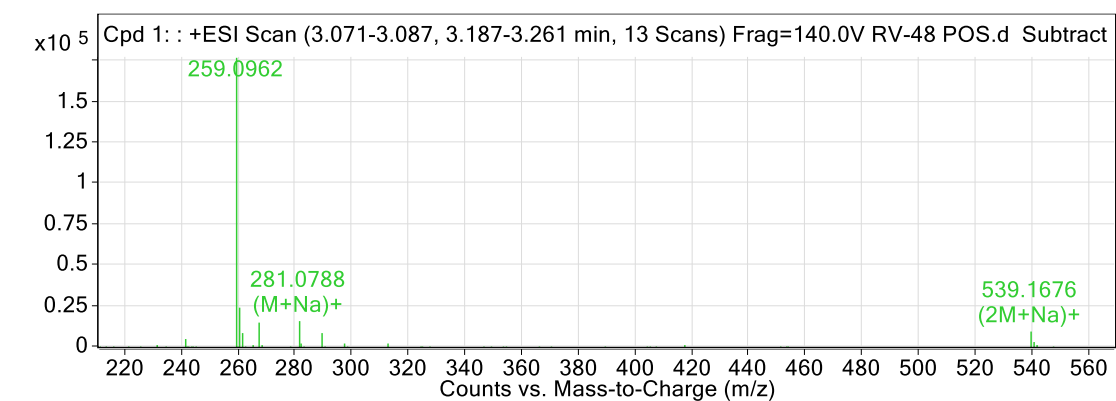

| <i>m/z</i> | <i>Calc m/z</i> | Diff(ppm) | <i>z</i> | Abund    | Formula                                          | Ion                  |
|------------|-----------------|-----------|----------|----------|--------------------------------------------------|----------------------|
| 259.0962   | 259.0965        | -1.21     | 1        | 176911.6 | C <sub>15</sub> H <sub>15</sub> O <sub>4</sub>   | (M+H) <sup>+</sup>   |
| 281.0788   | 281.0784        | 1.41      | 1        | 16374.6  | C <sub>15</sub> H <sub>14</sub> NaO <sub>4</sub> | (M+Na) <sup>+</sup>  |
| 539.1676   | 539.1676        | -0.13     | 1        | 10018.4  | C <sub>30</sub> H <sub>28</sub> NaO <sub>8</sub> | (2M+Na) <sup>+</sup> |

### HRESIMS spectrum of **12**

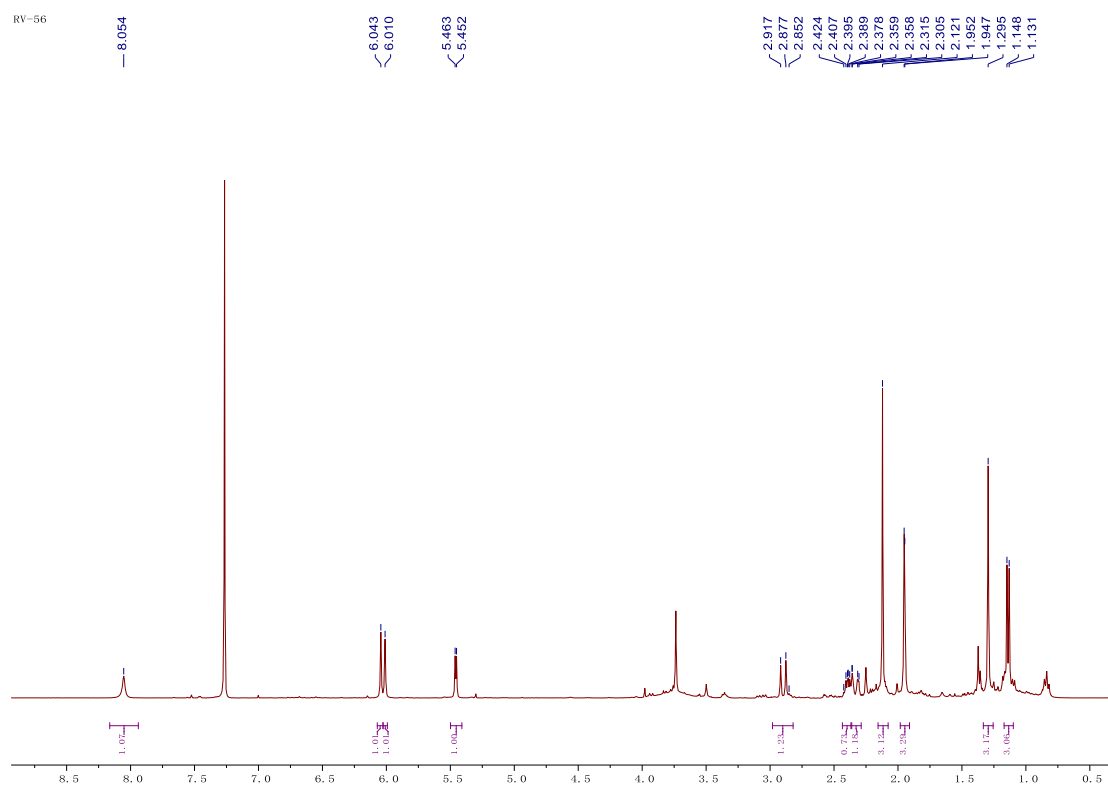

<sup>1</sup>H NMR spectrum of **13** (CDCl<sub>3</sub>, 400 MHz)



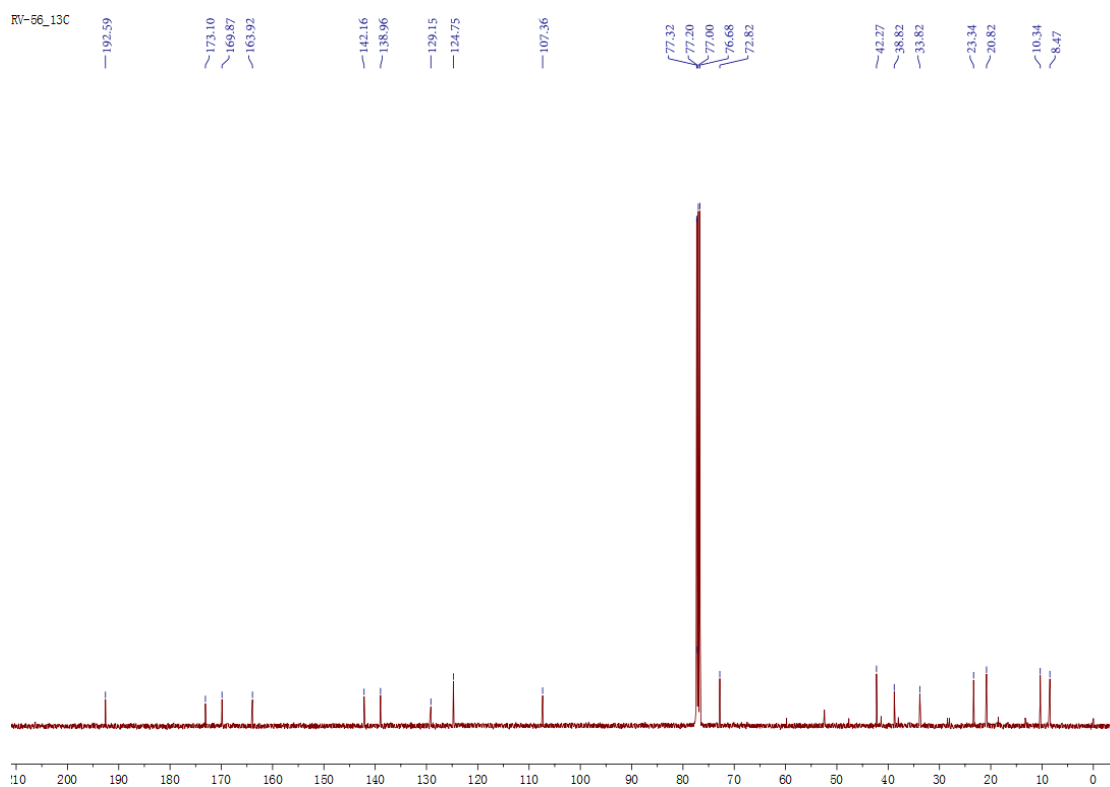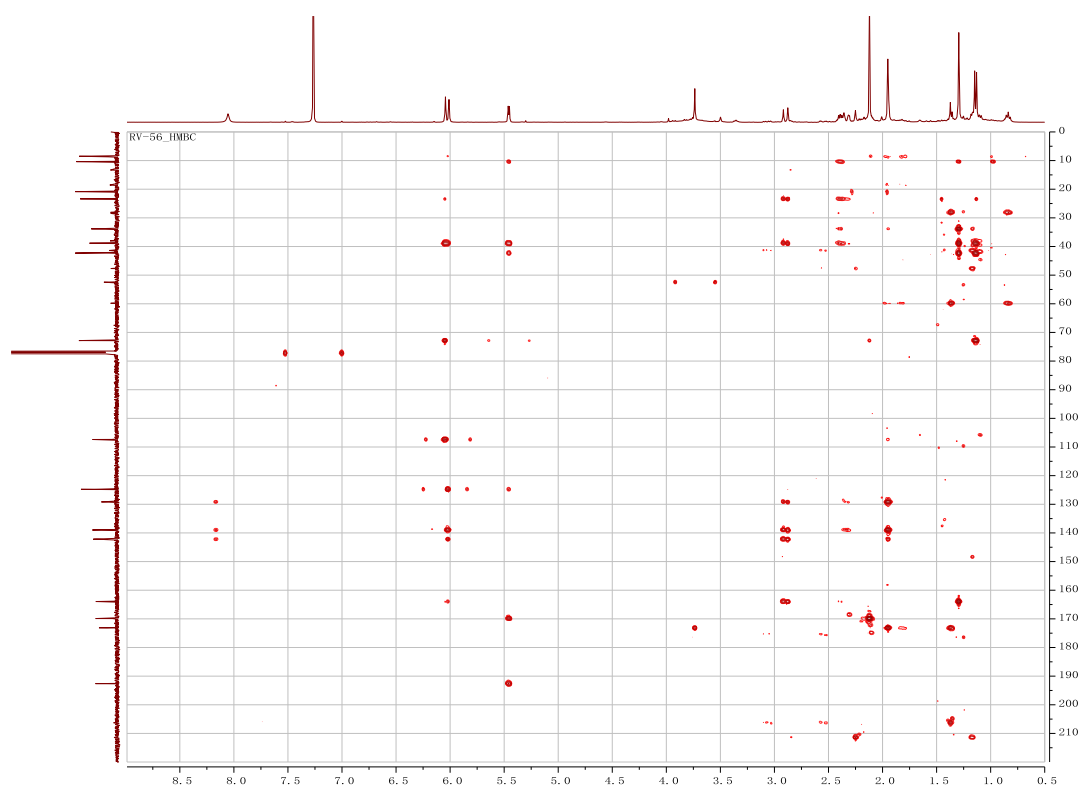

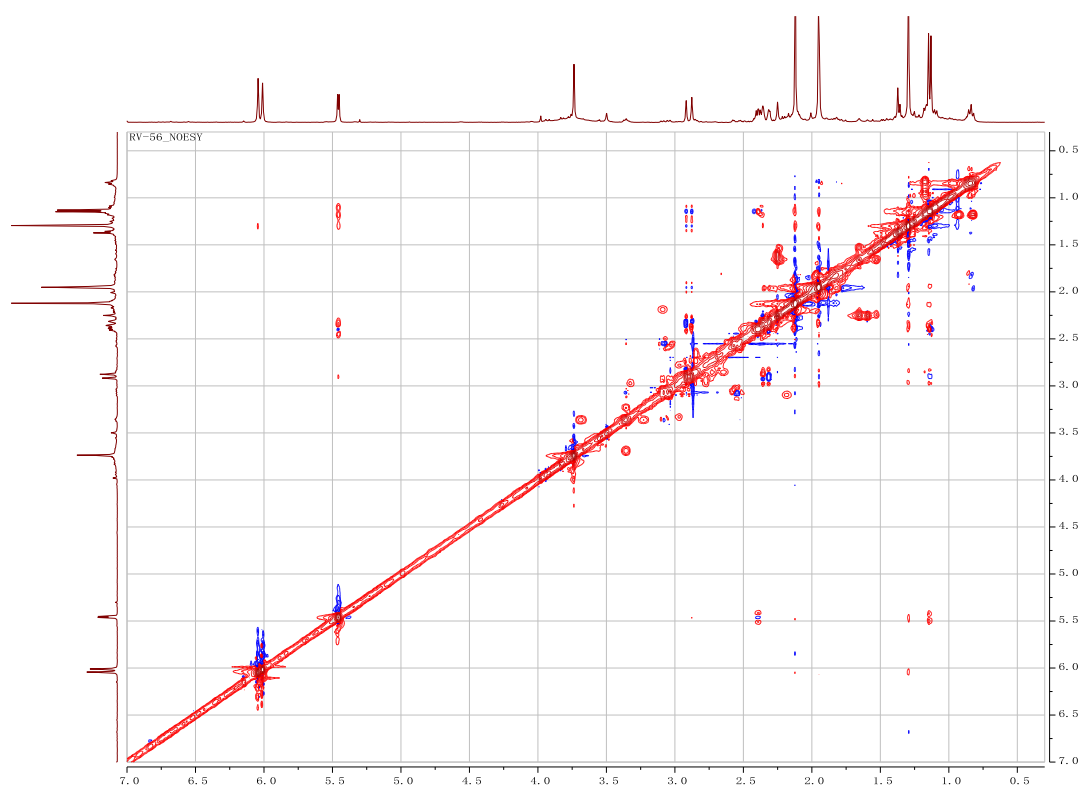

NOESY spectrum of **13**

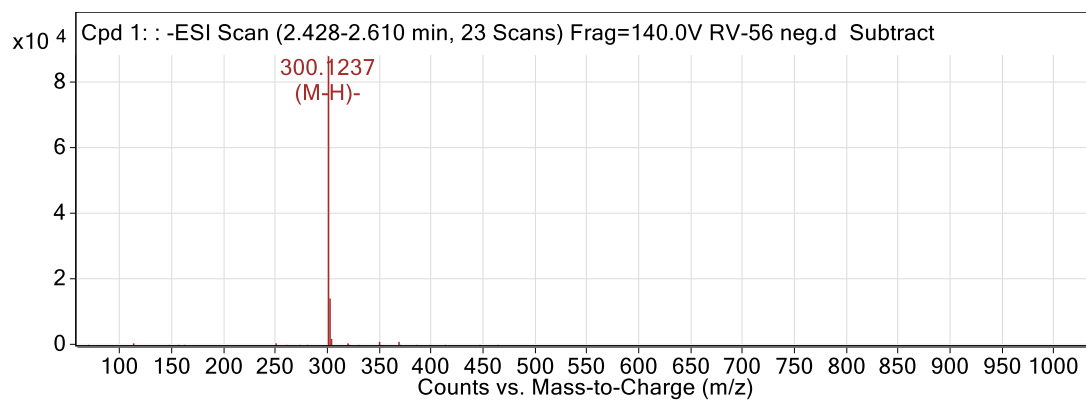

| <i>m/z</i> | <i>Calc m/z</i> | Diff(ppm) | <i>z</i> | Abund | Formula                                         | Ion                |
|------------|-----------------|-----------|----------|-------|-------------------------------------------------|--------------------|
| 300.1237   | 300.1241        | -1.34     | -1       | 88045 | C <sub>17</sub> H <sub>18</sub> NO <sub>4</sub> | (M-H) <sup>-</sup> |

HRESIMS spectrum of **13**

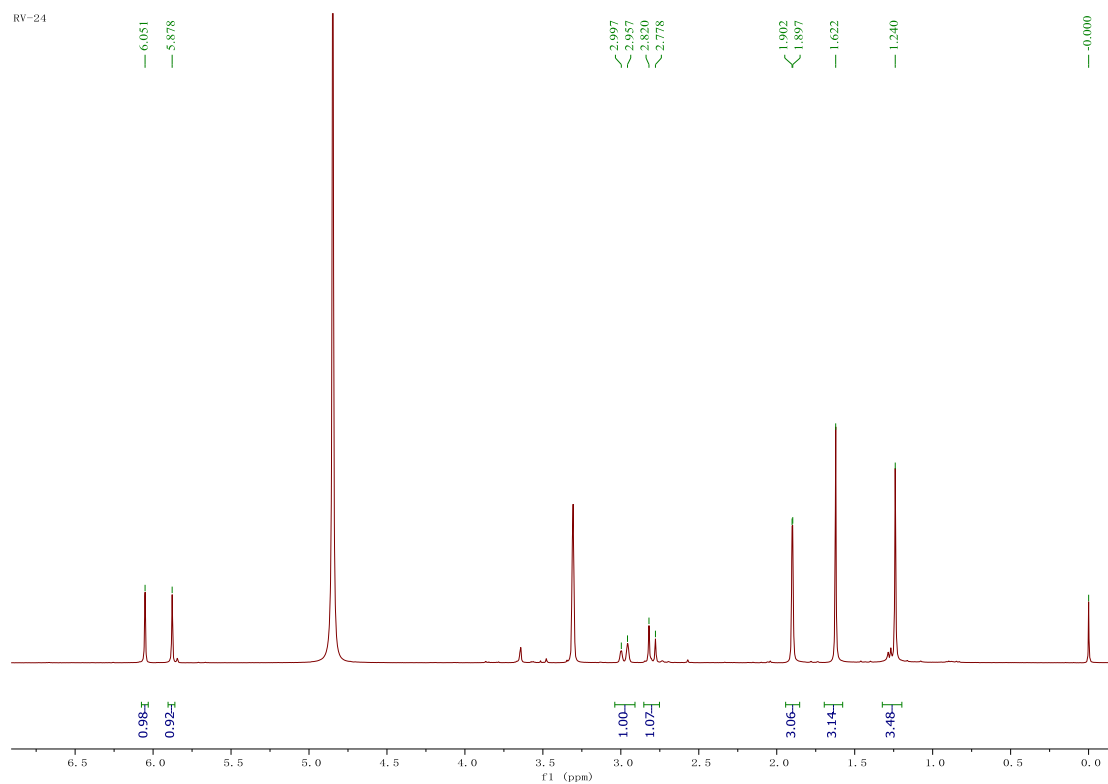

$^1\text{H}$  NMR spectrum of **14** ( $\text{CD}_3\text{OD}$ , 400 MHz)

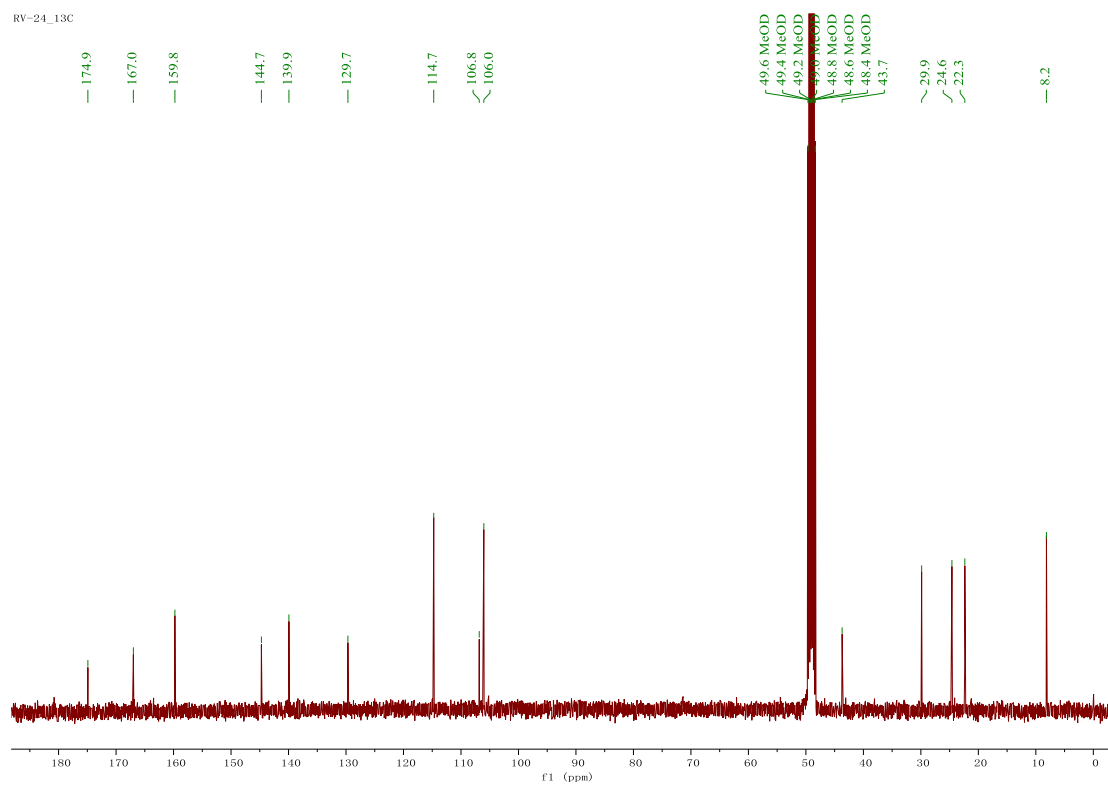

$^{13}\text{C}$  NMR spectrum of **14** ( $\text{CD}_3\text{OD}$ , 100 MHz)

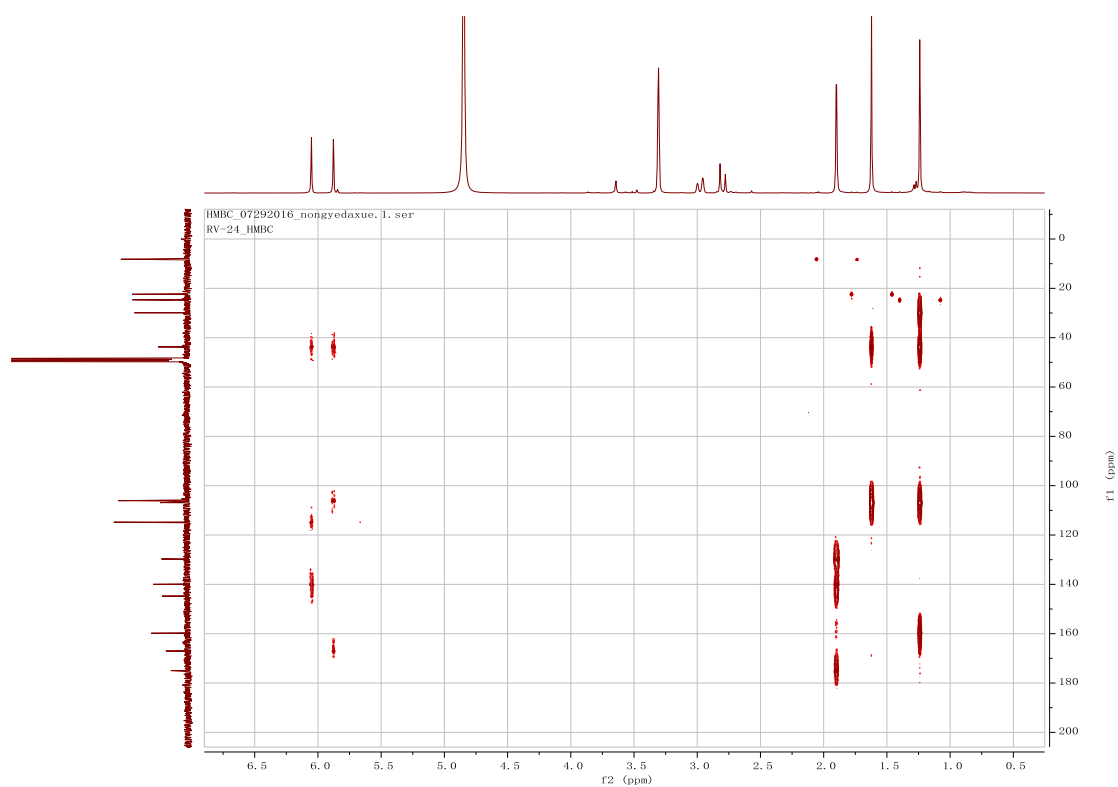

HMBC spectrum of **14** ( $\text{CD}_3\text{OD}$ )

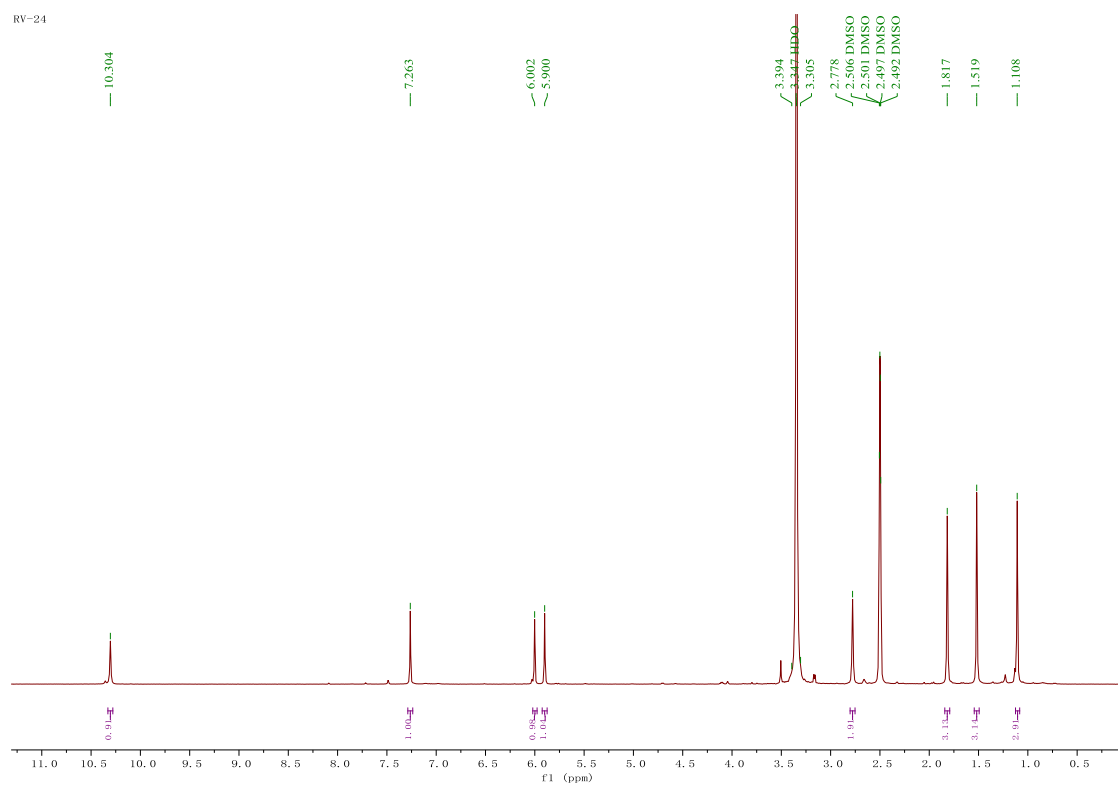

$^1\text{H}$  NMR spectrum of **14** ( $\text{DMSO}-d_6$ , 400 MHz)

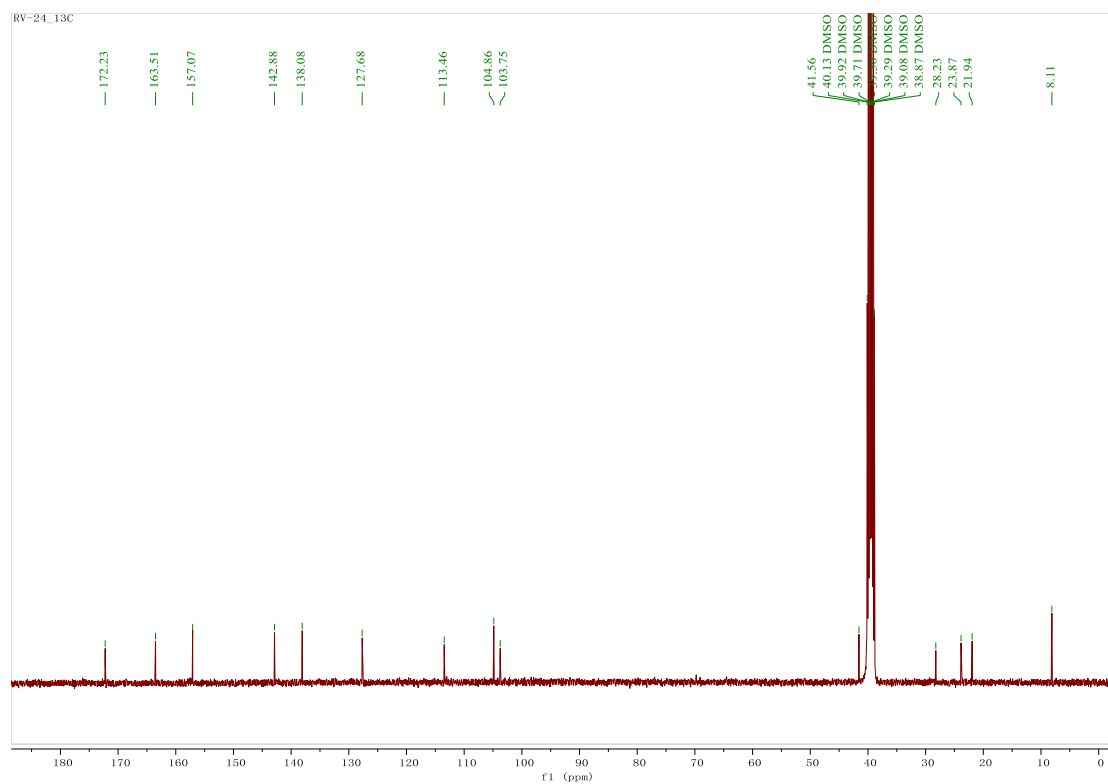

$^{13}\text{C}$  NMR spectrum of **14** ( $\text{DMSO}-d_6$ , 100 MHz)

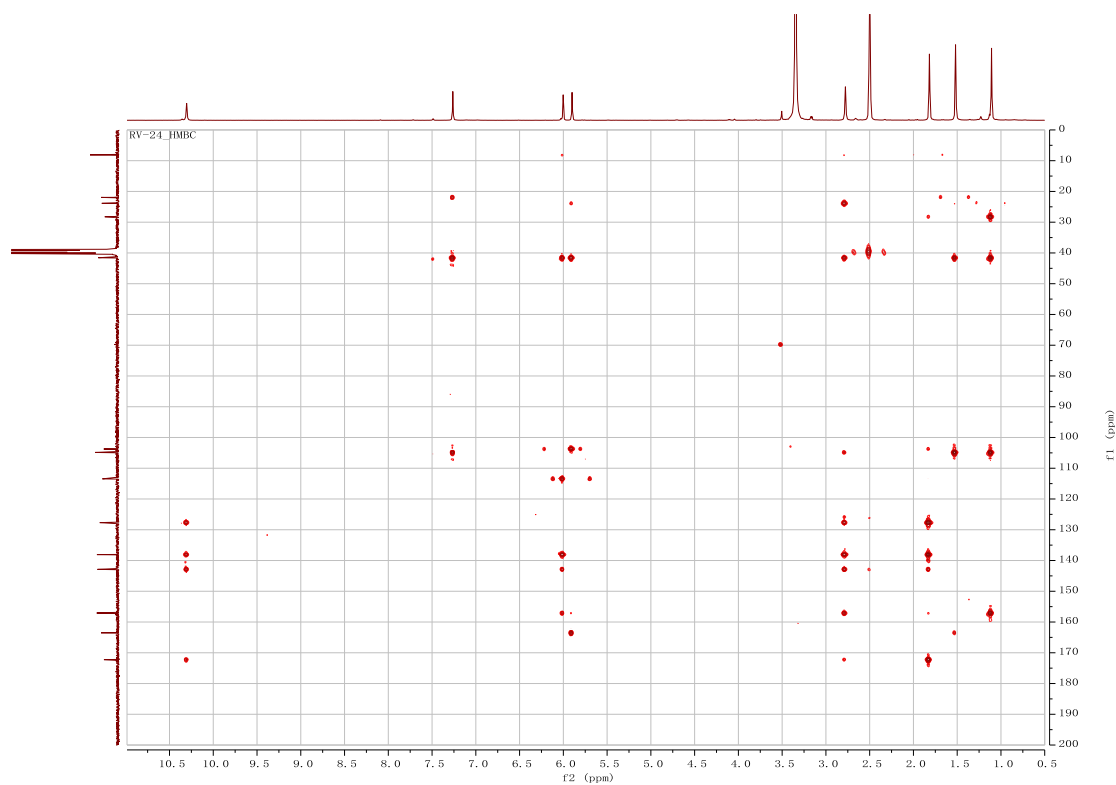

HMBC spectrum of **14** ( $\text{DMSO}-d_6$ )

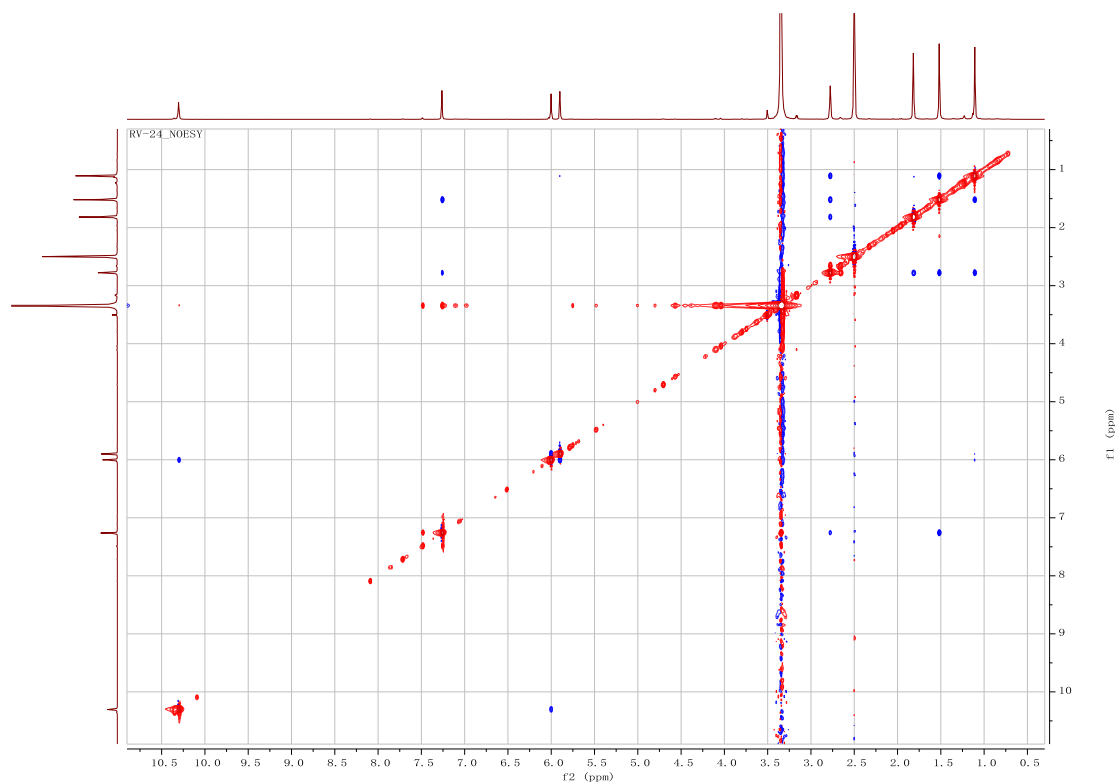

NOESY spectrum of **14** (DMSO-*d*<sub>6</sub>)

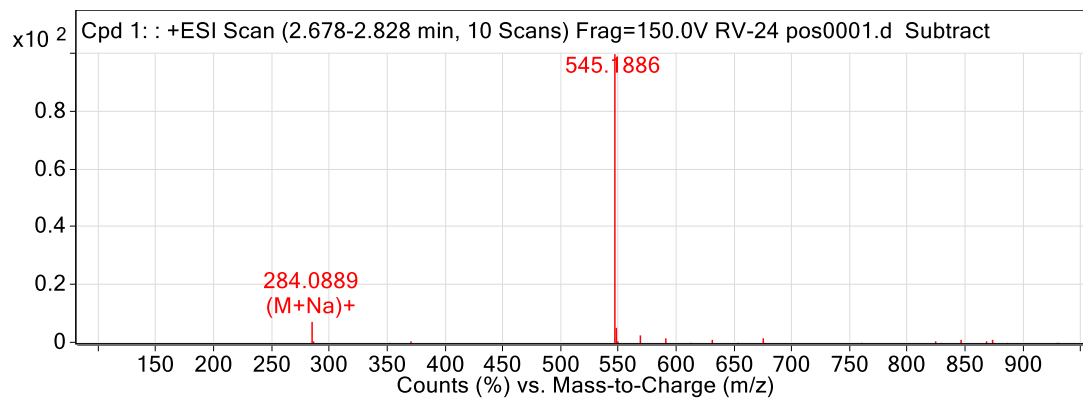

| <i>m/z</i> | <i>Calc m/z</i> | Diff(ppm) | <i>z</i> | Abund  | Formula                                                         | Ion                  |
|------------|-----------------|-----------|----------|--------|-----------------------------------------------------------------|----------------------|
| 284.0889   | 284.0893        | -1.55     | 1        | 2326.7 | C <sub>14</sub> H <sub>15</sub> NNaO <sub>4</sub>               | (M+Na) <sup>+</sup>  |
| 545.1886   | 545.1894        | -1.51     | 1        | 30926  | C <sub>28</sub> H <sub>30</sub> N <sub>2</sub> NaO <sub>8</sub> | (2M+Na) <sup>+</sup> |

HRESIMS spectrum of **14**
